# Supplementary material for: Molecular and Cellular Response to Experimental Anisakis pegreffii (Nematoda, Anisakidae) Third-Stage Larval Infection in Rats
Source: Front Immunol. 2018 Sep 7;9:2055. doi: 10.3389/fimmu.2018.02055 (PMC6137129; doi:10.3389/fimmu.2018.02055)
Supplement: Supplementary file 2 [file Table_2.XLSX]

## Sheet: Stomach
Anisakis-infected stomach tissues of Sprague-Dawley rats
Entrez Gene ID	Gene description	Gene symbol	logFC	logCPM	p value	FDR	TREAT
24620	regenerating family member 3 gamma	Reg3g	6.25346	6.25195	7.39171e-239	9.0992e-235	True
24770	C-C motif chemokine ligand 2	Ccl2	3.34701	3.60747	1.44966e-53	8.92263e-50	True
171162	regenerating islet-derived 3 alpha	Reg3a	6.44902	2.63139	3.49378e-53	1.43362e-49	True
116547	S100 calcium binding protein A8	S100a8	4.67814	2.14036	3.53903e-45	1.08914e-41	True
293618	interferon induced transmembrane protein 1	Ifitm1	1.15088	5.00657	1.4237e-31	3.50515e-28	False
94195	S100 calcium binding protein A9	S100a9	3.53225	2.62153	2.66976e-31	5.47746e-28	True
171052	matrix metallopeptidase 13	Mmp13	3.87423	2.03101	7.7673e-31	1.36594e-27	True
81503	C-X-C motif chemokine ligand 1	Cxcl1	3.46266	2.08443	4.24668e-30	6.53458e-27	True
287561	C-C motif chemokine ligand 7	Ccl7	2.566	3.18602	6.63132e-30	9.07017e-27	True
25258	glycosylation dependent cell adhesion molecule 1	Glycam1	2.28331	2.88033	3.56114e-28	4.38376e-25	True
89824	chitinase 3 like 1	Chi3l1	2.31022	2.92973	1.38268e-27	1.54735e-24	True
24618	regenerating family member 3 beta	Reg3b	5.42954	7.15833	3.44164e-27	3.53055e-24	True
60665	C-X-C motif chemokine ligand 6	Cxcl6	3.80232	1.23343	1.83874e-25	1.74114e-22	True
29692	phospholipase A2 group IIA	Pla2g2a	1.31466	5.07713	2.00206e-24	1.76038e-21	False
24714	regenerating family member 1 alpha	Reg1a	3.04061	6.2687	4.00996e-24	3.29084e-21	True
171045	matrix metallopeptidase 3	Mmp3	4.43098	2.23246	1.03901e-23	7.99386e-21	True
116510	TIMP metallopeptidase inhibitor 1	Timp1	1.91478	6.60528	1.03773e-22	7.51438e-20	True
25748	5'-aminolevulinate synthase 2	Alas2	3.55986	2.69906	6.06911e-21	4.1506e-18	True
54320	podoplanin	Pdpn	1.01486	4.64124	2.10925e-20	1.36657e-17	False
170496	lipocalin 2	Lcn2	1.94318	2.95522	8.54099e-20	5.25698e-17	True
499879	dual oxidase maturation factor 2	Duoxa2	2.00957	2.81151	1.85099e-19	1.08503e-16	True
361673	interferon induced transmembrane protein 3	Ifitm3	0.825448	6.50704	1.05738e-18	5.91651e-16	False
362248	protein C receptor	Procr	1.22229	3.83897	2.07879e-18	1.11261e-15	False
25333	matrix Gla protein	Mgp	1.12051	8.10588	4.01027e-17	2.05694e-14	False
25285	insulin-like growth factor binding protein 5	Igfbp5	1.0385	7.40406	8.21029e-17	4.04275e-14	False
24451	heme oxygenase 1	Hmox1	2.09905	5.76776	2.2742e-15	1.07675e-12	True
689388	pentraxin 3	Ptx3	3.64543	3.04428	2.75266e-15	1.25501e-12	True
171551	chemokine (C-X-C motif) ligand 3	Cxcl3	3.73752	1.16606	5.10209e-15	2.2431e-12	True
84050	ectonucleotide pyrophosphatase/phosphodiesterase 2	Enpp2	-0.933723	4.36528	5.56997e-15	2.36436e-12	False
685448	Purkinje cell protein 4-like 1	Pcp4l1	-0.882194	7.37563	8.88878e-15	3.64736e-12	False
25293	aquaporin 4	Aqp4	-0.774392	6.79666	3.9716e-14	1.57711e-11	False
360504	hemoglobin, alpha 2	Hba2	3.29144	6.86781	5.49204e-14	2.11272e-11	True
24440	hemoglobin subunit beta	Hbb	3.36945	6.83092	6.56195e-14	2.44781e-11	True
81639	arachidonate 15-lipoxygenase	Alox15	2.05971	2.2649	8.28977e-14	3.00138e-11	True
680875	similar to dystonin isoform 1	LOC680875	-0.726118	5.43692	9.13215e-14	3.21191e-11	False
50692	plasminogen activator, urokinase receptor	Plaur	1.39334	3.30273	1.37991e-13	4.71852e-11	False
445415	S100 calcium binding protein A11	S100a11	0.969295	7.36849	1.43217e-13	4.76486e-11	False
24330	early growth response 1	Egr1	0.92007	5.46627	2.19083e-13	7.09715e-11	False
303671	fatty acid desaturase 6	Fads6	-0.961464	4.5199	2.36087e-13	7.45186e-11	False
114105	C-X-C motif chemokine ligand 2	Cxcl2	3.92135	0.497626	2.78263e-13	8.56353e-11	True
312574	leucine-rich repeats and immunoglobulin-like domains 1	Lrig1	-0.698889	6.62968	3.36823e-13	1.01129e-10	False
116640	tenascin C	Tnc	0.881954	5.84158	3.73013e-13	1.09328e-10	False
245982	coronin 6	Coro6	-0.770915	4.82183	4.18659e-13	1.19853e-10	False
25294	alpha-2-glycoprotein 1, zinc-binding	Azgp1	-0.698809	4.92006	4.63876e-13	1.2978e-10	False
305835	pellino E3 ubiquitin protein ligase family member 2	Peli2	-0.786466	4.76116	5.48214e-13	1.49967e-10	False
25433	heparin-binding EGF-like growth factor	Hbegf	1.05737	3.45713	1.11966e-12	2.99631e-10	False
25632	hemoglobin, alpha 1	Hba1	3.38088	8.06483	1.58087e-12	4.14052e-10	True
497942	C-X-C motif chemokine ligand 16	Cxcl16	0.664917	5.57189	3.59323e-12	9.21513e-10	False
25445	FOS like 1, AP-1 transcription factor subunit	Fosl1	3.4713	0.645844	8.46399e-12	2.12636e-09	True
503214	RNA binding protein with multiple splicing 2	Rbpms2	-0.637037	5.20788	9.93353e-12	2.44564e-09	False
29197	interleukin 18	Il18	0.673767	4.85599	1.05915e-11	2.55651e-09	False
289264	gremlin 2, DAN family BMP antagonist	Grem2	-0.632299	6.334	1.34458e-11	3.18304e-09	False
297738	STEAP family member 1	Steap1	2.82025	0.126601	1.6785e-11	3.89856e-09	True
362377	HECT and RLD domain containing E3 ubiquitin protein ligase 3	Herc3	-0.636841	5.6034	1.71899e-11	3.91865e-09	False
310914	bone morphogenetic protein receptor type 1B	Bmpr1b	-0.868984	3.9798	2.26267e-11	5.06427e-09	False
25375	aldehyde dehydrogenase 3 family, member A1	Aldh3a1	0.687154	6.99861	3.12929e-11	6.87884e-09	False
102556347	carbonyl reductase [NADPH] 1-like	LOC102556347	0.609451	6.47133	3.66952e-11	7.92488e-09	False
59329	salt-inducible kinase 1	Sik1	-0.654901	6.18748	4.94174e-11	1.04884e-08	False
497974	myosin XIX	Myo19	-0.592605	5.26035	7.88815e-11	1.64582e-08	False
29183	amphiregulin	Areg	0.717578	4.611	8.06066e-11	1.65378e-08	False
64534	Pim-3 proto-oncogene, serine/threonine kinase	Pim3	-0.754305	6.58166	1.05425e-10	2.12751e-08	False
366360	myogenesis regulating glycosidase	Myorg	-0.678663	4.40304	1.07734e-10	2.13905e-08	False
307582	laminin subunit alpha 3	Lama3	0.759045	5.22813	1.26762e-10	2.4769e-08	False
499702	synaptopodin 2	Synpo2	-0.586031	5.8762	1.32128e-10	2.54141e-08	False
89829	suppressor of cytokine signaling 3	Socs3	1.80567	2.15132	1.41138e-10	2.67294e-08	False
29527	prostaglandin-endoperoxide synthase 2	Ptgs2	0.924725	3.98631	1.64731e-10	3.07249e-08	False
29397	C-C motif chemokine ligand 11	Ccl11	0.704913	6.79003	2.08009e-10	3.82178e-08	False
303439	monocyte to macrophage differentiation-associated	Mmd	0.975099	4.00968	2.55025e-10	4.59126e-08	False
303250	Y box binding protein 2	Ybx2	-0.702492	4.7603	2.57349e-10	4.59126e-08	False
689415	metallothionein 2A	Mt2A	2.15389	5.6406	2.79557e-10	4.91621e-08	True
304078	carbonyl reductase 3	Cbr3	0.537681	5.83549	3.27332e-10	5.6753e-08	False
361833	ankyrin 3	Ank3	-0.643264	7.02032	3.63548e-10	6.21567e-08	False
363455	chordin-like 1	Chrdl1	-1.10111	3.74278	3.88589e-10	6.55278e-08	False
308028	solute carrier family 2 member 12	Slc2a12	-0.623379	4.68521	4.20988e-10	7.00319e-08	False
25558	syntaxin binding protein 1	Stxbp1	-0.609562	4.94844	4.58299e-10	7.52222e-08	False
171040	interleukin 11	Il11	2.15481	1.39758	4.80101e-10	7.77637e-08	True
24517	JunB proto-oncogene, AP-1 transcription factor subunit	Junb	0.715843	5.65967	5.04714e-10	8.06887e-08	False
288596	tripartite motif-containing 50	Trim50	-0.704749	7.30325	5.84894e-10	9.23082e-08	False
24216	ATPase H+/K+ transporting alpha subunit	Atp4a	-0.712356	12.9487	7.16261e-10	1.1161e-07	False
25464	intercellular adhesion molecule 1	Icam1	1.15002	3.16414	8.58064e-10	1.32035e-07	False
25389	activating transcription factor 3	Atf3	0.952762	4.55031	9.57565e-10	1.45526e-07	False
56782	serglycin	Srgn	1.07111	3.42661	9.91318e-10	1.48819e-07	False
315135	Sad1 and UNC84 domain containing 2	Sun2	-0.54863	5.14969	1.16744e-09	1.73147e-07	False
290529	transmembrane protein 254	Tmem254	0.545319	5.7245	1.22711e-09	1.7983e-07	False
25619	plasminogen activator, urokinase	Plau	0.589982	6.68049	1.30735e-09	1.89335e-07	False
302965	TNF receptor superfamily member 12A	Tnfrsf12a	1.55623	2.59261	1.55661e-09	2.22812e-07	False
25139	solute carrier family 2 member 4	Slc2a4	-0.788812	6.5233	1.62148e-09	2.27806e-07	False
24258	chromogranin A	Chga	-0.668565	8.5925	1.62851e-09	2.27806e-07	False
59325	epiregulin	Ereg	2.13347	2.02919	1.82149e-09	2.51939e-07	True
286916	testin gene	Testin	1.06185	2.92245	1.8778e-09	2.54068e-07	False
498630	WW and C2 domain containing 2	Wwc2	-0.642348	5.24169	1.87816e-09	2.54068e-07	False
299210	estrogen-related receptor beta	Esrrb	-0.928023	3.71419	2.10619e-09	2.81817e-07	False
362720	ribonucleotide reductase regulatory subunit M2	Rrm2	1.26993	3.04654	2.33045e-09	3.08471e-07	False
316212	prickle planar cell polarity protein 4	Prickle4	-0.681716	4.65064	2.44472e-09	3.20154e-07	False
498690	cytotoxic T lymphocyte-associated protein 2 alpha	Ctla2a	0.660252	7.05445	2.72225e-09	3.52746e-07	False
116719	acetyl-CoA carboxylase beta	Acacb	-0.542593	5.65432	2.80724e-09	3.5997e-07	False
25618	acyl-CoA dehydrogenase, short/branched chain	Acadsb	-0.582316	4.86476	2.86128e-09	3.63118e-07	False
79126	complement factor I	Cfi	2.10567	1.25949	3.0038e-09	3.77315e-07	True
25625	TNF receptor superfamily member 1A	Tnfrsf1a	0.59518	6.23122	3.31565e-09	4.1228e-07	False
56611	annexin A2	Anxa2	0.990666	7.7207	3.82163e-09	4.70443e-07	False
680409	proline dehydrogenase 1	Prodh1	-0.594972	5.64387	4.11979e-09	5.02125e-07	False
302642	spermidine/spermine N1-acetyl transferase 1	Sat1	0.598313	7.89317	4.50862e-09	5.44129e-07	False
84020	potassium voltage-gated channel subfamily Q member 1	Kcnq1	-0.738377	6.97063	5.23707e-09	6.25906e-07	False
100134871	beta globin minor gene	LOC100134871	3.22888	6.31933	5.34744e-09	6.32952e-07	True
79107	dual oxidase 2	Duox2	1.72014	5.12592	5.71058e-09	6.68027e-07	False
25673	annexin A5	Anxa5	0.595465	6.90319	5.75231e-09	6.68027e-07	False
287422	period circadian regulator 1	Per1	-0.634878	5.65493	6.42682e-09	7.32686e-07	False
302971	protease, serine, 22	Prss22	2.4386	2.43118	6.42812e-09	7.32686e-07	True
300158	kinesin family member 21A	Kif21a	-0.618371	5.43208	6.70646e-09	7.57399e-07	False
680451	nuclear receptor binding protein 2	Nrbp2	-0.600132	5.61374	7.10426e-09	7.95032e-07	False
140910	methylsterol monooxygenase 1	Msmo1	0.580433	6.57153	8.42998e-09	9.34893e-07	False
316273	minichromosome maintenance complex component 3	Mcm3	0.917598	3.39029	8.6498e-09	9.50706e-07	False
84397	TNF alpha induced protein 6	Tnfaip6	2.24158	2.67539	9.31201e-09	1.01443e-06	True
311137	zinc finger protein 385B	Zfp385b	-0.748339	3.84327	1.16779e-08	1.26101e-06	False
117560	Kruppel-like factor 9	Klf9	-0.533103	5.02334	1.20633e-08	1.2913e-06	False
50622	solute carrier family 23 member 2	Slc23a2	-0.581865	5.7163	1.22637e-08	1.30144e-06	False
500929	tubulin, alpha 1B	Tuba1b	0.59862	6.90906	1.30688e-08	1.37501e-06	False
308854	chordin-like 2	Chrdl2	2.13193	1.4935	1.39578e-08	1.45611e-06	False
308797	cell migration-inducing hyaluronan binding protein	Cemip	0.924565	4.52056	1.48904e-08	1.54034e-06	False
25542	C-C motif chemokine ligand 3	Ccl3	2.27869	-0.0829282	1.52041e-08	1.55969e-06	True
114709	interferon induced transmembrane protein 2	Ifitm2	0.49138	6.04624	1.55717e-08	1.58419e-06	False
54227	actin related protein 2/3 complex, subunit 1B	Arpc1b	0.595449	6.62004	1.74221e-08	1.75792e-06	False
89784	isopentenyl-diphosphate delta isomerase 1	Idi1	0.571723	6.46492	1.82738e-08	1.82319e-06	False
84551	solute carrier family 7 member 8	Slc7a8	-0.604539	7.62911	1.83652e-08	1.82319e-06	False
100359539	ribonucleotide reductase M2 polypeptide	LOC100359539	1.30406	2.01201	2.57465e-08	2.53551e-06	False
362605	transmembrane protein 54	Tmem54	0.479841	5.64581	2.75659e-08	2.67087e-06	False
361923	ribosomal protein L22 like 1	Rpl22l1	0.583532	5.54313	2.77573e-08	2.67087e-06	False
113976	acyl-CoA synthetase long-chain family member 4	Acsl4	0.565862	4.96876	2.79649e-08	2.67087e-06	False
361597	FES proto-oncogene, tyrosine kinase	Fes	-0.694167	4.40297	2.79888e-08	2.67087e-06	False
362432	C-type lectin domain family 4, member D	Clec4d	2.27296	0.8317	2.89169e-08	2.73821e-06	True
300795	PCNA clamp associated factor	Pclaf	1.31314	1.97872	3.32001e-08	3.1198e-06	False
246240	receptor-interacting serine-threonine kinase 3	Ripk3	0.91254	3.84247	3.69702e-08	3.44775e-06	False
84509	RAN, member RAS oncogene family	Ran	0.529962	6.69506	3.72794e-08	3.45045e-06	False
295342	ras homolog family member C	Rhoc	0.650822	4.88882	3.9614e-08	3.63917e-06	False
54237	cyclin-dependent kinase 1	Cdk1	0.991753	3.27438	4.25327e-08	3.87835e-06	False
29230	squalene epoxidase	Sqle	0.487547	5.78608	4.39301e-08	3.97632e-06	False
691335	septin 6	2006-09-01	-0.577522	4.69085	4.50347e-08	4.04655e-06	False
171396	sulfatase 1	Sulf1	0.672677	4.22145	4.65694e-08	4.15412e-06	False
24795	serine (or cysteine) peptidase inhibitor, clade A, member 3N	Serpina3n	2.47581	4.48625	4.7368e-08	4.19497e-06	True
303330	transmembrane protein 97	Tmem97	0.578156	4.65904	4.85592e-08	4.2576e-06	False
81653	drebrin 1	Dbn1	-0.483765	5.50532	4.8767e-08	4.2576e-06	False
84604	hepcidin antimicrobial peptide	Hamp	1.11589	5.6821	4.98368e-08	4.32036e-06	False
288669	actin related protein 2/3 complex, subunit 3	Arpc3	0.498368	6.66643	5.14168e-08	4.42616e-06	False
303794	DiGeorge syndrome critical region gene 6	Dgcr6	-0.664871	6.16252	5.18625e-08	4.43353e-06	False
311730	G protein-coupled receptor 155	Gpr155	-0.973747	7.95347	5.35872e-08	4.54937e-06	False
24494	interleukin 1 beta	Il1b	1.72078	2.0982	5.59101e-08	4.71407e-06	False
681185	centromere protein H	Cenph	1.63053	0.932362	6.00653e-08	5.02996e-06	False
287167	hemoglobin alpha, adult chain 1	Hba-a1	3.33838	3.14606	6.24334e-08	5.19294e-06	True
288016	prolyl 3-hydroxylase 2	P3h2	-0.590305	4.96776	7.23727e-08	5.96114e-06	False
502317	amyloid beta precursor like protein 1	Aplp1	-0.527846	6.45975	7.26377e-08	5.96114e-06	False
25147	cytochrome P450, family 19, subfamily a, polypeptide 1	Cyp19a1	-0.925136	7.88926	7.51925e-08	6.11137e-06	False
24443	histidine decarboxylase	Hdc	-0.881296	7.0054	7.54613e-08	6.11137e-06	False
102551356	uncharacterized LOC102551356	LOC102551356	0.547724	4.62538	7.81612e-08	6.26437e-06	False
301509	tensin 1	Tns1	-0.530273	6.09044	7.83683e-08	6.26437e-06	False
64392	aldehyde dehydrogenase 1 family, member L1	Aldh1l1	-0.629383	5.46504	8.23199e-08	6.5378e-06	False
85247	S100 calcium binding protein A6	S100a6	0.656972	9.29819	8.7219e-08	6.88247e-06	False
291885	minichromosome maintenance complex component 5	Mcm5	0.885624	3.29824	1.05398e-07	8.264e-06	False
60338	FXYD domain-containing ion transport regulator 5	Fxyd5	0.966216	4.03597	1.08534e-07	8.45603e-06	False
360718	popeye domain containing 2	Popdc2	-0.830578	3.63091	1.19166e-07	9.226e-06	False
681913	glutathione S-transferase zeta 1	Gstz1	-0.544515	5.76416	1.27881e-07	9.6708e-06	False
24367	fibrinogen gamma chain	Fgg	1.94375	0.706989	1.287e-07	9.6708e-06	False
116484	thioredoxin 1	Txn1	0.528447	8.00423	1.28736e-07	9.6708e-06	False
79119	ADP-ribosylation factor 2	Arf2	0.534845	4.765	1.28752e-07	9.6708e-06	False
691810	phospholipase A2 group IVC	Pla2g4c	4.40191	2.72071	1.28839e-07	9.6708e-06	True
312192	adenosylhomocysteinase-like 2	Ahcyl2	-0.588632	8.27211	1.35148e-07	1.00332e-05	False
286926	tissue factor pathway inhibitor 2	Tfpi2	2.39009	0.560237	1.35393e-07	1.00332e-05	False
308346	transmembrane protein 150B	Tmem150b	1.01811	3.00104	1.36113e-07	1.00332e-05	False
366492	Eph receptor A2	Epha2	0.616448	4.6887	1.38798e-07	1.01703e-05	False
29685	minichromosome maintenance complex component 6	Mcm6	0.796178	4.01672	1.40504e-07	1.02344e-05	False
24788	sorbitol dehydrogenase	Sord	-0.622552	5.72623	1.42609e-07	1.03266e-05	False
311532	syndecan binding protein 2	Sdcbp2	0.493664	5.3231	1.52495e-07	1.09778e-05	False
115771	ubiquitin specific peptidase 2	Usp2	-0.859366	3.97692	1.54983e-07	1.10921e-05	False
117061	matrix metallopeptidase 10	Mmp10	2.48461	4.2317	1.58432e-07	1.12615e-05	True
170635	dehydrogenase/reductase 9	Dhrs9	0.675322	4.04907	1.5918e-07	1.12615e-05	False
313278	protein tyrosine phosphatase, receptor type, D	Ptprd	-0.62275	4.44531	1.61573e-07	1.13655e-05	False
499991	STEAP4 metalloreductase	Steap4	0.804143	4.56893	1.85103e-07	1.29467e-05	False
310670	ADAMTS-like 4	Adamtsl4	-0.53999	5.38387	2.12031e-07	1.47463e-05	False
100364984	RAB37, member RAS oncogene family	Rab37	-0.536082	4.80474	2.27749e-07	1.57505e-05	False
29286	ribosomal protein S17	Rps17	0.596892	8.38361	2.4918e-07	1.71363e-05	False
287910	chemokine (C-C motif) ligand 6	Ccl6	1.35796	3.39903	2.8955e-07	1.97166e-05	False
360772	zinc finger AN1-type containing 2A	Zfand2a	0.623392	4.49144	2.89903e-07	1.97166e-05	False
360757	mesenteric estrogen-dependent adipogenesis	Medag	1.20627	2.77292	2.96072e-07	2.00255e-05	False
246254	G-protein signaling modulator 1	Gpsm1	-0.687962	4.78419	3.00613e-07	2.02216e-05	False
307428	TNF alpha induced protein 8	Tnfaip8	0.510394	4.52417	3.05488e-07	2.04378e-05	False
360537	target of myb1 like 2 membrane trafficking protein	Tom1l2	-0.5124	4.76429	3.12154e-07	2.07709e-05	False
360857	regulator of G-protein signaling 16	Rgs16	1.6618	0.481784	3.46084e-07	2.29048e-05	False
246306	mammary cancer associated protein RMT-1	Rmt1	-0.67149	10.6691	3.53574e-07	2.32754e-05	False
116694	calpain 9	Capn9	0.494092	6.30926	3.57868e-07	2.33361e-05	False
81814	thymosin beta 4, X-linked	Tmsb4x	0.557202	10.8948	3.58288e-07	2.33361e-05	False
84348	atypical chemokine receptor 3	Ackr3	0.457319	5.73487	3.72936e-07	2.41623e-05	False
84586	fibrinogen-like 2	Fgl2	0.822393	5.47636	3.8688e-07	2.49345e-05	False
117540	phospholipid scramblase 1	Plscr1	0.680862	5.26923	4.17721e-07	2.6782e-05	False
24326	endothelin receptor type A	Ednra	0.531805	4.9468	4.30652e-07	2.7468e-05	False
311803	leucine rich repeat containing 26	Lrrc26	0.48951	4.85983	4.44482e-07	2.8204e-05	False
362962	chromobox 7	Cbx7	-0.448116	5.20928	4.52718e-07	2.85792e-05	False
303692	ST6 N-acetylgalactosaminide alpha-2,6-sialyltransferase 2	St6galnac2	-0.511307	7.16342	4.57084e-07	2.87077e-05	False
310132	oncostatin M receptor	Osmr	1.06428	3.15715	4.61553e-07	2.88166e-05	False
85497	Kruppel-like factor 15	Klf15	-0.51646	5.84377	4.63501e-07	2.88166e-05	False
361991	S100 calcium binding protein A16	S100a16	0.470684	6.8755	4.75385e-07	2.92997e-05	False
680611	B-cell CLL/lymphoma 3	Bcl3	0.652556	4.5504	4.76031e-07	2.92997e-05	False
361954	ventricular zone expressed PH domain-containing 1	Veph1	-0.641876	3.70384	4.84853e-07	2.96943e-05	False
291091	serpin family B member 1A	Serpinb1a	0.564639	7.97898	5.05643e-07	3.07869e-05	False
360243	DNA topoisomerase II alpha	Top2a	0.677569	4.73346	5.10022e-07	3.07869e-05	False
291794	small nuclear ribonucleoprotein D1 polypeptide	Snrpd1	0.595577	4.13385	5.10937e-07	3.07869e-05	False
84402	secreted frizzled-related protein 1	Sfrp1	0.463548	5.78772	5.12699e-07	3.07869e-05	False
684259	RUN and SH3 domain containing 2	Rusc2	-0.556508	4.30346	5.19602e-07	3.105e-05	False
310506	protein phosphatase, Mg2+/Mn2+ dependent, 1L	Ppm1l	-0.429119	5.94841	5.31824e-07	3.16241e-05	False
498228	major facilitator superfamily domain containing 4A	Mfsd4a	-0.537177	7.33104	5.35237e-07	3.16241e-05	False
300992	calcium voltage-gated channel auxiliary subunit alpha2delta 2	Cacna2d2	-0.659683	4.11145	5.3958e-07	3.16241e-05	False
25427	cytochrome P450, family 51	Cyp51	0.495909	7.65542	5.39954e-07	3.16241e-05	False
301113	solute carrier family 25 member 23	Slc25a23	-0.507958	5.09214	5.44473e-07	3.16241e-05	False
25474	galectin 4	Lgals4	0.641296	8.1755	5.44624e-07	3.16241e-05	False
81530	pyruvate dehydrogenase kinase 2	Pdk2	-0.470782	5.59124	5.57888e-07	3.22422e-05	False
686590	IQ motif and Sec7 domain 1	Iqsec1	-0.517876	5.01459	5.64479e-07	3.24707e-05	False
353229	sphingomyelin synthase 1	Sgms1	-0.435382	6.09926	5.95946e-07	3.41214e-05	False
29218	reticulocalbin 2	Rcn2	0.51456	5.26743	6.19477e-07	3.53045e-05	False
84386	secretory leukocyte peptidase inhibitor	Slpi	1.30392	5.20747	6.26736e-07	3.55073e-05	False
25243	aryl hydrocarbon receptor nuclear translocator 2	Arnt2	-0.559014	4.79771	6.28806e-07	3.55073e-05	False
29214	tubulin, beta 5 class I	Tubb5	0.610871	7.63532	6.34849e-07	3.56849e-05	False
679989	t-complex 11 family, X-linked 2	Tcp11x2	-0.748607	3.55482	7.07001e-07	3.95599e-05	False
298518	colony stimulating factor 3 receptor	Csf3r	1.92258	0.676692	7.52459e-07	4.1913e-05	False
25473	laminin subunit beta 2	Lamb2	-0.467872	6.8252	7.69009e-07	4.26419e-05	False
313974	tribbles pseudokinase 2	Trib2	-0.470065	5.42176	8.1872e-07	4.51948e-05	False
313255	whirlin	Whrn	-0.642665	4.1837	8.82003e-07	4.84708e-05	False
316351	neuronal PAS domain protein 2	Npas2	-0.627354	4.77215	8.9275e-07	4.88433e-05	False
312373	5'-nucleotidase, cytosolic IIIA	Nt5c3a	0.413369	5.79215	9.36456e-07	5.10078e-05	False
307398	Rho guanine nucleotide exchange factor 37	Arhgef37	-0.461354	5.54852	9.69346e-07	5.25667e-05	False
309621	RT1 class II, locus Ba	RT1-Ba	0.507858	5.12646	9.74392e-07	5.26086e-05	False
25216	syndecan 1	Sdc1	0.487639	7.11755	1.06557e-06	5.72801e-05	False
64030	KIT proto-oncogene receptor tyrosine kinase	Kit	-0.493511	5.62631	1.09609e-06	5.86648e-05	False
252857	Rap guanine nucleotide exchange factor 4	Rapgef4	-0.729884	3.65358	1.20277e-06	6.40958e-05	False
300438	low density lipoprotein receptor	Ldlr	0.511885	6.19774	1.20942e-06	6.41721e-05	False
307348	spire-type actin nucleation factor 1	Spire1	-0.448315	6.52516	1.39566e-06	7.37362e-05	False
308761	protein regulator of cytokinesis 1	Prc1	0.726372	3.77947	1.44111e-06	7.5812e-05	False
298199	perilipin 2	Plin2	0.634822	4.33656	1.47282e-06	7.71508e-05	False
117022	interleukin 1 receptor type 2	Il1r2	1.31244	1.31037	1.64092e-06	8.55775e-05	False
25380	annexin A1	Anxa1	0.6187	6.73296	1.64759e-06	8.55775e-05	False
24401	glutamic-oxaloacetic transaminase 1	Got1	-0.564829	8.31455	1.68446e-06	8.71246e-05	False
362268	recombination signal binding protein for immunoglobulin kappa J region-like	Rbpjl	-0.672344	3.82002	1.75786e-06	9.0541e-05	False
60586	chloride voltage-gated channel 4	Clcn4	-0.613956	3.71843	1.78111e-06	9.13562e-05	False
373545	protein kinase AMP-activated non-catalytic subunit gamma 2	Prkag2	-0.46553	5.12629	1.90942e-06	9.73929e-05	False
79426	zinc finger protein 36	Zfp36	0.483115	6.17267	1.91463e-06	9.73929e-05	False
65029	amine oxidase, copper containing 1	Aoc1	1.64478	2.82334	1.93324e-06	9.79348e-05	False
307351	tubulin, beta 6 class V	Tubb6	0.716841	4.61829	2.00472e-06	0.00010114	False
298024	A-kinase anchoring protein 2	Akap2	-0.504192	4.8988	2.08564e-06	0.000104793	False
680858	transmembrane protein 40	Tmem40	0.860099	2.87543	2.1018e-06	0.000105175	False
24387	glial fibrillary acidic protein	Gfap	1.49336	1.03969	2.14837e-06	0.000107071	False
363241	eukaryotic translation elongation factor 1 beta 2	Eef1b2	0.480529	7.82186	2.18964e-06	0.000108687	False
114122	versican	Vcan	0.926698	4.21689	2.28302e-06	0.000112867	False
297594	cell division cycle associated 3	Cdca3	0.914766	2.8636	2.39828e-06	0.000118092	False
316313	dystonin	Dst	-0.491134	7.75484	2.41697e-06	0.000118537	False
60663	insulin receptor-related receptor	Insrr	-0.633843	4.03388	2.54432e-06	0.000124288	False
117544	phosphoribosyl pyrophosphate amidotransferase	Ppat	-0.507866	6.98395	2.91455e-06	0.000141438	False
24780	solute carrier family 4 member 2	Slc4a2	-0.607996	8.66156	2.91838e-06	0.000141438	False
360480	cell death-inducing p53 target 1	Cdip1	-0.415208	5.64916	3.00792e-06	0.000145206	False
24678	cAMP-dependent protein kinase inhibitor beta	Pkib	1.53536	1.61604	3.14176e-06	0.000151075	False
294269	RT1 class II, locus Da	RT1-Da	0.43064	5.81104	3.27472e-06	0.000156855	False
296501	histone acetyltransferase 1	Hat1	0.50732	4.64596	3.30886e-06	0.000157876	False
311546	TPX2, microtubule nucleation factor	Tpx2	0.731227	3.37743	3.68014e-06	0.000174913	False
25353	secreted phosphoprotein 1	Spp1	0.553204	5.94542	3.77515e-06	0.000178116	False
498709	CDC28 protein kinase regulatory subunit 2	Cks2	0.848296	2.94866	3.77664e-06	0.000178116	False
310632	RAB25, member RAS oncogene family	Rab25	0.432535	6.63534	3.79094e-06	0.000178116	False
286888	WAP four-disulfide core domain 2	Wfdc2	0.488117	5.65793	4.1295e-06	0.000193286	False
25146	cytochrome P450, family 17, subfamily a, polypeptide 1	Cyp17a1	-0.660724	10.3948	4.39721e-06	0.000205036	False
303298	RAP1 GTPase activating protein 2	Rap1gap2	-0.447918	6.28956	4.4302e-06	0.000205795	False
314322	Fos proto-oncogene, AP-1 transcription factor subunit	Fos	0.710938	4.48227	4.67305e-06	0.000216261	False
259224	neuropeptide W	Npw	0.616119	4.67319	4.70865e-06	0.000217092	False
408233	serine peptidase inhibitor, Kazal type 4	Spink4	1.043	3.51162	4.74627e-06	0.00021801	False
501203	myosin light chain 12A	Myl12a	0.490668	7.22777	4.84652e-06	0.000221787	False
24617	serpin family E member 1	Serpine1	2.27957	3.9829	5.52846e-06	0.000252057	False
114494	cyclin A2	Ccna2	0.836645	3.42083	5.61123e-06	0.000254887	False
29326	glutathione peroxidase 2	Gpx2	2.45361	6.14043	5.7684e-06	0.000260803	False
171048	tetraspanin 8	Tspan8	0.483083	9.85386	5.78386e-06	0.000260803	False
24640	6-phosphofructo-2-kinase/fructose-2,6-biphosphatase 2	Pfkfb2	-0.465435	4.47053	6.15289e-06	0.000276431	False
298385	mago homolog, exon junction complex core component	Magoh	0.531945	4.63003	6.203e-06	0.000277669	False
362988	copine 8	Cpne8	0.573515	4.79648	6.24091e-06	0.000278091	False
308588	carbonic anhydrase 11	Car11	-0.508096	4.1233	6.25762e-06	0.000278091	False
24253	CCAAT/enhancer binding protein beta	Cebpb	0.73215	3.39323	6.48496e-06	0.000287158	False
245983	interleukin 11 receptor subunit alpha 1	Il11ra1	-0.434019	5.94308	6.65323e-06	0.000292795	False
310378	nicotinamide nucleotide transhydrogenase	Nnt	-0.485168	8.56293	6.65984e-06	0.000292795	False
294090	interferon-induced protein with tetratricopeptide repeats 1B-like	Ifit1bl	1.48144	0.502816	6.864e-06	0.000300697	False
25729	cyclin E1	Ccne1	1.47604	0.74482	7.25885e-06	0.000315751	False
308836	potassium channel tetramerization domain containing 14	Kctd14	0.416249	5.40556	7.25894e-06	0.000315751	False
304813	protein phosphatase 1, regulatory subunit 12B	Ppp1r12b	-0.535399	5.96834	7.34427e-06	0.000318338	False
29728	minichromosome maintenance complex component 4	Mcm4	0.63464	3.9477	7.51579e-06	0.000324629	False
362701	calpain 13	Capn13	0.527824	6.64745	7.56646e-06	0.000324956	False
298683	von Willebrand factor A domain containing 1	Vwa1	0.632513	3.58573	7.57615e-06	0.000324956	False
500261	membrane associated guanylate kinase, WW and PDZ domain containing 1	Magi1	-0.439929	5.41563	7.69091e-06	0.000328434	False
171109	dual specificity phosphatase 5	Dusp5	0.59358	4.05273	7.71059e-06	0.000328434	False
81812	thyroid hormone receptor alpha	Thra	-0.442708	5.8105	7.82071e-06	0.000330851	False
58854	proteasome subunit beta 4	Psmb4	0.413126	6.5139	7.8211e-06	0.000330851	False
304325	transmembrane protein 184A	Tmem184a	-0.482872	7.56343	7.99828e-06	0.000337188	False
29332	stathmin 1	Stmn1	0.497102	4.4403	8.13174e-06	0.000341644	False
313689	dehydrogenase/reductase 3	Dhrs3	-0.403092	5.74985	8.19705e-06	0.000342498	False
25518	peptidylprolyl isomerase A (cyclophilin A)	Ppia	0.451722	8.20449	8.2077e-06	0.000342498	False
113906	heat shock protein family B (small) member 8	Hspb8	-0.466383	5.86903	8.27682e-06	0.000344215	False
361505	CDC42 effector protein 5	Cdc42ep5	0.461486	4.66554	8.4899e-06	0.000351888	False
25675	3-hydroxy-3-methylglutaryl-CoA reductase	Hmgcr	0.424215	6.80019	8.7659e-06	0.000362108	False
24218	ATPase copper transporting beta	Atp7b	-0.560485	5.29201	9.07446e-06	0.000373601	False
360698	transmembrane protein 50B	Tmem50b	-0.464448	8.75749	9.14572e-06	0.000375124	False
65195	potassium voltage-gated channel subfamily D member 3	Kcnd3	-0.687426	3.79414	9.1724e-06	0.000375124	False
361749	interleukin 33	Il33	0.437156	7.15327	9.43847e-06	0.000384727	False
64305	sulfotransferase family 1B member 1	Sult1b1	0.402582	5.6877	9.75664e-06	0.000396384	False
619561	acyl-CoA synthetase family member 2	Acsf2	-0.406097	6.20756	9.96041e-06	0.000403331	False
59324	potassium two pore domain channel subfamily K member 1	Kcnk1	0.431968	6.23679	1.02198e-05	0.000412281	False
286897	dpy-30 histone methyltransferase complex regulatory subunit	Dpy30	0.409423	4.94609	1.02525e-05	0.000412281	False
691807	hypothetical protein LOC691807	LOC691807	0.411025	6.80259	1.02819e-05	0.000412281	False
297910	solute carrier family 26 member 7	Slc26a7	-0.544782	6.71118	1.15477e-05	0.000461532	False
297339	capping actin protein, gelsolin like	Capg	0.813485	4.42242	1.16166e-05	0.000462786	False
83785	vascular endothelial growth factor A	Vegfa	-0.450518	7.65849	1.20624e-05	0.000478994	False
122772	ribosomal protein S20	Rps20	0.458773	7.91589	1.22272e-05	0.000483977	False
25348	ribosomal protein S29	Rps29	0.484341	8.25402	1.23365e-05	0.000485609	False
361550	GRAM domain containing 1A	Gramd1a	-0.388226	6.02436	1.23473e-05	0.000485609	False
58812	apelin	Apln	1.52107	1.61173	1.2823e-05	0.000502712	False
29672	proteasome subunit alpha 5	Psma5	0.379722	5.64024	1.31666e-05	0.000514542	False
117270	trefoil factor 1	Tff1	0.522236	13.451	1.32847e-05	0.000517515	False
360904	iduronidase, alpha-L-	Idua	-0.429363	6.01258	1.34244e-05	0.000521308	False
316426	spermatogenesis associated, serine-rich 2-like	Spats2l	0.455248	5.05586	1.36411e-05	0.000528058	False
367308	alkaline phosphatase, placental-like 2	Alppl2	-1.25384	1.24833	1.39852e-05	0.000539681	False
309527	cholesterol 25-hydroxylase	Ch25h	1.00102	2.02646	1.41814e-05	0.00054554	False
361422	coactosin-like F-actin binding protein 1	Cotl1	0.598372	6.22311	1.48664e-05	0.00057011	False
282843	sorbin and SH3 domain containing 3	Sorbs3	-0.519088	5.78309	1.50555e-05	0.000574876	False
171123	rabphilin 3A-like (without C2 domains)	Rph3al	-0.488662	4.23922	1.50841e-05	0.000574876	False
680891	splicing factor 3b, subunit 5	Sf3b5	0.405483	4.90562	1.51612e-05	0.000576034	False
309953	transmembrane protein 161B	Tmem161b	-0.389551	5.14386	1.52648e-05	0.000578184	False
171411	transmembrane protein 176B	Tmem176b	0.393293	6.32313	1.56942e-05	0.000592626	False
300053	kinesin family member C2	Kifc2	-0.465499	4.41598	1.61047e-05	0.000605473	False
681037	PRELI domain containing 2	Prelid2	-0.613213	4.59888	1.61328e-05	0.000605473	False
299112	DNA polymerase epsilon 2, accessory subunit	Pole2	1.36476	0.800921	1.68039e-05	0.000628467	False
363004	proline rich 13	Prr13	0.524275	6.54403	1.68476e-05	0.000628467	False
302562	proteolipid protein 2	Plp2	0.402287	6.16975	1.74033e-05	0.000647236	False
679787	C-type lectin domain containing 5A	Clec5a	1.6538	0.0999124	1.76161e-05	0.000653175	False
406864	chloride intracellular channel 1	Clic1	0.45932	7.05557	1.80599e-05	0.000667621	False
59103	prostaglandin E synthase	Ptges	1.03252	2.07428	1.84108e-05	0.000678552	False
25434	SPARC like 1	Sparcl1	-0.666229	7.69198	1.86961e-05	0.00068701	False
56759	ribonuclease A family member 4	Rnase4	0.434404	4.50964	1.89288e-05	0.000693491	False
360518	glutamine-fructose-6-phosphate transaminase 2	Gfpt2	1.41095	3.32888	1.92909e-05	0.000704662	False
24854	clusterin	Clu	1.15811	9.42758	1.94149e-05	0.000705692	False
304081	chloride intracellular channel 6	Clic6	-0.567814	9.30772	1.94338e-05	0.000705692	False
246233	MACRO domain containing 1	Macrod1	-0.48354	5.3174	1.95412e-05	0.000707506	False
304488	PTC7 protein phosphatase homolog	Pptc7	-0.36796	5.627	2.0034e-05	0.00072322	False
64026	caspase 7	Casp7	0.396061	5.76877	2.01842e-05	0.000726514	False
308015	chloride channel accessory 1	Clca1	2.4599	6.90484	2.04e-05	0.00073214	False
259275	osteoclast stimulating factor 1	Ostf1	0.368018	6.14797	2.05144e-05	0.000733912	False
29637	3-hydroxy-3-methylglutaryl-CoA synthase 1	Hmgcs1	0.456794	7.68132	2.05686e-05	0.000733912	False
64158	tubulin, alpha 1A	Tuba1a	0.518651	5.08574	2.06468e-05	0.000734573	False
24615	S100 calcium-binding protein A4	S100a4	1.3643	3.55554	2.08441e-05	0.000738152	False
313040	CUB and Sushi multiple domains 2	Csmd2	-0.690603	3.17385	2.08673e-05	0.000738152	False
313997	membrane bound O-acyltransferase domain containing 2	Mboat2	0.532424	4.24145	2.10804e-05	0.000743554	False
295037	microsomal glutathione S-transferase 2	Mgst2	0.416955	6.33646	2.12088e-05	0.000745405	False
294235	immediate early response 3	Ier3	0.681308	6.13724	2.1254e-05	0.000745405	False
298575	PTEN induced putative kinase 1	Pink1	-0.430855	6.68456	2.1441e-05	0.000749827	False
301345	cyclin and CBS domain divalent metal cation transport mediator 3	Cnnm3	-0.369692	5.43805	2.15415e-05	0.000751207	False
64558	frizzled class receptor 4	Fzd4	-0.455044	6.63498	2.16395e-05	0.000752106	False
679949	ubiquitin-conjugating enzyme E2Q family-like 1	Ube2ql1	-0.659277	4.49066	2.16895e-05	0.000752106	False
298300	tetratricopeptide repeat domain 22	Ttc22	0.424264	5.15773	2.18712e-05	0.000756276	False
81521	moesin	Msn	0.445337	6.03353	2.20615e-05	0.000759483	False
29359	phospholipase A2, group X	Pla2g10	0.416598	4.81428	2.20873e-05	0.000759483	False
296973	bisphosphoglycerate mutase	Bpgm	0.489547	4.04407	2.24774e-05	0.000770743	False
24472	heat shock 70kD protein 1A	Hspa1a	0.847218	3.86668	2.29696e-05	0.000785434	False
81524	nuclear factor 1 X	Nf1x	-0.439246	4.88907	2.30836e-05	0.000787145	False
360626	keratin 19	Krt19	0.524825	8.66225	2.32046e-05	0.000789086	False
362558	LDL receptor related protein 8	Lrp8	0.96888	2.14565	2.3381e-05	0.000792892	False
286921	aldo-keto reductase family 1, member B8	Akr1b8	0.56782	9.19268	2.3524e-05	0.000795551	False
317252	ERCC excision repair 6 like, spindle assembly checkpoint helicase	Ercc6l	1.28495	0.885948	2.37665e-05	0.000801549	False
299569	A-kinase anchoring protein 8 like	Akap8l	-0.407607	5.12421	2.3874e-05	0.000802976	False
289211	Fc fragment of IgG receptor IIb	Fcgr2b	1.24172	2.39003	2.43139e-05	0.000815542	False
84406	heparan sulfate-glucosamine 3-sulfotransferase 1	Hs3st1	0.554782	3.914	2.4524e-05	0.000820355	False
315663	exophilin 5	Exph5	-0.436762	4.73769	2.48046e-05	0.00082613	False
502367	bolA family member 2	Bola2	0.402202	5.29808	2.48309e-05	0.00082613	False
114247	schlafen 4	Slfn4	0.74233	3.31442	2.51501e-05	0.000834495	False
310621	IQ motif containing GTPase activating protein 3	Iqgap3	0.6994	3.22643	2.54946e-05	0.000840364	False
289014	mitogen-activated protein kinase-activated protein kinase 2	Mapkapk2	-0.493008	7.49878	2.55256e-05	0.000840364	False
361884	methylcrotonoyl-CoA carboxylase 2	Mccc2	-0.482384	7.66641	2.5543e-05	0.000840364	False
360649	Ribosomal_L22 domain containing protein RGD1359290	RGD1359290	0.37513	5.77792	2.56e-05	0.000840364	False
501195	similar to D1Ertd622e protein	RGD1562136	0.375603	6.47062	2.56782e-05	0.000840689	False
362474	alcohol dehydrogenase, iron containing, 1	Adhfe1	-0.50342	7.12066	2.59579e-05	0.000847591	False
309145	similar to RIKEN cDNA 1810055G02	RGD1311946	0.526744	4.21716	2.64519e-05	0.000861438	False
299940	syntrophin, beta 1	Sntb1	-0.440839	5.99443	2.69333e-05	0.000874589	False
360605	epsin 3	Epn3	-0.478703	5.12392	2.70455e-05	0.000874589	False
83788	septin 9	2009-09-01	-0.390878	5.78298	2.70689e-05	0.000874589	False
289720	prosaposin-like 1	Psapl1	0.407958	6.45098	2.74535e-05	0.000883794	False
362456	Rho GDP dissociation inhibitor beta	Arhgdib	0.606018	3.84166	2.74974e-05	0.000883794	False
308602	transmembrane protein 86A	Tmem86a	-0.489399	6.87006	2.78751e-05	0.000893601	False
100910806	tripartite motif containing 15	Trim15	2.20365	0.322391	2.95318e-05	0.000944249	False
79113	FGR proto-oncogene, Src family tyrosine kinase	Fgr	1.40304	0.867032	2.97864e-05	0.000949923	False
246327	DNA primase subunit 1	Prim1	0.483903	4.09925	3.04462e-05	0.000968458	False
499655	CDC28 protein kinase regulatory subunit 1B	Cks1b	0.563975	3.54923	3.05889e-05	0.000970487	False
192129	vacuole membrane protein 1	Vmp1	0.427774	6.78711	3.0807e-05	0.000974894	False
681415	ERH, mRNA splicing and mitosis factor	Erh	0.392781	5.74985	3.11035e-05	0.000981754	False
494192	Mycbp associated protein	Mycbpap	-0.65273	4.11429	3.17476e-05	0.00099952	False
296554	tubulin, beta 4B class IVb	Tubb4b	0.413844	7.2088	3.18651e-05	0.00100042	False
308944	suppression of tumorigenicity 5	St5	-0.404059	7.02928	3.19388e-05	0.00100042	False
24533	lactate dehydrogenase A	Ldha	0.420708	8.77688	3.23685e-05	0.00101008	False
29373	bone morphogenetic protein 2	Bmp2	0.421517	5.26585	3.24111e-05	0.00101008	False
84393	kinesin family member 4A	Kif4a	0.880555	2.55456	3.25812e-05	0.00101081	False
291095	GDP-mannose 4, 6-dehydratase	Gmds	0.405845	6.84129	3.26712e-05	0.00101081	False
29195	chondroadherin	Chad	-0.666052	3.66947	3.27322e-05	0.00101081	False
25291	annexin A3	Anxa3	0.44135	4.45887	3.27632e-05	0.00101081	False
305886	solute carrier family 22, member 17	Slc22a17	-0.418168	4.61671	3.35649e-05	0.00103296	False
94338	sphingomyelin phosphodiesterase 3	Smpd3	0.388746	6.38097	3.36879e-05	0.00103416	False
305078	laminin subunit beta 3	Lamb3	0.532076	5.14184	3.46304e-05	0.00106045	False
24852	tropomyosin 4	Tpm4	0.516032	8.0016	3.51795e-05	0.00107459	False
171081	colony stimulating factor 2 receptor beta common subunit	Csf2rb	1.19616	1.80337	3.54395e-05	0.00107985	False
688717	SRA stem-loop interacting RNA binding protein	Slirp	0.438821	4.42486	3.60817e-05	0.00109671	False
114554	phosphatidylinositol 4-kinase type 2 alpha	Pi4k2a	-0.531394	3.82133	3.89631e-05	0.00118137	False
315265	twinfilin actin-binding protein 1	Twf1	0.384549	6.51728	3.9939e-05	0.00120798	False
50665	thymosin, beta 10	Tmsb10	0.485586	7.43081	4.045e-05	0.00122044	False
360564	Tax1 binding protein 3	Tax1bp3	0.386215	5.58591	4.20109e-05	0.00126444	False
289949	family with sequence similarity 3, member D	Fam3d	0.420228	8.41329	4.32643e-05	0.00129795	False
83629	solute carrier family 12 member 2	Slc12a2	-0.501679	8.71343	4.33353e-05	0.00129795	False
360918	platelet factor 4	Pf4	1.2367	2.2216	4.37848e-05	0.00130823	False
361388	GRB2-associated binding protein 1	Gab1	-0.390359	4.7644	4.44498e-05	0.00132488	False
83791	farnesyl diphosphate synthase	Fdps	0.392968	7.13806	4.47654e-05	0.00133107	False
89808	C-X3-C motif chemokine ligand 1	Cx3cl1	0.712516	5.03246	4.52282e-05	0.00134159	False
25263	mal, T-cell differentiation protein	Mal	0.477019	8.25799	4.60782e-05	0.00136352	False
25288	acyl-CoA synthetase long-chain family member 1	Acsl1	-0.428781	7.69764	4.82998e-05	0.00142583	False
29735	solute carrier family 16 member 7	Slc16a7	-0.484358	5.46459	4.86184e-05	0.0014318	False
65046	adaptor-related protein complex 2, sigma 1 subunit	Ap2s1	0.352018	5.75353	4.88556e-05	0.00143535	False
192245	heat shock protein family B (small) member 6	Hspb6	-0.436879	5.58567	4.93391e-05	0.00144411	False
25367	adenosine deaminase, RNA-specific, B1	Adarb1	-0.548193	4.28987	4.93882e-05	0.00144411	False
307644	kinesin family member C3	Kifc3	-0.394352	4.93207	5.02474e-05	0.00146512	False
170847	potassium voltage-gated channel subfamily J member 15	Kcnj15	-0.519626	5.8434	5.03448e-05	0.00146512	False
294804	retinoic acid induced 14	Rai14	0.453364	4.67844	5.10819e-05	0.00148306	False
307949	pecanex homolog 2	Pcnx2	-0.534907	3.70641	5.1345e-05	0.00148719	False
100361269	small nuclear ribonucleoprotein polypeptide A'	Snrpa1	0.502869	4.01244	5.17669e-05	0.00149589	False
117053	ribosomal protein S15a	Rps15a	0.42135	8.01267	5.56249e-05	0.00160361	False
311055	tetratricopeptide repeat, ankyrin repeat and coiled-coil containing 1	Tanc1	-0.396761	5.20611	5.6311e-05	0.0016196	False
689134	Sec61 translocon gamma subunit	Sec61g	0.397081	5.72067	5.72832e-05	0.00164372	False
24907	dystrophin	Dmd	-0.386909	6.41937	5.7491e-05	0.00164585	False
492821	phorbol-12-myristate-13-acetate-induced protein 1	Pmaip1	0.606943	4.41587	5.77707e-05	0.00164905	False
24223	beta-2 microglobulin	B2m	0.426485	8.818	5.78709e-05	0.00164905	False
24426	glutathione S-transferase pi 1	Gstp1	0.441715	8.00919	5.95207e-05	0.00169215	False
100363539	mitochondrial ribosomal protein L33	Mrpl33	0.392902	4.79095	5.98679e-05	0.0016981	False
308709	synemin	Synm	-0.704275	6.66583	6.05054e-05	0.00171223	False
64535	fibroblast growth factor binding protein 1	Fgfbp1	0.423418	6.8447	6.10673e-05	0.00172417	False
296732	SWI/SNF related, matrix associated, actin dependent regulator of chromatin, subfamily d, member 3	Smarcd3	-0.493057	4.77784	6.19866e-05	0.00174553	False
293173	fatty acyl CoA reductase 1	Far1	0.373412	6.07304	6.21074e-05	0.00174553	False
100912032	ribosomal protein S27a	Rps27a	0.470125	8.62972	6.22721e-05	0.00174617	False
24309	D-box binding PAR bZIP transcription factor	Dbp	-0.373796	5.33683	6.36698e-05	0.00178131	False
25402	caspase 3	Casp3	0.364544	5.49628	6.41052e-05	0.00178942	False
191575	NME/NM23 nucleoside diphosphate kinase 1	Nme1	0.392706	4.67906	6.46137e-05	0.00179954	False
311425	ADAM metallopeptidase domain 33	Adam33	-0.98651	2.97786	6.54257e-05	0.00181804	False
303394	ubiquitin specific peptidase 32	Usp32	-0.363198	6.40748	6.58964e-05	0.00182699	False
140939	tripartite motif containing 63	Trim63	-1.42024	0.854054	6.62002e-05	0.00183129	False
297109	maturin, neural progenitor differentiation regulator homolog	Mturn	-0.493393	4.49593	6.65686e-05	0.00183735	False
296883	replication protein A3	Rpa3	0.539652	3.80915	6.67851e-05	0.00183921	False
500364	sarcospan	Sspn	-0.713875	3.21356	6.74735e-05	0.00185375	False
113959	complement C5a receptor 1	C5ar1	1.0747	2.4465	6.76144e-05	0.00185375	False
290533	sarcolemma associated protein	Slmap	-0.394075	7.50125	6.83725e-05	0.00187037	False
64638	ribosomal protein L28	Rpl28	0.4147	8.27588	6.90576e-05	0.00188492	False
360887	coenzyme Q8A	Coq8a	-0.392009	7.0579	6.99335e-05	0.0019046	False
301059	myeloid differentiation primary response 88	Myd88	0.464237	5.13724	7.05031e-05	0.00191588	False
83476	cysteine-rich, angiogenic inducer, 61	Cyr61	0.483286	4.88021	7.13058e-05	0.00193342	False
314539	MACC1, MET transcriptional regulator	Macc1	0.367428	6.55876	7.21394e-05	0.00195173	False
57301	C-C motif chemokine receptor 1	Ccr1	1.38696	0.136959	7.24317e-05	0.00195534	False
94266	ribosomal protein S27	Rps27	0.441227	8.54456	7.29686e-05	0.00196552	False
474147	mindbomb E3 ubiquitin protein ligase 2	Mib2	-0.42965	5.00416	7.33552e-05	0.00197162	False
245977	adhesion G protein-coupled receptor F5	Adgrf5	-0.341487	5.85046	7.38858e-05	0.00197796	False
25697	cathepsin L	Ctsl	0.429474	7.51973	7.39125e-05	0.00197796	False
296583	NACC family member 2	Nacc2	-0.413908	4.75794	7.41763e-05	0.00198072	False
361537	Tyro protein tyrosine kinase binding protein	Tyrobp	1.14708	2.95299	7.44556e-05	0.00198387	False
499567	RGD1565641	RGD1565641	0.460029	4.64521	7.53084e-05	0.00200226	False
25347	ribosomal protein L39	Rpl39	0.419359	6.81236	7.79379e-05	0.00206531	False
170808	calpain 8	Capn8	0.432592	7.26385	7.80154e-05	0.00206531	False
60566	synaptotagmin 8	Syt8	0.407121	5.60633	7.81956e-05	0.00206564	False
311078	proteasome 26S subunit, non-ATPase 14	Psmd14	0.376195	5.30353	7.85578e-05	0.00207076	False
689853	C-type lectin domain family 2, member E	Clec2e	0.741068	2.95761	7.94023e-05	0.00208855	False
363140	Ras association domain family member 1	Rassf1	0.47847	3.91079	7.9591e-05	0.00208905	False
81813	Kruppel-like factor 10	Klf10	0.423921	5.66443	8.06878e-05	0.00211333	False
306860	glucosaminyl (N-acetyl) transferase 2, I-branching enzyme	Gcnt2	-0.422729	4.47265	8.09532e-05	0.00211578	False
25267	platelet derived growth factor receptor alpha	Pdgfra	0.383547	6.55454	8.30149e-05	0.00216507	False
681050	polyamine-modulated factor 1	Pmf1	0.76195	2.61625	8.44148e-05	0.00219693	False
361882	Rho guanine nucleotide exchange factor 28	Arhgef28	-0.335158	5.73913	8.54903e-05	0.00222022	False
297418	gastrokine 1	Gkn1	0.486652	14.8113	8.57845e-05	0.00222317	False
116457	mitogen-activated protein kinase 8 interacting protein 1	Mapk8ip1	-0.414155	5.63866	8.68296e-05	0.00224553	False
681429	ribosomal protein S27-like	Rps27l	0.372701	6.332	8.74721e-05	0.00225023	False
361303	LIM zinc finger domain containing 2	Lims2	-0.524125	5.04936	8.77231e-05	0.00225023	False
24303	cytochrome P450, family 2, subfamily d, polypeptide 3	Cyp2d3	0.661951	3.44867	8.7735e-05	0.00225023	False
114592	aurora kinase B	Aurkb	0.675485	2.95866	8.77423e-05	0.00225023	False
103691034	paternally expressed 3	Peg3	-0.432077	4.35129	8.80842e-05	0.0022543	False
100363074	acyl-CoA thioesterase 11	Acot11	-0.626476	3.46019	8.95977e-05	0.00228759	False
312705	complement C1r	C1r	0.413722	6.07282	8.98634e-05	0.00228759	False
59086	transforming growth factor, beta 1	Tgfb1	0.430328	4.32926	8.99723e-05	0.00228759	False
296623	mitoguardin 2	Miga2	-0.367593	5.3294	9.01286e-05	0.00228759	False
140720	BAALC, MAP3K1 and KLF4 binding	Baalc	-1.70644	-0.37723	9.21222e-05	0.00233208	False
252900	diacylglycerol O-acyltransferase 2	Dgat2	0.589136	4.719	9.22601e-05	0.00233208	False
681433	repulsive guidance molecule family member B	Rgmb	-0.453219	5.49261	9.26894e-05	0.00233813	False
363054	myelin protein zero-like 3	Mpzl3	0.38901	4.97744	9.34197e-05	0.00235173	False
25261	inhibitor of DNA binding 1, HLH protein	Id1	0.399175	6.79891	9.55917e-05	0.0024015	False
287828	Jupiter microtubule associated homolog 1	Jpt1	0.424408	5.27345	9.5808e-05	0.00240203	False
100359592	paralemmin 3	Palm3	-0.637982	3.49578	9.68235e-05	0.00242255	False
54318	eukaryotic translation initiation factor 2 subunit alpha	Eif2s1	0.331997	5.93478	9.75297e-05	0.00243528	False
362214	NOP56 ribonucleoprotein	Nop56	0.382288	5.23305	9.81157e-05	0.00244495	False
291234	marker of proliferation Ki-67	Mki67	0.648335	4.7159	9.9146e-05	0.00246563	False
360619	gasdermin A	Gsdma	1.07752	2.29911	9.9871e-05	0.00247865	False
691703	C2 calcium-dependent domain containing 4A	C2cd4a	1.09949	1.16565	0.000102338	0.00253477	False
287061	rogdi homolog	Rogdi	-0.461296	5.43103	0.000103468	0.00255761	False
306222	LSM5 homolog, U6 small nuclear RNA and mRNA degradation associated	Lsm5	0.495448	3.71092	0.000105652	0.00260307	False
290553	musculoskeletal, embryonic nuclear protein 1	Mustn1	-0.564407	3.83948	0.00010573	0.00260307	False
297455	LSM3 homolog, U6 small nuclear RNA and mRNA degradation associated	Lsm3	0.441287	4.0393	0.000106234	0.00261027	False
362041	ribosomal protein L34	Rpl34	0.501105	7.83096	0.000110687	0.00271425	False
294270	RT1 class II, locus Db1	RT1-Db1	0.446609	5.38195	0.000112328	0.00274901	False
294093	ankyrin repeat domain 22	Ankrd22	0.378567	5.25454	0.000113557	0.00277359	False
24950	steroid 5 alpha-reductase 1	Srd5a1	0.410134	4.96987	0.000114146	0.00278244	False
116720	phosphatidylinositol-4-phosphate 3-kinase, catalytic subunit type 2 gamma	Pik3c2g	-0.412475	7.61387	0.000114529	0.00278628	False
295703	serpin family G member 1	Serping1	0.380192	6.87192	0.000115503	0.00280322	False
680532	SEM1, 26S proteasome complex subunit	Sem1	0.358582	6.22331	0.000115681	0.00280322	False
363235	ALS2, alsin Rho guanine nucleotide exchange factor	Als2	-0.35723	5.1701	0.000116074	0.00280721	False
89825	nucleosome assembly protein 1-like 1	Nap1l1	0.378334	5.95665	0.00011736	0.00283274	False
309622	RT1 class II, locus Bb	RT1-Bb	0.498102	4.23546	0.000118	0.0028381	False
360478	small integral membrane protein 22	Smim22	0.427894	4.55886	0.000118262	0.0028381	False
54281	furin (paired basic amino acid cleaving enzyme)	Furin	-0.531646	11.0583	0.000118273	0.0028381	False
310395	nocturnin	Noct	-0.466739	4.63017	0.000118563	0.00283952	False
58940	H2A histone family, member Z	H2afz	0.353798	5.72118	0.00012019	0.00287288	False
500723	zinc finger protein 839	Zfp839	-0.777538	2.54118	0.000123265	0.00294069	False
50566	gremlin 1, DAN family BMP antagonist	Grem1	0.487043	5.29395	0.000125077	0.00297601	False
363256	SPEG complex locus	Speg	-0.605236	4.26479	0.000125229	0.00297601	False
300067	SH3-domain binding protein 1	Sh3bp1	0.51921	3.7623	0.000128133	0.00303915	False
307759	glutamic--pyruvic transaminase 2	Gpt2	-0.378921	5.86432	0.000130348	0.00308574	False
100363253	5'-nucleotidase, cytosolic II	Nt5c2	0.418119	4.65712	0.000132679	0.00313489	False
502902	C-type lectin domain containing 7A	Clec7a	1.08415	1.2076	0.000134743	0.00317757	False
291434	ribosomal protein L17	Rpl17	0.403852	7.90196	0.000135145	0.00317998	False
207123	similar to RIKEN cDNA D230025D16Rik	RGD621098	-0.37156	4.76052	0.000135362	0.00317998	False
81506	bone marrow stromal cell antigen 1	Bst1	1.2829	0.286332	0.000136406	0.00319839	False
290029	purine nucleoside phosphorylase	Pnp	0.331025	6.10269	0.000137682	0.00322217	False
362262	elastin microfibril interfacer 3	Emilin3	-1.1438	1.56668	0.000139398	0.00325614	False
24831	thyroid hormone receptor beta	Thrb	-0.371504	4.6407	0.000139864	0.0032565	False
64157	dimethylarginine dimethylaminohydrolase 1	Ddah1	0.394246	5.41065	0.000139942	0.0032565	False
360739	RAN binding protein 1	Ranbp1	0.412192	5.01285	0.000140893	0.00327244	False
315920	V-set and immunoglobulin domain containing 1	Vsig1	0.388802	8.44196	0.000145045	0.00336253	False
246253	adiponectin, C1Q and collagen domain containing	Adipoq	2.11845	3.61784	0.00014591	0.00337622	False
297419	gastrokine 2	Gkn2	0.474038	13.6176	0.000147077	0.0033968	False
54315	uncoupling protein 2	Ucp2	0.461919	8.51154	0.000147351	0.0033968	False
363040	ST3 beta-galactoside alpha-2,3-sialyltransferase 4	St3gal4	1.48395	4.0452	0.0001501	0.0034537	False
84013	hydroxysteroid (17-beta) dehydrogenase 12	Hsd17b12	0.389653	5.54522	0.00015076	0.00346241	False
79430	chloride voltage-gated channel Kb	Clcnkb	-0.907925	2.14016	0.000151256	0.00346733	False
366960	MAF bZIP transcription factor F	Maff	0.626901	3.54486	0.000153177	0.00350485	False
64036	CD55 molecule, decay accelerating factor for complement	Cd55	0.510363	4.12649	0.000154725	0.00353371	False
25576	tyrosine 3-monooxygenase/tryptophan 5-monooxygenase activation protein, eta	Ywhah	0.409656	7.03324	0.000155426	0.00354314	False
83835	cysteine-rich hydrophobic domain 2	Chic2	0.453828	4.26016	0.000156806	0.00356799	False
29140	stannin	Snn	-0.470567	4.04587	0.000158193	0.00359291	False
113955	glycoprotein nmb	Gpnmb	0.412916	5.20767	0.000160077	0.00362324	False
65152	phosphofructokinase, muscle	Pfkm	-0.474607	5.95599	0.000160399	0.00362324	False
310644	PBX homeobox interacting protein 1	Pbxip1	-0.397136	6.91694	0.000160411	0.00362324	False
63839	four and a half LIM domains 2	Fhl2	0.406806	5.55376	0.000162226	0.003655	False
360804	cyclin-dependent kinase 2 associated protein 1	Cdk2ap1	0.332637	6.15453	0.000162411	0.003655	False
25626	keratin 8	Krt8	0.432871	10.8407	0.000162967	0.0036608	False
64203	branched chain amino acid transaminase 2	Bcat2	-0.429828	7.95639	0.000164215	0.00368213	False
301013	shisa family member 5	Shisa5	0.330823	5.93174	0.000166272	0.00372147	False
25439	coagulation factor II (thrombin) receptor	F2r	0.340457	5.32843	0.000168554	0.00376571	False
29531	4-hydroxyphenylpyruvate dioxygenase	Hpd	-1.13135	0.95012	0.000171963	0.00382855	False
301562	collagen type IV alpha 4 chain	Col4a4	-0.711561	3.26649	0.000172081	0.00382855	False
685579	ribonucleotide reductase catalytic subunit M1	Rrm1	0.363277	5.27244	0.0001723	0.00382855	False
307855	fatty acid 2-hydroxylase	Fa2h	-0.443955	7.54391	0.000173622	0.00385096	False
287678	keratin 23	Krt23	0.393671	5.70163	0.000174289	0.00385882	False
498257	family with sequence similarity 163, member A	Fam163a	-1.13025	1.54684	0.00017616	0.00388753	False
304988	myeloid cell nuclear differentiation antigen	Mnda	1.00567	1.98045	0.000176218	0.00388753	False
25066	poliovirus receptor	PVR	0.430599	4.54067	0.000178547	0.00392993	False
89811	vascular endothelial growth factor B	Vegfb	-0.38104	4.79269	0.000178778	0.00392993	False
294972	methylcrotonoyl-CoA carboxylase 1	Mccc1	-0.40295	6.21597	0.000179906	0.00394491	False
305714	THO complex 7	Thoc7	0.353336	5.20095	0.000180321	0.00394491	False
246755	breast carcinoma amplified sequence 1	Bcas1	0.364067	7.43503	0.000180421	0.00394491	False
170724	acidic nuclear phosphoprotein 32 family member B	Anp32b	0.329878	6.23352	0.000186951	0.00408044	False
303798	ARVCF, delta catenin family member	Arvcf	-0.3481	5.06705	0.000189276	0.00411553	False
294853	keratin 18	Krt18	0.426336	9.14678	0.000189836	0.00411553	False
296408	family with sequence similarity 210, member B	Fam210b	-0.40487	4.3291	0.00018988	0.00411553	False
114851	cyclin-dependent kinase inhibitor 1A	Cdkn1a	0.361873	5.85459	0.000189896	0.00411553	False
81708	aldehyde dehydrogenase 6 family, member A1	Aldh6a1	-0.423222	8.96617	0.000190544	0.00412232	False
65166	SEC11 homolog A, signal peptidase complex subunit	Sec11a	0.327391	5.69838	0.000193849	0.00418645	False
306327	transmembrane protein 38a	Tmem38a	-0.569394	3.3143	0.000195492	0.00421455	False
294279	collagen type XI alpha 2 chain	Col11a2	-0.835226	2.14171	0.000197775	0.0042516	False
500638	family with sequence similarity 110, member C	Fam110c	0.516275	3.71983	0.000197901	0.0042516	False
364755	endoplasmic reticulum oxidoreductase 1 beta	Ero1b	-0.397822	5.9468	0.000199988	0.00428894	False
81505	epithelial membrane protein 3	Emp3	0.652044	4.03669	0.000200445	0.00429126	False
115769	tight junction protein 2	Tjp2	0.373687	6.79581	0.00020287	0.00433564	False
361596	isocitrate dehydrogenase (NADP(+)) 2, mitochondrial	Idh2	-0.450401	9.03392	0.00020358	0.00434328	False
316017	ALS2 C-terminal like	Als2cl	-0.517627	3.84687	0.000204462	0.00435454	False
84400	proline and arginine rich end leucine rich repeat protein	Prelp	-0.466814	5.79845	0.000205517	0.00436944	False
304407	claudin 4	Cldn4	0.967885	2.33051	0.0002062	0.00437641	False
297077	transmembrane protein 176A	Tmem176a	0.381115	5.55248	0.000206897	0.00438365	False
296368	ubiquitin-conjugating enzyme E2C	Ube2c	0.872201	2.65838	0.000207681	0.00438534	False
25462	heat shock protein family E member 1	Hspe1	0.333475	5.79983	0.000207689	0.00438534	False
81509	bradykinin receptor B1	Bdkrb1	1.38974	0.159622	0.000210577	0.0044387	False
85494	transmembrane protein adipocyte associated 1	Tpra1	-0.354724	5.3854	0.000212147	0.00446414	False
362918	MTSS1, I-BAR domain containing	Mtss1	-0.31845	5.70519	0.000213164	0.00447155	False
114491	Cbp/p300-interacting transactivator, with Glu/Asp-rich carboxy-terminal domain, 4	Cited4	-0.487784	4.53429	0.000213561	0.00447155	False
361970	tripartite motif-containing 2	Trim2	-0.347128	5.92357	0.000213588	0.00447155	False
293860	filamin A	Flna	-0.463355	9.46714	0.000215636	0.00450677	False
25692	plasminogen activator, tissue type	Plat	0.453546	4.69476	0.000216695	0.00452121	False
360854	actin related protein 2/3 complex, subunit 5	Arpc5	0.363236	7.00485	0.00021826	0.00454616	False
311088	cordon-bleu WH2 repeat protein-like 1	Cobll1	-0.394967	6.62443	0.000224934	0.00467726	False
24539	lipoprotein lipase	Lpl	-0.364934	7.69377	0.000227595	0.0047246	False
316009	plexin B1	Plxnb1	-0.50945	4.32772	0.00022798	0.00472463	False
122799	ribosomal protein s25	Rps25	0.405697	7.72222	0.000229565	0.00474948	False
689414	solute carrier family 25, member 42	Slc25a42	-0.373019	4.67442	0.000232036	0.00479256	False
362455	family with sequence similarity 234, member B	Fam234b	-0.409012	6.56138	0.000236069	0.00486604	False
366061	polypeptide N-acetylgalactosaminyltransferase 3	Galnt3	0.361625	7.50268	0.000236385	0.00486604	False
313838	CDC42 effector protein 3	Cdc42ep3	0.387066	4.29764	0.0002385	0.00490139	False
25549	solute carrier family 18 member A2	Slc18a2	-0.378023	5.33185	0.000239426	0.00491011	False
360161	NIMA-related kinase 6	Nek6	0.458049	4.98294	0.000239882	0.00491011	False
362993	Rho family GTPase 1	Rnd1	0.792705	3.18722	0.000240121	0.00491011	False
80878	solute carrier family 16 member 3	Slc16a3	0.695324	3.6203	0.000243525	0.00497147	False
50871	hippocalcin-like 1	Hpcal1	-0.404143	7.28138	0.000247698	0.00504828	False
297568	alpha-1-inhibitor III	LOC297568	-0.509251	4.23926	0.000249137	0.00506093	False
25244	branched chain ketoacid dehydrogenase E1, alpha polypeptide	Bckdha	-0.390199	7.17569	0.000249141	0.00506093	False
690163	3-oxoacid CoA transferase 1	Oxct1	-0.422921	7.97056	0.000249594	0.00506178	False
24392	gap junction protein, alpha 1	Gja1	0.333117	6.11856	0.000251468	0.00509139	False
171164	guanylate binding protein 2	Gbp2	0.751161	3.0799	0.000252238	0.00509861	False
299923	N-myc downstream regulated 1	Ndrg1	0.453125	7.34395	0.000253425	0.00511412	False
192362	laminin subunit gamma 2	Lamc2	1.19312	5.97889	0.000253836	0.00511412	False
100190936	ring finger protein 123	Rnf123	-0.318628	5.64715	0.000255026	0.00512969	False
362510	maternal embryonic leucine zipper kinase	Melk	0.954235	2.33287	0.000256658	0.0051541	False
299142	synaptotagmin 16	Syt16	0.464129	4.4701	0.000257531	0.0051632	False
294103	3'-phosphoadenosine 5'-phosphosulfate synthase 2	Papss2	0.349738	6.69188	0.000258995	0.00518411	False
25289	adenylate cyclase 6	Adcy6	-0.393648	7.66081	0.000260114	0.00519805	False
171142	enoyl-CoA hydratase and 3-hydroxyacyl CoA dehydrogenase	Ehhadh	-0.36145	5.71958	0.00026154	0.00521808	False
25695	CCAAT/enhancer binding protein delta	Cebpd	0.804719	4.4688	0.000266666	0.00531175	False
314260	pleckstrin 2	Plek2	0.552684	5.58674	0.000268452	0.00533868	False
287109	potassium channel tetramerization domain containing 5	Kctd5	0.392213	4.85724	0.000268904	0.00533904	False
500366	RAB15 effector protein	Rep15	0.393414	4.94994	0.000269625	0.00534474	False
25734	HCK proto-oncogene, Src family tyrosine kinase	Hck	0.669829	3.0745	0.000271833	0.00537985	False
316583	UDP-GlcNAc:betaGal beta-1,3-N-acetylglucosaminyltransferase 7	B3gnt7	0.443994	6.24687	0.000273883	0.00540802	False
362302	ATP binding cassette subfamily B member 8	Abcb8	-0.356844	4.97577	0.000274135	0.00540802	False
498310	NSL1, MIS12 kinetochore complex component	Nsl1	1.10916	0.688813	0.000276468	0.00543998	False
315740	kinesin family member 23	Kif23	0.465871	3.91195	0.000276639	0.00543998	False
315121	CDC42 effector protein 1	Cdc42ep1	-0.373886	7.919	0.000277361	0.00544547	False
291085	serpin family B member 6A	Serpinb6a	0.419938	7.34007	0.000278165	0.00545256	False
291567	PPARG coactivator 1 beta	Ppargc1b	-0.745177	2.38955	0.0002803	0.00548567	False
100361376	KN motif and ankyrin repeat domains 2	Kank2	-0.346535	6.12885	0.000282227	0.00551463	False
691531	ribosomal protein S28	Rps28	0.433536	7.7023	0.000283274	0.00552631	False
309499	myoferlin	Myof	0.354643	5.38832	0.000285958	0.00556985	False
81686	matrix metallopeptidase 2	Mmp2	0.357206	7.34679	0.000292227	0.0056749	False
59312	SH3 and multiple ankyrin repeat domains 3	Shank3	-0.430754	3.93149	0.000292384	0.0056749	False
304951	NUF2, NDC80 kinetochore complex component	Nuf2	0.780909	2.44761	0.000292734	0.0056749	False
308864	FCH and double SH3 domains 2	Fchsd2	-0.321972	5.87154	0.000294634	0.00569718	False
29186	Cd63 molecule	Cd63	0.371017	8.00894	0.000294811	0.00569718	False
25513	phosphoinositide-3-kinase regulatory subunit 1	Pik3r1	-0.338449	5.86262	0.000295272	0.00569718	False
294286	kinesin family member C1	Kifc1	0.723804	2.71277	0.000298681	0.00575392	False
312052	STEAP2 metalloreductase	Steap2	0.675054	2.7166	0.000300014	0.00577057	False
498587	LIM domain binding 3	Ldb3	-0.579932	3.44213	0.000303325	0.00582299	False
59073	latexin	Lxn	0.517999	3.62423	0.000303867	0.00582299	False
83783	sulfotransferase family 1A member 1	Sult1a1	-0.546089	5.25164	0.000304158	0.00582299	False
362850	angiopoietin-like 4	Angptl4	0.498811	4.02035	0.00030509	0.00583177	False
81766	ribosomal protein L18	Rpl18	0.360705	8.48087	0.000306276	0.00584537	False
361745	SWI/SNF related, matrix associated, actin dependent regulator of chromatin, subfamily a, member 2	Smarca2	-0.328909	5.03705	0.000308164	0.0058723	False
299207	ergosterol biosynthesis 28 homolog	Erg28	0.370964	4.47298	0.000310551	0.00590862	False
100910823	derlin 2	Derl2	0.361842	4.648	0.000314301	0.00597074	False
25664	peroxisome proliferator-activated receptor gamma	Pparg	0.446284	4.99426	0.000317865	0.00602916	False
498131	NEDD4 binding protein 2-like 1	N4bp2l1	-0.418704	4.24948	0.000320533	0.0060704	False
288109	SID1 transmembrane family, member 1	Sidt1	0.326004	5.37925	0.000321083	0.00607147	False
25589	kinase insert domain receptor	Kdr	-0.376673	5.03548	0.000322294	0.00608502	False
25528	signal-regulatory protein alpha	Sirpa	0.391305	4.49218	0.000322865	0.00608647	False
60582	interleukin 1 receptor antagonist	Il1rn	0.729151	3.46874	0.000323388	0.00608701	False
58924	fucosyltransferase 2	Fut2	0.460299	6.56764	0.000330382	0.00620916	False
367323	nudix hydrolase 12	Nudt12	-0.390155	4.4224	0.000332116	0.0062237	False
306766	hypothetical LOC306766	LOC306766	-0.38963	7.27177	0.000332166	0.0062237	False
29752	FAU, ubiquitin like and ribosomal protein S30 fusion	Fau	0.369083	8.06052	0.00033871	0.00633666	False
312538	minichromosome maintenance complex component 2	Mcm2	0.459538	4.13537	0.000340872	0.00636742	False
100360501	ribonuclease/angiogenin inhibitor 1	Rnh1	0.310889	6.03535	0.000341963	0.00637256	False
29517	serum/glucocorticoid regulated kinase 1	Sgk1	0.358489	7.2801	0.000342182	0.00637256	False
311324	dispatched RND transporter family member 2	Disp2	-0.513922	3.55957	0.000342709	0.00637273	False
315714	lysyl oxidase-like 1	Loxl1	0.45114	3.88929	0.000348452	0.00646975	False
24217	ATPase H+/K+ transporting beta subunit	Atp4b	-0.579933	11.9793	0.000349628	0.00648181	False
114087	barrier to autointegration factor 1	Banf1	0.307285	5.54666	0.000352259	0.00652076	False
293854	SRSF protein kinase 3	Srpk3	-1.17545	0.563069	0.000356013	0.00658036	False
289747	oncostatin M	Osm	1.5675	0.140476	0.000367526	0.00678297	False
64561	phosphorylase kinase regulatory subunit alpha 1	Phka1	-0.483712	4.86292	0.000369515	0.00679312	False
298298	24-dehydrocholesterol reductase	Dhcr24	0.377628	7.12783	0.000369531	0.00679312	False
24582	myosin heavy chain 11	Myh11	-0.644081	10.684	0.000369731	0.00679312	False
192246	PHD finger protein 5A	Phf5a	0.330435	5.15865	0.000370963	0.00680559	False
306811	WNK lysine deficient protein kinase 2	Wnk2	-0.6773	3.00841	0.00038096	0.00697861	False
499322	family with sequence similarity 111, member A	Fam111a	0.736892	2.77086	0.000384984	0.00703403	False
29284	ribosomal protein S14	Rps14	0.356729	7.14847	0.000385129	0.00703403	False
316129	ubiquitin-like with PHD and ring finger domains 1	Uhrf1	0.773269	3.06117	0.000393719	0.00718026	False
361661	phosphoseryl-tRNA kinase	Pstk	-0.406571	4.36733	0.000394747	0.00718836	False
360896	estrogen-related receptor gamma	Esrrg	-0.440181	7.4889	0.000398782	0.00725112	False
78962	period circadian regulator 3	Per3	-0.378733	4.90955	0.000404137	0.00733123	False
302884	hypothetical LOC302884	MGC105649	0.619874	6.03058	0.000404379	0.00733123	False
171562	endoplasmic reticulum oxidoreductase 1 alpha	Ero1a	0.371805	6.9426	0.000408517	0.00739536	False
124323	ribosomal protein S23	Rps23	0.358317	8.01199	0.000414695	0.00749617	False
124440	ribosomal protein L41	Rpl41	0.439797	10.207	0.000416451	0.00751527	False
25424	cathepsin E	Ctse	0.376758	10.7858	0.000416972	0.00751527	False
25683	collagen type XII alpha 1 chain	Col12a1	0.43675	5.39803	0.000418316	0.00752153	False
680737	small nuclear ribonucleoprotein polypeptide F	Snrpf	0.398014	4.58839	0.000418542	0.00752153	False
192180	NIP7, nucleolar pre-rRNA processing protein	Nip7	0.469357	3.63752	0.000420149	0.00753942	False
113940	glia maturation factor, gamma	Gmfg	0.691332	3.44903	0.000423376	0.00758627	False
367172	DExH-box helicase 30	Dhx30	-0.336352	5.31688	0.000424633	0.00759773	False
114505	Kruppel like factor 4	Klf4	0.351578	7.75073	0.000429727	0.00767771	False
690285	transmembrane protein 223	Tmem223	0.33533	5.0335	0.000436795	0.00779268	False
156767	TNF receptor superfamily member 1B	Tnfrsf1b	0.645707	2.85975	0.000440538	0.00784808	False
303135	septin 8	2008-09-01	0.32541	5.78014	0.000443674	0.00789252	False
293634	transmembrane protein 171	Tmem171	-0.371819	4.44602	0.000450157	0.00799629	False
292747	fibrillarin	Fbl	0.423261	4.35239	0.000456034	0.00808901	False
309429	KN motif and ankyrin repeat domains 1	Kank1	-0.377174	6.53019	0.000459868	0.00814529	False
361601	abhydrolase domain containing 17C	Abhd17c	0.327317	6.53636	0.000465264	0.00822903	False
366909	solute carrier family 26, member 10	Slc26a10	-0.493322	3.67797	0.000466779	0.00824398	False
58927	ribosomal protein L36	Rpl36	0.361302	7.9529	0.000469088	0.00826502	False
301007	WD repeat domain 6	Wdr6	-0.365807	4.78144	0.000469313	0.00826502	False
25538	ribosomal protein S5	Rps5	0.390402	8.49283	0.00047501	0.00835339	False
81735	neogenin 1	Neo1	-0.318076	6.20847	0.00047975	0.00842472	False
29600	ATPase plasma membrane Ca2+ transporting 4	Atp2b4	-0.681947	6.35639	0.000482998	0.00846967	False
691534	NOP10 ribonucleoprotein	Nop10	0.334824	6.2805	0.000493504	0.00863094	False
291848	matrix metallopeptidase 15	Mmp15	-0.407171	7.07483	0.000493597	0.00863094	False
641315	intermediate filament family orphan 2	Iffo2	-0.532284	5.74505	0.000498549	0.00870516	False
308607	E2F transcription factor 8	E2f8	1.01852	1.23383	0.000500504	0.00872691	False
311508	GDNF-inducible zinc finger protein 1	Gzf1	-0.319106	5.22971	0.000502624	0.00874399	False
83512	fatty acid desaturase 2	Fads2	-0.610561	4.07237	0.000503256	0.00874399	False
298681	SSU72 homolog, RNA polymerase II CTD phosphatase	Ssu72	0.319072	6.25248	0.000503614	0.00874399	False
311311	Meis homeobox 2	Meis2	-0.44576	4.22959	0.00050458	0.00874842	False
83731	potassium calcium-activated channel subfamily M alpha 1	Kcnma1	-0.550706	3.55572	0.000505887	0.00875875	False
360621	cell division cycle 6	Cdc6	0.723002	2.42428	0.000508157	0.00878569	False
140654	ribosomal protein S3	Rps3	0.366702	8.77506	0.000509675	0.00879959	False
24513	isovaleryl-CoA dehydrogenase	Ivd	-0.393324	6.46014	0.000513997	0.00885699	False
282819	peptidylprolyl isomerase F	Ppif	-0.405362	4.93091	0.000514439	0.00885699	False
117048	cadherin 17	Cdh17	1.82072	2.40603	0.000520309	0.00894554	False
300920	claudin 2	Cldn2	2.09552	2.04416	0.00052121	0.00894852	False
362884	transmembrane BAX inhibitor motif containing 4	Tmbim4	0.326099	5.19957	0.000523293	0.00897177	False
155423	annexin A7	Anxa7	0.340821	6.95957	0.000531353	0.00909729	False
83792	stearoyl-Coenzyme A desaturase 2	Scd2	-0.625237	8.07307	0.000533675	0.00911234	False
311842	zyg-11 related, cell cycle regulator	Zer1	-0.299292	5.51758	0.000534333	0.00911234	False
313510	ATP synthase mitochondrial F1 complex assembly factor 1	Atpaf1	-0.300914	5.7008	0.000534452	0.00911234	False
297508	nicotinamide phosphoribosyltransferase	Nampt	0.337083	6.07736	0.000538291	0.00915416	False
300664	ATP binding cassette subfamily G member 4	Abcg4	-0.611965	4.02314	0.000538392	0.00915416	False
498549	A-kinase anchoring protein 11	Akap11	-0.326434	5.40296	0.000540753	0.00917623	False
300033	eukaryotic translation elongation factor 1 delta	Eef1d	0.334623	6.53314	0.000541874	0.00917623	False
297516	copine family member 9	Cpne9	-1.17369	0.950547	0.000541927	0.00917623	False
25334	basic helix-loop-helix family, member a15	Bhlha15	-0.475861	5.97157	0.000542855	0.00917932	False
94268	ephrin A1	Efna1	0.339689	4.71468	0.000544006	0.00918616	False
690899	V-set immunoregulatory receptor	Vsir	0.551486	3.69794	0.000545647	0.00920125	False
307925	spire-type actin nucleation factor 2	Spire2	0.375613	4.6484	0.000547351	0.00921736	False
29553	potassium two pore domain channel subfamily K member 3	Kcnk3	-0.589559	3.50536	0.00055173	0.00927841	False
25682	peroxisome proliferator-activated receptor delta	Ppard	0.343415	6.02339	0.000555763	0.00932795	False
246212	signal-induced proliferation-associated 1 like 1	Sipa1l1	-0.337256	4.62436	0.000557275	0.00932795	False
315219	thymidine phosphorylase	Tymp	-0.364488	5.17004	0.000557564	0.00932795	False
361637	acyl-CoA synthetase medium-chain family member 5	Acsm5	-0.609136	2.99546	0.000557707	0.00932795	False
29157	cyclin G2	Ccng2	0.334584	5.71902	0.00055919	0.00933144	False
498962	acyl-CoA synthetase family member 3	Acsf3	-0.374632	4.29986	0.000559431	0.00933144	False
304982	immunoglobulin superfamily, member 9	Igsf9	0.3372	6.30451	0.000562087	0.00936304	False
290642	coiled-coil domain containing 124	Ccdc124	0.303459	5.33183	0.000576338	0.00958746	False
309150	carnosine synthase 1	Carns1	-0.85008	2.09425	0.00057741	0.00959233	False
25218	VPS52 GARP complex subunit	Vps52	-0.323474	6.24518	0.000578418	0.00959613	False
64307	ribosomal protein L24	Rpl24	0.375818	8.48542	0.000594176	0.00984428	False
29669	proteasome subunit alpha 2	Psma2	0.324083	6.35466	0.000598342	0.00989998	False
83828	general transcription factor IIA, 2	Gtf2a2	0.423686	4.12844	0.000602401	0.00995377	False
29258	ribosomal protein S7	Rps7	0.41278	8.60581	0.000611872	0.0100967	False
124461	protein kinase C and casein kinase substrate in neurons 2	Pacsin2	-0.377671	7.62325	0.000619047	0.0102014	False
298544	SH3 domain binding glutamate-rich protein like 3	Sh3bgrl3	0.412471	5.03855	0.00062275	0.0102403	False
65984	acetoacetyl-CoA synthetase	Aacs	0.337114	5.16562	0.000623072	0.0102403	False
116636	eukaryotic translation initiation factor 4E binding protein 1	Eif4ebp1	0.314417	5.25899	0.000626134	0.0102769	False
29146	jagged 1	Jag1	0.409195	5.05951	0.000627432	0.0102845	False
170929	BCL2-related protein A1	Bcl2a1	1.01569	1.64985	0.000628311	0.0102852	False
304979	immunoglobulin superfamily, member 8	Igsf8	0.595535	3.77398	0.000629588	0.0102925	False
114515	LanC like 1	Lancl1	-0.319269	5.51554	0.000634349	0.0103566	False
305227	septin 11	2011-09-01	0.355815	5.06946	0.000635445	0.0103607	False
298186	tetratricopeptide repeat domain 39B	Ttc39b	0.389835	4.51123	0.0006363	0.0103609	False
691922	5'-nucleotidase domain containing 3	Nt5dc3	-0.555685	3.56371	0.000638378	0.010381	False
498256	immediate early response 5	Ier5	0.514557	3.45532	0.000645219	0.0104784	False
24787	superoxide dismutase 2	Sod2	0.366121	7.37973	0.000664048	0.0107606	False
289632	phosphoglucomutase 2	Pgm2	0.318565	5.20156	0.00066434	0.0107606	False
360606	integrin subunit alpha 3	Itga3	0.304848	5.69671	0.000666218	0.0107768	False
25211	lysozyme 2	Lyz2	1.00789	6.33565	0.000689381	0.0111368	False
310097	sorting nexin 18	Snx18	0.303305	5.26168	0.000694126	0.0111988	False
362715	dystrobrevin, beta	Dtnb	-0.503779	4.05697	0.0006973	0.0112347	False
81757	RAS like proto-oncogene A	Rala	0.302949	5.18538	0.000698177	0.0112347	False
54251	FMS-related tyrosine kinase 1	Flt1	-0.310814	5.04485	0.000700233	0.0112531	False
25663	interleukin 1 receptor type 1	Il1r1	0.413339	4.46876	0.000705024	0.0113153	False
24834	thymidine kinase 1	Tk1	0.96045	3.98583	0.000708393	0.0113365	False
29469	lipopolysaccharide binding protein	Lbp	1.55429	1.43302	0.000708858	0.0113365	False
140661	ribosomal protein, large, P1	Rplp1	0.355712	8.76203	0.000709107	0.0113365	False
66015	ADAM metallopeptidase with thrombospondin type 1 motif, 4	Adamts4	1.43706	1.74964	0.000712681	0.0113789	False
314619	strawberry notch homolog 2	Sbno2	0.467106	5.78605	0.000716855	0.0114173	False
64047	lecithin retinol acyltransferase	Lrat	1.85425	0.607523	0.000717827	0.0114173	False
360975	oxoglutarate dehydrogenase	Ogdh	-0.367051	8.15476	0.000717873	0.0114173	False
364678	sideroflexin 1	Sfxn1	0.332586	4.77624	0.00072147	0.0114462	False
100359498	ribosomal protein L35a-like	LOC100359498	0.458969	3.94765	0.000721549	0.0114462	False
287899	ADAM metallopeptidase with thrombospondin type 1 motif, 2	Adamts2	-0.420013	4.18681	0.000725251	0.0114901	False
290647	LSM4 homolog, U6 small nuclear RNA and mRNA degradation associated	Lsm4	0.351262	4.45119	0.000738424	0.0116838	False
311336	nucleolar and spindle associated protein 1	Nusap1	0.51303	3.48041	0.000741241	0.0117133	False
494021	LIM and cysteine-rich domains 1	Lmcd1	0.329709	5.56082	0.000743909	0.0117404	False
64033	cyclin D2	Ccnd2	-0.587654	3.57414	0.000750901	0.0118356	False
362040	oligosaccharyltransferase complex non-catalytic subunit	Ostc	0.318727	6.64726	0.000752371	0.011838	False
688517	methylmalonyl CoA mutase	Mut	-0.338279	6.85337	0.000752981	0.011838	False
25624	vesicle-associated membrane protein 1	Vamp1	-0.325876	4.63522	0.000754155	0.0118414	False
300741	mannose phosphate isomerase (mapped)	Mpi	0.335195	5.28657	0.000759778	0.0119145	False
292305	SFT2 domain containing 1	Sft2d1	0.313004	5.75193	0.000774203	0.0121252	False
360962	transforming, acidic coiled-coil containing protein 3	Tacc3	0.785191	2.90398	0.000776232	0.0121401	False
309375	MARVEL domain containing 1	Marveld1	-0.335361	5.37889	0.000778091	0.0121401	False
299933	DNA replication and sister chromatid cohesion 1	Dscc1	0.889808	1.37434	0.000778114	0.0121401	False
361391	core-binding factor, beta subunit	Cbfb	0.303112	5.93114	0.000779963	0.0121499	False
362859	cytoskeleton-associated protein 4	Ckap4	0.373422	5.54112	0.000780712	0.0121499	False
311676	prostate transmembrane protein, androgen induced 1	Pmepa1	0.34395	5.07117	0.000784422	0.0121922	False
363227	nucleic acid binding protein 1	Nabp1	0.637298	3.08854	0.000786782	0.0122009	False
296315	similar to RIKEN cDNA 1110008F13	RGD1307752	0.287778	5.92425	0.000787319	0.0122009	False
308900	ring finger protein 141	rnf141	-0.393837	4.03739	0.000787957	0.0122009	False
314438	delta(4)-desaturase, sphingolipid 2	Degs2	0.340408	7.22763	0.000789751	0.0122134	False
29283	ribosomal protein L29	Rpl29	0.350459	8.32965	0.000792521	0.0122408	False
29263	activin A receptor type 2A	Acvr2a	-0.339163	5.07787	0.000805289	0.0124224	False
81825	cold inducible RNA binding protein	Cirbp	-0.311165	5.43253	0.000809191	0.012467	False
361526	SERTA domain containing 1	Sertad1	0.38026	4.09981	0.00081713	0.0125736	False
89827	DExD-box helicase 39A	Ddx39a	0.345729	5.37522	0.000819134	0.0125887	False
363254	autophagy related 9A	Atg9a	-0.310395	6.60408	0.000823094	0.0126338	False
291132	glycosylphosphatidylinositol specific phospholipase D1	Gpld1	-0.531921	4.05148	0.000824413	0.0126383	False
65044	core 1 synthase, glycoprotein-N-acetylgalactosamine 3-beta-galactosyltransferase, 1	C1galt1	0.381536	7.39755	0.000828707	0.0126883	False
307403	colony stimulating factor 1 receptor	Csf1r	0.365454	4.76804	0.000831528	0.0127157	False
171114	NDRG family member 2	Ndrg2	-0.318786	6.78338	0.000832972	0.0127219	False
363674	SH3 and cysteine rich domain 2	Stac2	0.920699	1.31557	0.000836053	0.0127532	False
365391	transient receptor potential cation channel, subfamily M, member 5	Trpm5	-0.405285	4.01462	0.000839615	0.0127917	False
363485	polysaccharide biosynthesis domain containing 1	Pbdc1	0.450601	3.61792	0.000848669	0.0129136	False
364050	DDB1 and CUL4 associated factor 8	Dcaf8	-0.287427	5.7321	0.000855825	0.0130064	False
362391	max dimerization protein 1	Mxd1	0.366713	7.32958	0.000858777	0.0130205	False
286976	glucosaminyl (N-acetyl) transferase 3, mucin type	Gcnt3	0.391162	7.45935	0.000858869	0.0130205	False
498392	cytokine like 1	Cytl1	-0.831945	1.91108	0.000863656	0.013077	False
292401	SPARC related modular calcium binding 2	Smoc2	-0.323264	5.46133	0.000872074	0.0131883	False
294520	microtubule associated monooxygenase, calponin and LIM domain containing 1	Mical1	-0.43872	3.88075	0.000875641	0.0132259	False
100361520	ribosomal protein L37a	Rpl37a	0.36469	8.87833	0.000878245	0.0132487	False
24973	RT1 class Ia, locus A1	RT1-A1	0.410893	4.16989	0.000879298	0.0132487	False
64306	ribosomal protein L27	Rpl27	0.354033	8.05451	0.000881263	0.0132568	False
24962	cystathionine gamma-lyase	Cth	-0.423974	3.92812	0.000881992	0.0132568	False
289399	similar to hypothetical protein FLJ10901	RGD1311892	0.298769	5.99978	0.000890433	0.0133599	False
312649	tRNA splicing endonuclease subunit 2	Tsen2	0.47551	3.60952	0.000891023	0.0133599	False
684270	similar to isochorismatase domain containing 2	LOC684270	-0.372015	4.75153	0.000896003	0.0134183	False
117254	peroxiredoxin 1	Prdx1	0.334036	7.99546	0.000900371	0.0134474	False
499891	RGD1565616	RGD1565616	-0.363295	4.11761	0.00090072	0.0134474	False
24190	aldolase, fructose-bisphosphate B	Aldob	-0.478971	8.37164	0.000901228	0.0134474	False
25406	CD44 molecule (Indian blood group)	Cd44	0.499047	4.83237	0.000903635	0.013467	False
316516	transmembrane BAX inhibitor motif containing 1	Tmbim1	0.327345	6.37988	0.000920093	0.0136957	False
295382	netrin G1	Ntng1	-0.607983	3.0806	0.000926314	0.0137716	False
25603	myristoylated alanine rich protein kinase C substrate	Marcks	0.329171	5.06321	0.000937419	0.0139199	False
310764	family with sequence similarity 212, member B	Fam212b	-0.60667	2.98792	0.000939315	0.013924	False
83764	flotillin 2	Flot2	0.415061	5.17098	0.00094055	0.013924	False
307343	family with sequence similarity 210, member A	Fam210a	-0.282745	5.7437	0.000941083	0.013924	False
315330	extra spindle pole bodies like 1, separase	Espl1	-0.414495	4.21382	0.000942842	0.0139332	False
25498	nucleophosmin 1	Npm1	0.342276	7.92885	0.000948943	0.0140066	False
304983	transgelin 2	Tagln2	0.372859	8.99656	0.000951772	0.0140315	False
81679	junction plakoglobin	Jup	0.380551	7.6716	0.000961398	0.0141565	False
680576	tet methylcytosine dioxygenase 3	Tet3	-0.582949	3.39186	0.0009642	0.014168	False
64640	ribosomal protein L30	Rpl30	0.351431	7.89211	0.000964702	0.014168	False
25338	ninjurin 1	Ninj1	0.325318	4.77796	0.000965822	0.014168	False
287436	eukaryotic translation initiation factor 4A1	Eif4a1	0.33346	8.08791	0.000969239	0.014168	False
84355	antioxidant 1 copper chaperone	Atox1	0.326777	5.18642	0.000969534	0.014168	False
24653	phospholipase A2 group IVA	Pla2g4a	0.353312	4.54194	0.000970393	0.014168	False
293455	golgi associated, gamma adaptin ear containing, ARF binding protein 2	Gga2	-0.372231	5.66185	0.000970758	0.014168	False
25599	CD74 molecule	Cd74	0.33387	7.24114	0.000972997	0.014168	False
81670	glutamic--pyruvic transaminase	Gpt	-0.404393	8.13872	0.000973407	0.014168	False
29372	RAS p21 protein activator 3	Rasa3	0.393992	3.90626	0.00097369	0.014168	False
315298	Rac GTPase-activating protein 1	Racgap1	0.668332	2.77782	0.000979343	0.0142334	False
65164	HtrA serine peptidase 1	Htra1	0.34776	5.8308	0.000983589	0.0142783	False
367252	mannosyl (alpha-1,3-)-glycoprotein beta-1,4-N-acetylglucosaminyltransferase, isozyme A	Mgat4a	-0.297128	5.97795	0.000986939	0.01431	False
83807	Y box binding protein 3	Ybx3	0.312986	7.06772	0.000990775	0.0143487	False
500797	mitotic spindle positioning	Misp	0.380886	5.54383	0.00100249	0.0144867	False
116676	aldehyde dehydrogenase 1 family, member A2	Aldh1a2	0.474569	3.57093	0.00100265	0.0144867	False
295365	adhesion molecule with Ig like domain 1	Amigo1	-0.417613	3.93567	0.00100428	0.0144932	False
287408	myosin heavy chain 1	Myh1	-2.13925	4.12813	0.00100698	0.0145151	False
294312	peptidase inhibitor 16	Pi16	-0.657076	3.17209	0.00101491	0.0146123	False
25706	cholecystokinin B receptor	Cckbr	-0.508941	3.6196	0.00102062	0.0146774	False
89819	BUD31 homolog	Bud31	0.295107	5.33778	0.00102687	0.0147501	False
315318	keratin 80	Krt80	0.430015	4.24008	0.00103216	0.0148087	False
29668	proteasome subunit alpha 1	Psma1	0.295414	6.33552	0.00103927	0.0148934	False
287522	SMG6 nonsense mediated mRNA decay factor	Smg6	-0.346187	4.6652	0.00104224	0.0149186	False
25507	proprotein convertase subtilisin/kexin type 6	Pcsk6	0.279905	6.03347	0.00104864	0.0149927	False
79431	basic helix-loop-helix family, member e40	Bhlhe40	0.450654	4.90763	0.00105196	0.0150228	False
362384	receptor accessory protein 1	Reep1	-1.03991	1.96008	0.00106122	0.0151354	False
64298	ribosomal protein L31	Rpl31	0.349389	8.31167	0.00106231	0.0151354	False
81823	calcium and integrin binding 1	Cib1	0.311228	5.72729	0.0010663	0.0151747	False
501854	Rab7b, member RAS oncogene family	Rab7b	0.601509	2.81031	0.00107008	0.015211	False
282821	hyaluronan synthase 1	Has1	1.61836	0.659043	0.00107297	0.0152198	False
81775	ribosomal protein S21	Rps21	0.339508	7.8539	0.00107335	0.0152198	False
304500	acyl-CoA dehydrogenase family, member 10	Acad10	-0.337314	5.00608	0.00107441	0.0152198	False
266713	MNAT1, CDK activating kinase assembly factor	Mnat1	0.411806	3.8178	0.00107808	0.0152542	False
25104	pyruvate carboxylase	Pc	-0.377227	7.41309	0.00109028	0.0154091	False
501621	nuclear RNA export factor 7	Nxf7	-0.628807	2.91978	0.00109316	0.0154322	False
25235	growth hormone receptor	Ghr	-0.297613	5.42408	0.00109622	0.0154575	False
310348	La ribonucleoprotein domain family, member 1B	Larp1b	-0.296197	5.77213	0.00109901	0.0154791	False
304648	anti-silencing function 1B histone chaperone	Asf1b	0.883441	1.1876	0.00110494	0.015545	False
304290	KDEL endoplasmic reticulum protein retention receptor 2	Kdelr2	0.328541	7.03371	0.00110786	0.0155513	False
117182	hydroxysteroid (17-beta) dehydrogenase 3	Hsd17b3	-0.601707	8.35932	0.00110792	0.0155513	False
288272	MIS18 kinetochore protein A	Mis18a	1.00127	0.586271	0.00111455	0.0156265	False
287417	ribosomal protein L26	Rpl26	0.349428	8.02002	0.00112407	0.0157358	False
100137086	jumonji domain containing 7	Jmjd7	-0.435979	3.71713	0.00112567	0.0157358	False
25398	calcium voltage-gated channel subunit alpha1 A	Cacna1a	-0.60797	2.78862	0.00112837	0.0157358	False
81657	gamma-aminobutyric acid type B receptor subunit 1	Gabbr1	-0.346479	4.89233	0.00112932	0.0157358	False
361503	EPS8-like 1	Eps8l1	0.28112	5.79462	0.00112982	0.0157358	False
298512	rhomboid like 2	Rhbdl2	0.665129	2.99673	0.00113001	0.0157358	False
56785	Ral GTPase activating protein catalytic alpha subunit 1	Ralgapa1	-0.320279	4.59073	0.00116234	0.0161498	False
312607	PDZ domain containing RING finger 3	Pdzrn3	-0.46593	5.46074	0.00116316	0.0161498	False
25203	cyclin B1	Ccnb1	0.66408	2.82607	0.00116368	0.0161498	False
25638	phosphodiesterase 4A	Pde4a	-0.532007	3.48348	0.001169	0.0162053	False
171136	Cbl proto-oncogene B	Cblb	-0.347075	5.19143	0.00117256	0.0162213	False
290641	ribosomal protein L18A	Rpl18a	0.351739	9.17359	0.00117313	0.0162213	False
308875	ras homolog family member G	Rhog	0.31909	5.00242	0.0011741	0.0162213	False
29563	cellular retinoic acid binding protein 2	Crabp2	0.58327	3.92034	0.00118118	0.0162865	False
310663	TNF alpha induced protein 8 like 2	Tnfaip8l2	0.869265	1.57008	0.00118147	0.0162865	False
114119	G protein subunit gamma 10	Gng10	0.334377	7.04081	0.00118364	0.0162983	False
100125385	maestro heat-like repeat family member 1	Mroh1	-0.310081	6.32567	0.00118991	0.0163662	False
691193	elongation factor 1 homolog	Elof1	0.307216	4.83825	0.00119408	0.0164053	False
29380	pleckstrin homology-like domain, family A, member 1	Phlda1	0.300711	6.26381	0.00119649	0.01642	False
300218	tubulin, alpha 1C	Tuba1c	0.470453	3.66441	0.0011982	0.0164253	False
171138	potassium voltage-gated channel subfamily E regulatory subunit 2	Kcne2	-0.484729	6.8233	0.00120146	0.0164516	False
29288	ribosomal protein S3a	Rps3a	0.370098	8.95624	0.00120448	0.0164746	False
306015	family with sequence similarity 160, member B2	Fam160b2	-0.31421	5.45578	0.00120648	0.0164837	False
294565	family with sequence similarity 13, member C	Fam13c	-0.867508	1.86966	0.00120794	0.0164853	False
29271	cofilin 1	Cfl1	0.367386	8.11351	0.00121157	0.0165165	False
64183	phosphodiesterase 4D interacting protein	Pde4dip	-0.356779	4.57815	0.00121936	0.0165944	False
305841	olfactory receptor 1637	Olr1637	0.838417	1.99554	0.00121998	0.0165944	False
64193	pituitary tumor-transforming 1	Pttg1	0.743929	2.23775	0.00122671	0.0166675	False
361832	BicC family RNA binding protein 1	Bicc1	0.362271	4.14267	0.00123164	0.0167161	False
100302465	hypothetical LOC100302465	LOC100302465	-0.716848	2.90979	0.00123334	0.0167208	False
245966	transmembrane protein 150A	Tmem150a	-0.331407	5.01567	0.00123758	0.0167597	False
24260	cholinergic receptor, muscarinic 3	Chrm3	-0.336117	4.65183	0.00124055	0.0167815	False
445442	thrombospondin 1	Thbs1	0.495686	6.592	0.00124464	0.0168184	False
171053	pantothenate kinase 4	Pank4	-0.332194	4.42951	0.00125509	0.0169409	False
363266	ArfGAP with FG repeats 1	Agfg1	0.311772	4.93087	0.00126492	0.017055	False
308894	Ras association domain family member 10	Rassf10	-0.491311	3.53657	0.00128241	0.0172543	False
140937	HIG1 hypoxia inducible domain family, member 1A	Higd1a	0.307997	5.6943	0.00128251	0.0172543	False
29611	dihydrolipoamide branched chain transacylase E2	Dbt	-0.349025	7.68617	0.00129537	0.0174083	False
24242	calmodulin 1	Calm1	0.346475	8.63003	0.0013084	0.0175642	False
364648	SHC binding and spindle associated 1	Shcbp1	0.879685	1.34222	0.00130984	0.0175645	False
296259	acyl-CoA synthetase short-chain family member 1	Acss1	-0.347992	7.91808	0.0013138	0.0175927	False
613267	ectonucleoside triphosphate diphosphohydrolase 8	Entpd8	0.34589	4.77392	0.0013148	0.0175927	False
315546	kirre like nephrin family adhesion molecule 3	Kirrel3	-0.780076	1.69913	0.00131757	0.0176052	False
295279	Fc fragment of IgG receptor Ia	Fcgr1a	0.949347	2.03411	0.0013186	0.0176052	False
361801	retinoid X receptor beta	Rxrb	-0.296155	4.96657	0.00132174	0.017628	False
54410	ectonucleotide pyrophosphatase/phosphodiesterase 3	Enpp3	0.890199	5.25502	0.00132932	0.0177099	False
84587	phospholipase C-like 1	Plcl1	-0.630421	3.70397	0.00134669	0.0179218	False
25738	phospholipase C, gamma 1	Plcg1	-0.293468	6.28811	0.00135361	0.0179946	False
114613	solute carrier family 5 member 5	Slc5a5	0.319491	8.39418	0.00135741	0.0180256	False
498638	macrophage scavenger receptor 1	Msr1	1.00775	1.01484	0.00136476	0.0181036	False
295061	transmembrane 4 L six family member 1	Tm4sf1	0.471974	3.84024	0.00137605	0.0182323	False
296655	stomatin	Stom	0.286898	5.362	0.00137767	0.0182323	False
315852	Ttk protein kinase	Ttk	0.843375	2.29101	0.0013789	0.0182323	False
314288	pecanex homolog 1	Pcnx1	-0.275015	5.50909	0.00138258	0.0182614	False
680133	TBC1 domain family, member 8	Tbc1d8	-0.287884	5.66229	0.0013851	0.018275	False
305497	cordon-bleu WH2 repeat protein	Cobl	-0.393075	6.51156	0.00138744	0.0182863	False
117101	potassium voltage-gated channel subfamily C member 3	Kcnc3	-1.08742	0.382256	0.00140398	0.0184845	False
24230	translocator protein	Tspo	0.295943	5.32553	0.00141056	0.0185513	False
89783	lysosomal protein transmembrane 5	Laptm5	0.571625	3.6783	0.00141546	0.0185959	False
297176	mitotic arrest deficient 2 like 1	Mad2l1	0.743075	2.44226	0.00142266	0.0186705	False
29427	allograft inflammatory factor 1	Aif1	0.942286	2.25932	0.0014294	0.0187389	False
83627	polypeptide N-acetylgalactosaminyltransferase 5	Galnt5	0.288963	5.48954	0.00143728	0.0188222	False
83789	ribosomal protein S2	Rps2	0.332133	8.9485	0.00145102	0.0189821	False
681309	thrombospondin 3	Thbs3	-0.661412	3.03543	0.00145635	0.01903	False
497811	xanthine dehydrogenase	Xdh	0.404453	6.89588	0.00145778	0.01903	False
303678	cask-interacting protein 2	Caskin2	-0.304953	5.3956	0.00146178	0.019062	False
117557	tropomyosin 3	Tpm3	0.327841	7.72969	0.00146417	0.019073	False
114636	zyxin	Zyx	0.374673	6.10036	0.00146964	0.0191103	False
290326	PDZ binding kinase	Pbk	0.925256	2.09652	0.00147015	0.0191103	False
305506	eukaryotic translation initiation factor 6	Eif6	0.313774	6.57882	0.00147837	0.019197	False
363060	placenta expressed transcript 1	Plet1	0.641614	3.03587	0.00148414	0.0192516	False
294231	hypothetical protein MGC:15854	RGD1302996	-0.28701	5.4827	0.00148628	0.0192591	False
292710	ETHE1, persulfide dioxygenase	Ethe1	0.364603	6.80968	0.00149366	0.0193343	False
50671	fatty acid synthase	Fasn	0.357476	6.34177	0.00149783	0.0193516	False
29362	TEF, PAR bZIP transcription factor	Tef	-0.320945	5.29341	0.00150011	0.0193516	False
316327	AT-rich interaction domain 5A	Arid5a	0.597474	3.04652	0.00150194	0.0193516	False
498282	Rho GTPase activating protein 30	Arhgap30	0.935717	1.56861	0.00150277	0.0193516	False
361256	supervillin	Svil	-0.333376	6.30807	0.00150286	0.0193516	False
304021	collagen type VIII alpha 1 chain	Col8a1	0.688851	2.3329	0.00150703	0.0193852	False
360627	FK506 binding protein 10	Fkbp10	0.407365	3.95624	0.00150922	0.019393	False
79218	G protein subunit gamma 5	Gng5	0.28505	5.37959	0.00151274	0.019418	False
296709	ribosomal protein L35	Rpl35	0.376687	8.84712	0.00151717	0.0194546	False
303380	schlafen 2	Slfn2	0.438852	5.7367	0.0015207	0.0194796	False
304378	GRB10 interacting GYF protein 1	Gigyf1	-0.318715	4.96556	0.00153025	0.0195733	False
24516	Jun proto-oncogene, AP-1 transcription factor subunit	Jun	0.30947	6.64769	0.0015312	0.0195733	False
687192	GID complex subunit 4	Gid4	-0.280987	5.84622	0.00153996	0.0196648	False
681031	small nuclear ribonucleoprotein polypeptide G	Snrpg	0.466696	3.55521	0.00156915	0.0200042	False
29540	hydroxysteroid (17-beta) dehydrogenase 7	Hsd17b7	0.388187	3.78619	0.00156978	0.0200042	False
298850	centromere protein A	Cenpa	0.880306	1.15931	0.00157666	0.020071	False
683980	keratinocyte associated protein 3	Krtcap3	0.326291	5.23366	0.00158691	0.0201807	False
691141	hypothetical protein LOC691141	LOC691141	1.30182	0.392963	0.00158959	0.0201939	False
362810	coenzyme Q10A	Coq10a	-0.497112	3.30809	0.00159352	0.020223	False
307480	SEL1 domain containing protein RGD735029	RGD735029	-0.333257	5.61273	0.00159983	0.0202821	False
58945	dynein light chain LC8-type 1	Dynll1	0.311232	7.47523	0.00160551	0.0203331	False
66028	ADP-ribosylation factor like GTPase 6 interacting protein 5	Arl6ip5	0.284223	5.90775	0.0016199	0.0204943	False
363000	pre-mRNA processing factor 40 homolog B	Prpf40b	-0.36863	4.13805	0.00162389	0.0205122	False
117033	matrix metallopeptidase 12	Mmp12	1.11511	0.92335	0.00162465	0.0205122	False
312849	mediator complex subunit 21	Med21	0.420167	3.58604	0.001636	0.0206176	False
290644	IFI30, lysosomal thiol reductase	Ifi30	0.331629	5.42042	0.00163634	0.0206176	False
246208	interferon gamma inducible protein 47	Ifi47	0.474957	3.73774	0.0016401	0.0206347	False
58936	polo-like kinase 3	Plk3	0.669364	2.62649	0.0016433	0.0206347	False
81778	S100 calcium binding protein A10	S100a10	0.763501	5.1102	0.00164454	0.0206347	False
25584	coagulation factor III, tissue factor	F3	0.382227	4.97633	0.00164665	0.0206347	False
306630	abhydrolase domain containing 13	Abhd13	-0.290427	5.82913	0.00164878	0.0206347	False
301701	NDC80 kinetochore complex component	Ndc80	0.664285	2.29968	0.00164987	0.0206347	False
24251	Cd53 molecule	Cd53	0.72728	2.84098	0.00165148	0.0206347	False
315649	salt-inducible kinase 2	Sik2	-0.304205	5.10485	0.00165158	0.0206347	False
83781	galectin 3	Lgals3	0.492682	6.78015	0.00165278	0.0206347	False
29285	ribosomal protein S15	Rps15	0.329939	8.26219	0.00166751	0.0207974	False
315675	gliomedin	Gldn	-0.523354	3.49743	0.0016862	0.020993	False
288778	proliferation-associated 2G4	Pa2g4	0.274141	6.29046	0.00168661	0.020993	False
353250	niacin receptor 1	Niacr1	1.0572	1.04022	0.00169172	0.0210258	False
308100	acetyl-CoA acetyltransferase 2	Acat2	0.324943	4.3392	0.00169266	0.0210258	False
116493	GRIP1 associated protein 1	Gripap1	-0.294324	5.17558	0.00169683	0.0210564	False
314655	ADAM metallopeptidase with thrombospondin type 1 motif, 10	Adamts10	-0.296779	5.54357	0.0016996	0.0210695	False
81773	ribosomal protein S10	Rps10	0.321134	7.29105	0.0017053	0.0211189	False
305544	aftiphilin	Aftph	-0.332292	6.80377	0.00171393	0.0211684	False
313057	serine incorporator 2	Serinc2	0.339617	7.16397	0.00171599	0.0211684	False
361773	coiled-coil domain containing 186	Ccdc186	-0.297238	4.84747	0.00171831	0.0211684	False
306575	cytoskeleton associated protein 2	Ckap2	0.685689	2.54726	0.00171893	0.0211684	False
394266	gap junction protein, beta 2	Gjb2	2.20729	2.70819	0.00171919	0.0211684	False
309678	trafficking protein particle complex 10	Trappc10	-0.326199	6.70333	0.00172026	0.0211684	False
56781	myosin, light chain 1	Myl1	-1.29691	0.777487	0.00172133	0.0211684	False
83523	inositol monophosphatase 1	Impa1	0.304124	5.40479	0.00172335	0.021172	False
25620	cAMP responsive element modulator	Crem	0.374203	4.1804	0.00173253	0.0212636	False
25084	interleukin 4 receptor	Il4r	0.429207	5.08909	0.00173625	0.021288	False
296302	eukaryotic translation initiation factor 2 subunit beta	Eif2s2	0.310823	6.79931	0.00173822	0.021291	False
316256	TNF receptor superfamily member 21	Tnfrsf21	0.276838	6.17908	0.00175017	0.0214161	False
117242	teneurin transmembrane protein 2	Tenm2	-0.909556	1.49496	0.00175655	0.0214728	False
170546	ryanodine receptor 3	Ryr3	-0.799805	2.16995	0.00175966	0.0214895	False
287470	stromal cell derived factor 2	Sdf2	0.277296	5.73178	0.00177471	0.0216508	False
192227	prostaglandin reductase 1	Ptgr1	0.297234	6.35534	0.00177639	0.0216508	False
312488	ATPase H+ transporting V1 subunit B1	Atp6v1b1	-1.20412	0.117421	0.00180014	0.0219186	False
361272	dehydrogenase E1 and transketolase domain containing 1	Dhtkd1	-0.485995	3.46487	0.00180685	0.0219786	False
315741	progestin and adipoQ receptor family member 5	Paqr5	-0.470235	5.64913	0.00182282	0.022151	False
291133	aldehyde dehydrogenase 5 family, member A1	Aldh5a1	-0.391217	4.16077	0.00182728	0.0221833	False
246115	phospholipid phosphatase 2	Plpp2	0.313182	5.86125	0.00183113	0.0222081	False
63865	legumain	Lgmn	0.339697	6.72353	0.0018337	0.0222173	False
315795	cingulin-like 1	Cgnl1	-0.300859	6.8673	0.00184488	0.0223308	False
501097	MyoD family inhibitor	Mdfi	0.937758	0.876933	0.00185501	0.0224314	False
316376	inositol polyphosphate-1-phosphatase	Inpp1	-0.312685	4.98184	0.00186142	0.0224868	False
309131	solute carrier family 22, member 18	Slc22a18	0.279427	5.3187	0.00187884	0.0226637	False
65178	synaptosome associated protein 91	Snap91	-0.83934	1.57825	0.00187974	0.0226637	False
362645	ATPase 13A2	Atp13a2	-0.331999	4.46936	0.00189035	0.0227561	False
289707	Ly1 antibody reactive	Lyar	0.394294	3.99445	0.00189111	0.0227561	False
298936	syntrophin, gamma 2	Sntg2	-0.646533	2.83972	0.00189373	0.0227654	False
155151	coronin 1A	Coro1a	0.867156	3.01022	0.00189874	0.0228034	False
304503	HECT domain E3 ubiquitin protein ligase 4	Hectd4	-0.342891	4.50531	0.00190198	0.0228201	False
293938	biogenesis of lysosomal organelles complex-1, subunit 2	Bloc1s2	0.383829	4.25769	0.00191372	0.0229385	False
25045	diazepam binding inhibitor, acyl-CoA binding protein	Dbi	0.353509	6.47739	0.00191858	0.0229547	False
24518	JunD proto-oncogene, AP-1 transcription factor subunit	Jund	0.348684	6.50562	0.0019188	0.0229547	False
29675	proteasome subunit beta 2	Psmb2	0.280633	6.46753	0.00192313	0.0229842	False
362257	Ral GTPase activating protein non-catalytic beta subunit	Ralgapb	-0.291384	6.65804	0.00193153	0.0230386	False
291137	geminin, DNA replication inhibitor	Gmnn	0.447612	3.53731	0.0019329	0.0230386	False
29474	coronin 1B	Coro1b	0.299496	7.31729	0.00193329	0.0230386	False
361037	mitochondrial ribosomal protein L52	Mrpl52	0.271922	5.95897	0.00194334	0.0231359	False
29257	ribosomal protein L9	Rpl9	0.317762	8.43114	0.00194587	0.0231437	False
288925	WD repeat domain 83 opposite strand	Wdr83os	0.281523	5.64119	0.00195012	0.0231503	False
309871	PR/SET domain 1	Prdm1	0.501473	3.26647	0.00195019	0.0231503	False
690751	WD repeat domain 59	Wdr59	-0.353865	4.2029	0.0019626	0.0232752	False
24508	interferon regulatory factor 1	Irf1	0.369479	4.93499	0.00196483	0.0232792	False
64566	Wnt family member 5A	Wnt5a	0.339416	4.68994	0.00197907	0.0234254	False
24484	insulin-like growth factor binding protein 3	Igfbp3	0.369505	7.48794	0.00198184	0.0234356	False
360616	protein phosphatase 1, regulatory (inhibitor) subunit 1B	Ppp1r1b	-0.352575	7.46618	0.00198405	0.0234392	False
362453	cAMP responsive element binding protein-like 2	Crebl2	-0.575482	2.86636	0.00199622	0.0235603	False
25164	cyclin-dependent kinase inhibitor 2B	Cdkn2b	-0.30442	6.48716	0.00202557	0.0238838	False
297902	GTP binding protein overexpressed in skeletal muscle	Gem	0.29324	5.12402	0.00202771	0.0238862	False
502306	immunoglobulin superfamily, member 23	Igsf23	-0.714794	1.85154	0.00204006	0.0240088	False
294762	poly (ADP-ribose) polymerase family, member 8	Parp8	-0.379835	3.85315	0.00205007	0.0241035	False
680531	suppressor APC domain containing 2	Sapcd2	0.880603	1.12888	0.00206186	0.024219	False
296566	chloride intracellular channel 3	Clic3	0.2808	5.98082	0.00206961	0.0242868	False
291983	proteasome subunit beta 10	Psmb10	0.51717	3.33385	0.00207519	0.0243291	False
313479	origin recognition complex, subunit 1	Orc1	1.09937	0.597695	0.00207913	0.0243522	False
366300	protein-L-isoaspartate (D-aspartate) O-methyltransferase domain containing 1	Pcmtd1	-0.304802	6.47595	0.00209265	0.0244872	False
288031	family with sequence similarity 43, member A	Fam43a	0.454699	3.93171	0.00209541	0.0244962	False
116684	5-oxoprolinase (ATP-hydrolysing)	Oplah	-0.282285	5.43581	0.00210062	0.024513	False
84490	flap structure-specific endonuclease 1	Fen1	0.591091	2.75789	0.00210083	0.024513	False
360762	RNA polymerase I subunit D	Polr1d	0.262627	5.89524	0.00210284	0.0245132	False
314196	L-2-hydroxyglutarate dehydrogenase	L2hgdh	-0.340756	4.1694	0.00211661	0.0246298	False
303019	neuralized E3 ubiquitin protein ligase 1B	Neurl1b	-0.592317	3.1758	0.00211684	0.0246298	False
84389	cyclin H	Ccnh	0.318	4.32275	0.00212068	0.0246511	False
100216475	hexosaminidase D	Hexdc	-0.311982	4.64873	0.002125	0.0246781	False
313717	calsyntenin 1	Clstn1	-0.314938	6.82117	0.00213238	0.0247405	False
287813	immunoglobulin superfamily, member 7	Igsf7	1.49667	1.81363	0.00213538	0.0247519	False
302808	zinc finger, DHHC-type containing 9	Zdhhc9	-0.355107	7.86273	0.00215198	0.0249208	False
498909	coenzyme Q9	Coq9	-0.284109	6.43386	0.00216162	0.025009	False
291760	desmocollin 2	Dsc2	0.291147	6.51442	0.00216651	0.0250202	False
311570	myosin heavy chain 7B	Myh7b	-0.713087	2.03834	0.00216667	0.0250202	False
114764	microtubule-associated protein, RP/EB family, member 1	Mapre1	0.261183	5.89705	0.00216868	0.0250202	False
362648	Rho guanine nucleotide exchange factor 19	Arhgef19	-0.396292	4.00393	0.00217102	0.0250236	False
293418	ribosomal protein L27a	Rpl27a	0.323066	8.80355	0.00218725	0.0251871	False
310960	ubiquitin specific peptidase 33	Usp33	-0.271507	5.99406	0.00219408	0.0252422	False
84028	pancreatic lipase-related protein 1	Pnliprp1	-0.570487	3.6083	0.00220385	0.0253309	False
314441	solute carrier family 25 member 29	Slc25a29	-0.562387	2.91508	0.00220743	0.0253483	False
301384	3-hydroxyisobutyryl-CoA hydrolase	Hibch	-0.315374	6.28337	0.00221258	0.0253838	False
310801	solute carrier family 30 member 7	Slc30a7	0.445794	3.70061	0.0022164	0.025404	False
297755	ribosomal protein L7	Rpl7	0.3451	9.36612	0.00222537	0.0254786	False
287884	secreted and transmembrane 1B	Sectm1b	0.4374	4.29865	0.00222776	0.0254786	False
140666	regulator of calcineurin 2	Rcan2	-0.644549	3.40715	0.00222912	0.0254786	False
100362102	LSM family member 14B	Lsm14b	-0.315232	4.43437	0.00224048	0.025571	False
246042	nucleolar protein interacting with the FHA domain of MKI67	Nifk	0.298123	4.64758	0.00224136	0.025571	False
307805	centromere protein T	Cenpt	0.865534	1.41967	0.00224396	0.025577	False
683626	limb bud and heart development	Lbh	0.562563	3.60178	0.00226519	0.0257951	False
312132	transmembrane protein 106B	Tmem106b	-0.282044	5.64204	0.00227113	0.0258388	False
500545	cell division cycle associated 8	Cdca8	0.705006	2.35847	0.00228069	0.0259237	False
304474	phosphatidylinositol transfer protein, membrane-associated 2	Pitpnm2	-0.281236	5.68046	0.00228556	0.0259551	False
362894	R3H domain containing 2	R3hdm2	-0.280976	6.34953	0.00230123	0.0260771	False
289144	calcyclin binding protein	Cacybp	0.341994	6.92429	0.00230259	0.0260771	False
499506	ankyrin repeat domain 34B	Ankrd34b	-0.933646	1.28215	0.0023046	0.0260771	False
114523	netrin 1	Ntn1	-0.546673	3.14901	0.00230478	0.0260771	False
681382	hypothetical protein LOC681382	LOC681382	0.826337	1.15913	0.00231836	0.0262066	False
100360334	formin homology 2 domain containing 3	Fhod3	-0.559768	2.76767	0.00232678	0.0262776	False
313825	vacuolar protein sorting 13 homolog D	Vps13d	-0.257274	5.9188	0.00233236	0.0263165	False
498703	family with sequence similarity 193, member B	Fam193b	-0.281588	5.62693	0.00233716	0.0263465	False
360572	ribosomal protein L23a	Rpl23a	0.370437	8.39307	0.00234243	0.0263819	False
301458	NADH:ubiquinone oxidoreductase core subunit S1	Ndufs1	-0.303698	7.55879	0.00234802	0.0264206	False
29739	glutamate cysteine ligase, modifier subunit	Gclm	0.276962	5.83712	0.0023529	0.0264513	False
291921	Nedd4 binding protein 1	N4bp1	0.281103	5.50131	0.00236545	0.0265681	False
360838	Ly6/Plaur domain containing 1	Lypd1	1.3846	0.179748	0.00238502	0.0267636	False
288077	hematopoietic cell specific Lyn substrate 1	Hcls1	0.922054	2.15892	0.00240052	0.0269129	False
65136	ribosomal protein S8	Rps8	0.327782	8.96906	0.00240809	0.0269633	False
81824	actin related protein 2/3 complex, subunit 1A	Arpc1a	0.282141	6.73634	0.00241265	0.0269633	False
29425	proteasome subunit beta 5	Psmb5	0.272711	5.29696	0.00241335	0.0269633	False
306748	C-X-C motif chemokine ligand 14	Cxcl14	0.279482	5.87056	0.00241377	0.0269633	False
367562	glucosidase, alpha, acid	Gaa	-0.285505	5.1908	0.00242297	0.0270414	False
681665	integrator complex subunit 6 like	Ints6l	-0.399599	3.91706	0.00247101	0.0275526	False
171088	inositol polyphosphate-5-phosphatase J	Inpp5j	0.283061	4.84126	0.00249116	0.0277522	False
297900	penta-EF hand domain containing 1	Pef1	0.26991	5.151	0.00249431	0.0277622	False
303575	kinesin family member 18B	Kif18b	0.731943	1.71772	0.00249891	0.0277883	False
64473	3'(2'), 5'-bisphosphate nucleotidase 1	Bpnt1	0.286871	6.90632	0.00250196	0.027797	False
362958	MICAL-like 1	Micall1	-0.320728	4.90403	0.00250639	0.0278211	False
296060	Rho GTPase activating protein 11A	Arhgap11a	0.421761	3.92443	0.00252214	0.0279707	False
303412	ring finger protein 43	Rnf43	-0.436248	3.59119	0.00253681	0.0280964	False
261730	aurora kinase A	Aurka	0.718559	2.32903	0.00253804	0.0280964	False
684934	coiled-coil domain containing 9	Ccdc9	-0.270624	5.77853	0.00254058	0.0280993	False
360697	interferon gamma receptor 2	Ifngr2	0.312688	4.85255	0.0025713	0.0283912	False
305104	collagen type IX alpha 1 chain	Col9a1	-0.780376	1.42944	0.00257158	0.0283912	False
64515	cell division cycle 20	Cdc20	0.601012	2.95054	0.00257646	0.0284048	False
25475	lectin, galactose binding, soluble 5	Lgals5	0.990492	0.733166	0.00257743	0.0284048	False
24851	tropomyosin 1	Tpm1	-0.38408	10.2911	0.00259102	0.028495	False
280671	thioredoxin domain containing 9	Txndc9	0.271532	5.45127	0.00259131	0.028495	False
304138	cysteine and tyrosine rich 1	Cyyr1	-0.358867	4.40084	0.00259256	0.028495	False
54292	regulator of G-protein signaling 12	Rgs12	-0.41979	4.30252	0.00259666	0.0285146	False
680080	translocase of outer mitochondrial membrane 5	Tomm5	0.50608	3.03775	0.00260628	0.0285947	False
192252	dCTP pyrophosphatase 1	Dctpp1	0.65583	2.48141	0.00260985	0.0286084	False
84580	histone deacetylase 5	Hdac5	-0.265861	6.04872	0.00261774	0.0286628	False
310645	phosphomevalonate kinase	Pmvk	0.393653	4.06229	0.00261947	0.0286628	False
314855	carboxypeptidase M	Cpm	-0.300542	7.23886	0.00262455	0.0286929	False
316620	melanophilin	Mlph	0.307804	7.08447	0.00263019	0.0287291	False
287989	Eph receptor B3	Ephb3	-0.316876	5.87772	0.00263626	0.0287698	False
24644	phosphoglycerate kinase 1	Pgk1	0.304017	7.87333	0.00264423	0.028808	False
100360880	FosB proto-oncogene, AP-1 transcription factor subunit	Fosb	1.22184	2.76846	0.00264444	0.028808	False
290344	ADAM metallopeptidase domain 28	Adam28	0.313475	6.74221	0.00264727	0.0288133	False
306665	interactor of little elongation complex ELL subunit 1	Ice1	-0.300173	4.68433	0.00266545	0.0289464	False
24407	glutamate ionotropic receptor kainate type subunit 5	Grik5	-0.397164	3.60827	0.00267227	0.0289464	False
116478	kinase D-interacting substrate 220	Kidins220	-0.279802	6.50904	0.00267264	0.0289464	False
304759	RAB3 GTPase activating protein catalytic subunit 1	Rab3gap1	-0.2949	4.86284	0.00267284	0.0289464	False
307858	lactate dehydrogenase D	Ldhd	0.327959	5.90618	0.00267581	0.0289464	False
316290	opioid growth factor receptor-like 1	Ogfrl1	0.599095	2.83188	0.00267595	0.0289464	False
303812	von Willebrand factor A domain containing 5B2	Vwa5b2	-0.561377	2.82209	0.00267656	0.0289464	False
361689	unc-93 homolog B1, TLR signaling regulator	Unc93b1	0.469369	3.65904	0.00267831	0.0289464	False
116565	LDL receptor related protein associated protein 1	Lrpap1	-0.284807	6.09991	0.00269587	0.0291107	False
312159	family with sequence similarity 3, member C	Fam3c	0.312467	6.10304	0.00270416	0.0291746	False
316519	solute carrier family 11 member 1	Slc11a1	0.979119	1.58748	0.00271172	0.0292133	False
361735	membrane spanning 4-domains A6A	Ms4a6a	0.839861	2.34165	0.0027125	0.0292133	False
287715	WNK lysine deficient protein kinase 4	Wnk4	-0.400496	3.63737	0.0027324	0.029402	False
366126	Spi-1 proto-oncogene	Spi1	0.944496	1.77378	0.00273921	0.0294253	False
24314	NAD(P)H quinone dehydrogenase 1	Nqo1	0.316889	7.32731	0.00273935	0.0294253	False
245918	cell growth regulator with EF hand domain 1	Cgref1	0.378837	5.3293	0.00274614	0.0294725	False
286996	zinc finger protein 689	Zfp689	-0.34498	4.58337	0.00276745	0.0296729	False
317599	ATPase phospholipid transporting 11C	Atp11c	-0.369607	3.91504	0.00276963	0.0296729	False
680754	odorant binding protein 2A	Obp2a	-1.25228	1.791	0.00279332	0.0299007	False
295243	keratinocyte associated protein 2	Krtcap2	0.269664	6.12479	0.00279674	0.0299113	False
300521	transforming growth factor beta regulator 1	Tbrg1	0.259306	5.80896	0.00280361	0.0299587	False
361054	emopamil binding protein-like	Ebpl	0.476064	3.34053	0.00280752	0.0299745	False
293042	semaphorin 4B	Sema4b	0.315712	4.81783	0.00283367	0.0302275	False
690489	cystin 1	Cys1	-0.830335	2.03989	0.00283858	0.0302459	False
81776	ribosomal protein S24	Rps24	0.336785	8.76685	0.00284032	0.0302459	False
84495	X-ray repair cross complementing 1	Xrcc1	-0.276724	5.4754	0.00284908	0.0302727	False
315707	C-terminal Src kinase	Csk	0.282382	5.33966	0.00284995	0.0302727	False
613226	solute carrier family 6 member 17	Slc6a17	-0.751653	2.15322	0.00285043	0.0302727	False
117017	RNA polymerase II subunit G	Polr2g	0.319211	4.53805	0.00285266	0.0302727	False
78965	colony stimulating factor 1	Csf1	0.467955	3.24956	0.00286219	0.0303476	False
684148	LSM2 homolog, U6 small nuclear RNA and mRNA degradation associated	Lsm2	0.413042	3.63654	0.00286934	0.0303972	False
689883	SET domain, bifurcated 1	Setdb1	-0.264832	5.27226	0.00287529	0.0304341	False
290638	UDP-GlcNAc:betaGal beta-1,3-N-acetylglucosaminyltransferase 3	B3gnt3	0.394059	5.05569	0.00288556	0.0305165	False
298541	dehydrodolichyl diphosphate synthase subunit	Dhdds	-0.321356	7.04493	0.00288941	0.030531	False
296470	pancreatic progenitor cell differentiation and proliferation factor	Ppdpf	0.270964	5.40247	0.00290422	0.0306611	False
29687	complement C1q B chain	C1qb	0.322222	4.55564	0.00292249	0.0308276	False
361308	kinesin family member 20A	Kif20a	0.610872	2.82176	0.00293239	0.0308962	False
59293	regulator of G-protein signaling 19	Rgs19	0.670916	2.07573	0.00293401	0.0308962	False
24377	glucose-6-phosphate dehydrogenase	G6pd	0.284286	6.77246	0.00293921	0.0309245	False
66021	cytochrome b-245 beta chain	Cybb	0.441502	4.08219	0.00295517	0.0310659	False
681219	COX14, cytochrome c oxidase assembly factor	Cox14	0.270116	5.0488	0.0029871	0.031362	False
117056	H3 histone, family 3B	H3f3b	0.306348	8.64821	0.00298844	0.031362	False
259218	RWD domain containing 1	Rwdd1	0.292887	4.78131	0.0029938	0.0313915	False
619577	ring finger protein 14	Rnf14	-0.29188	6.79327	0.00300296	0.0314608	False
300985	poly (ADP-ribose) polymerase family, member 3	Parp3	0.352329	4.03447	0.00301311	0.0315403	False
298441	nuclear autoantigenic sperm protein	Nasp	0.296681	4.75159	0.00304763	0.0318746	False
308405	DM1 protein kinase	Dmpk	-0.547182	6.30199	0.00306767	0.0320495	False
314228	small nuclear RNA activating complex, polypeptide 1	Snapc1	0.566957	2.69179	0.00306957	0.0320495	False
29636	coagulation factor II (thrombin) receptor-like 2	F2rl2	0.924903	0.720181	0.00307457	0.0320745	False
83477	B-cell CLL/lymphoma 10	Bcl10	0.28439	4.89482	0.0030882	0.0321895	False
298006	C-C motif chemokine ligand 21	Ccl21	0.505868	4.41624	0.00310719	0.03236	False
29265	mast cell protease 1	Mcpt1	1.33912	2.11916	0.00311451	0.0324088	False
314436	ELK1, ETS transcription factor	Elk1	-0.326737	4.27414	0.00313538	0.0325982	False
312490	poly(A) binding protein interacting protein 2B	Paip2b	-0.498698	3.30157	0.00313801	0.0325982	False
25578	tyrosine 3-monooxygenase/tryptophan 5-monooxygenase activation protein, zeta	Ywhaz	0.305192	8.89602	0.00315024	0.0326977	False
360668	SEC14-like lipid binding 1	Sec14l1	-0.283862	5.77177	0.00315635	0.0327335	False
310362	similar to expressed sequence AW549877	RGD1305938	-0.298169	4.98566	0.00316495	0.0327951	False
140655	ribosomal protein S16	Rps16	0.302116	8.75696	0.0031822	0.0329461	False
303068	ADAM metallopeptidase domain 19	Adam19	0.284357	5.12898	0.00318904	0.0329892	False
303659	kinesin family member 19	Kif19	-0.806226	1.23102	0.00320566	0.0331332	False
684771	cell division cycle associated 5	Cdca5	1.16067	-0.127962	0.00320849	0.0331347	False
311168	solute carrier family 43 member 1	Slc43a1	-0.259384	5.61746	0.00322778	0.0333037	False
29317	cysteine and glycine-rich protein 2	Csrp2	0.281957	7.24478	0.00323027	0.0333037	False
500973	solute carrier family 37 member 2	Slc37a2	0.827144	1.26055	0.00323527	0.0333273	False
58842	prolactin regulatory element binding	Preb	0.324353	6.02862	0.00328839	0.0338462	False
24701	glycogen phosphorylase, muscle associated	Pygm	-0.516216	3.28427	0.00329192	0.0338543	False
305055	potassium channel tetramerization domain containing 3	Kctd3	-0.2566	5.61989	0.00330436	0.0339184	False
293700	tRNA methyltransferase subunit 11-2	Trmt112	0.295221	4.82259	0.00330625	0.0339184	False
300838	tropomodulin 3	Tmod3	0.28009	6.52638	0.00330643	0.0339184	False
25145	CD24 molecule	Cd24	0.297771	9.11972	0.00332892	0.0341207	False
406162	notch 4	Notch4	-0.35174	3.87555	0.00334364	0.0342155	False
363237	WD repeat domain 12	Wdr12	0.32445	4.2785	0.00334372	0.0342155	False
298374	pre-mRNA processing factor 38A	Prpf38a	0.30565	4.4113	0.00335508	0.0343032	False
304061	bromodomain and WD repeat domain containing 1	Brwd1	-0.283828	4.89523	0.00336197	0.0343451	False
362029	amylo-alpha-1, 6-glucosidase, 4-alpha-glucanotransferase	Agl	-0.279446	5.3156	0.00336863	0.0343846	False
363634	potassium channel tetramerization domain containing 11	Kctd11	0.57955	2.88835	0.00337185	0.0343889	False
313436	zinc finger CCHC-type containing 12	Zcchc12	-0.449803	3.29506	0.00337503	0.0343929	False
28298	ribosomal protein L32	Rpl32	0.32739	7.23988	0.00338706	0.0344869	False
298675	retention in endoplasmic reticulum sorting receptor 1	Rer1	0.269314	6.69259	0.00339661	0.0345556	False
114856	dual specificity phosphatase 1	Dusp1	0.346547	5.31837	0.00340713	0.034634	False
100364165	natural killer cell triggering receptor	Nktr	-0.292448	5.02412	0.0034235	0.0347717	False
24248	catalase	Cat	-0.313291	6.08611	0.00342649	0.0347734	False
498100	Mab-21 domain containing 2	Mb21d2	0.285892	4.6426	0.00345378	0.0349976	False
290823	ER lipid raft associated 2	Erlin2	-0.251287	5.94437	0.00345427	0.0349976	False
29676	proteasome subunit beta 3	Psmb3	0.251334	5.80413	0.00346066	0.0350334	False
296913	LSM8 homolog, U6 small nuclear RNA associated	Lsm8	0.291506	4.82669	0.00347844	0.0351845	False
29557	myosin heavy chain 7	Myh7	-1.48052	0.367246	0.00349255	0.0352983	False
259221	oxysterol binding protein-like 1A	Osbpl1a	-0.300656	6.41779	0.00352302	0.035577	False
445541	replication initiator 1	Repin1	-0.437206	3.48652	0.003538	0.035699	False
299104	FK506 binding protein 3	Fkbp3	0.279584	5.01247	0.00355649	0.0358562	False
79248	ATP binding cassette subfamily A member 2	Abca2	-0.257222	5.84579	0.00357682	0.0360316	False
362228	N(alpha)-acetyltransferase 20, NatB catalytic subunit	Naa20	0.30012	4.96044	0.00360121	0.0362336	False
294560	mitochondrial calcium uniporter	Mcu	0.291773	5.22617	0.00360276	0.0362336	False
114203	SH2B adaptor protein 2	Sh2b2	0.897561	0.974707	0.00361937	0.036371	False
280670	leucine zipper tumor suppressor family member 3	Lzts3	-0.44207	3.33726	0.00365059	0.0366547	False
65210	cytochrome P450, family 2, subfamily j, polypeptide 4	Cyp2j4	0.298109	6.72778	0.00366247	0.0367441	False
64045	glutaredoxin	Glrx	0.380106	7.29019	0.00367967	0.0368865	False
316201	dishevelled associated activator of morphogenesis 2	Daam2	-0.778952	2.11509	0.00368355	0.036894	False
362924	ST3 beta-galactoside alpha-2,3-sialyltransferase 1	St3gal1	0.320714	4.94277	0.0036864	0.036894	False
498533	family with sequence similarity 167, member A	Fam167a	0.641457	2.02787	0.00369559	0.0369559	False
304477	kinetochore associated 1	Kntc1	0.664538	2.80045	0.0037392	0.0373485	False
83613	neurofilament light	Nefl	-0.722514	2.46557	0.00374092	0.0373485	False
289809	partner of NOB1 homolog	Pno1	0.376203	4.00703	0.0037515	0.0373929	False
304816	leiomodin 1	Lmod1	-0.498549	6.17466	0.00375408	0.0373929	False
361618	stromal interaction molecule 1	Stim1	-0.250442	5.74313	0.00375448	0.0373929	False
360711	cell proliferation regulating inhibitor of protein phosphatase 2A	Cip2a	0.942215	0.668704	0.00376909	0.0375081	False
83688	transaldolase 1	Taldo1	0.273507	6.90184	0.00377245	0.0375112	False
64303	profilin 1	Pfn1	0.362527	8.09493	0.00378571	0.0375939	False
293694	mitogen activated protein kinase kinase kinase kinase 2	Map4k2	-0.349279	3.96721	0.00378688	0.0375939	False
64195	C-type lectin domain containing 10A	Clec10a	0.640223	3.4912	0.00380824	0.0377549	False
25461	histamine receptor H 2	Hrh2	-0.711878	1.82433	0.00380923	0.0377549	False
299783	GLI pathogenesis-related 1	Glipr1	0.675628	2.10305	0.00381906	0.0378219	False
494345	programmed cell death 10	Pdcd10	0.276791	5.98923	0.0038338	0.0379373	False
297518	actin related protein 2/3 complex, subunit 4	Arpc4	0.312394	6.4486	0.00384501	0.0380177	False
499126	IGF-like family receptor 1	Igflr1	-1.00885	0.23565	0.00387373	0.0382709	False
25186	ephrin B1	Efnb1	0.301632	4.32245	0.00387926	0.0382949	False
361364	docking protein 4	Dok4	0.497277	3.31254	0.00388469	0.0383177	False
363158	cartilage associated protein	Crtap	0.378595	3.6278	0.00389603	0.0383988	False
84493	flavin containing monooxygenase 3	Fmo3	-0.406305	4.49521	0.00392304	0.0386341	False
362519	structural maintenance of chromosomes 2	Smc2	0.347423	4.13793	0.00392895	0.0386613	False
60421	protein arginine methyltransferase 1	Prmt1	0.341221	4.3416	0.0039345	0.038685	False
83462	dynein light chain Tctex-type 1	Dynlt1	0.322071	4.6252	0.00394528	0.0387601	False
58920	glypican 1	Gpc1	-0.382768	3.95098	0.0039536	0.0388108	False
687008	propionyl-CoA carboxylase alpha subunit	Pcca	-0.260156	6.00764	0.00396984	0.0389392	False
304581	transmembrane protein 119	Tmem119	0.603094	2.38474	0.00397537	0.0389624	False
78967	melanoma cell adhesion molecule	Mcam	-0.299361	6.35914	0.00399884	0.0391613	False
29222	prothymosin alpha	Ptma	0.287337	8.59146	0.00400324	0.0391732	False
50645	RAB27A, member RAS oncogene family	Rab27a	0.323748	7.14717	0.00401055	0.0391997	False
65137	RuvB-like AAA ATPase 1	Ruvbl1	0.384174	3.79578	0.00401396	0.0391997	False
500988	DEAD-box helicase 6	Ddx6	-0.284816	4.68359	0.0040155	0.0391997	False
259225	protein phosphatase 1, regulatory (inhibitor) subunit 14B	Ppp1r14b	0.29757	5.28793	0.00405166	0.0395214	False
315953	claudin 18	Cldn18	0.305354	9.91687	0.00405549	0.0395274	False
100362836	POC1 centriolar protein B	Poc1b	0.288525	4.93325	0.00407042	0.0396371	False
171553	alpha 1,3-galactosyltransferase 2	A3galt2	0.623123	3.85517	0.00407319	0.0396371	False
362691	transmembrane protein 178A	Tmem178a	0.940292	0.980338	0.00408342	0.0396975	False
85251	collagen type XVIII alpha 1 chain	Col18a1	-0.30601	6.88303	0.00408585	0.0396975	False
360847	ubiquitin-conjugating enzyme E2T	Ube2t	1.0776	0.409348	0.00411549	0.039954	False
363031	anillin, actin binding protein	Anln	0.645617	1.98604	0.00412054	0.0399715	False
58834	DLC1 Rho GTPase activating protein	Dlc1	-0.368093	4.72965	0.00413485	0.040071	False
308807	protease, serine, 23	Prss23	-0.375139	8.70137	0.0041373	0.040071	False
307217	teashirt zinc finger homeobox 1	Tshz1	-0.332904	3.99513	0.0041465	0.0401284	False
81729	ribosomal protein L10A	Rpl10a	0.291708	7.72667	0.00415227	0.0401527	False
307098	neuroepithelial cell transforming 1	Net1	-0.286022	7.51793	0.00417888	0.0403783	False
292594	leukocyte immunoglobulin like receptor B4	Lilrb4	1.47801	1.45652	0.0041937	0.040484	False
684112	SIK family kinase 3	Sik3	-0.273991	5.83227	0.00419639	0.040484	False
304282	BAI1-associated protein 2-like 1	Baiap2l1	-0.265235	6.26798	0.00423442	0.0408137	False
170520	cytoglobin	Cygb	0.319463	5.0521	0.00423756	0.0408137	False
298977	zinc finger protein 277	Zfp277	0.312296	4.12662	0.00424051	0.0408137	False
64524	transketolase	Tkt	0.28433	7.91304	0.00427368	0.0411007	False
362412	RAD18 E3 ubiquitin protein ligase	Rad18	0.532313	2.91349	0.0043115	0.0414321	False
315137	apolipoprotein B mRNA editing enzyme catalytic subunit 3B	Apobec3b	0.686395	2.79482	0.00431874	0.0414694	False
117533	guanosine monophosphate reductase	Gmpr	-0.476271	3.34893	0.0043558	0.0417926	False
365864	tuftelin 1	Tuft1	0.335809	4.21322	0.00436027	0.0417951	False
291967	zinc finger, DHHC-type containing 1	Zdhhc1	-0.311163	4.55663	0.00436285	0.0417951	False
246766	glycoprotein, alpha-galactosyltransferase 1	Ggta1	-0.362482	4.26549	0.00437641	0.0418643	False
295401	phospholipid phosphatase related 4	Plppr4	-0.796121	1.55809	0.00437688	0.0418643	False
25665	sodium voltage-gated channel alpha subunit 5	Scn5a	-0.944225	0.375538	0.00439809	0.0420174	False
690987	glycogen synthase 1	Gys1	-0.306091	5.06531	0.00439971	0.0420174	False
300242	keratin 7	Krt7	0.994715	5.62727	0.00441552	0.0421357	False
81807	elongin B	Elob	0.337229	4.41158	0.00443176	0.0422579	False
310392	solute carrier family 7 member 11	Slc7a11	0.83945	4.50795	0.0044439	0.0423408	False
29282	ribosomal protein L23	Rpl23	0.310444	8.96933	0.00446836	0.042541	False
293345	TATA-box binding protein associated factor 10	Taf10	0.281644	5.055	0.004486	0.042676	False
25460	hyaluronan-mediated motility receptor	Hmmr	0.562718	2.65779	0.0045099	0.0428702	False
287435	Cd68 molecule	Cd68	0.52676	3.08329	0.00452371	0.0429682	False
367074	transmembrane protease, serine 4	Tmprss4	0.623952	3.03281	0.00453249	0.0430184	False
24974	RT1 class Ia, locus A2	RT1-A2	0.324386	4.78591	0.00454099	0.043066	False
246074	stearoyl-CoA desaturase	Scd	0.882165	1.45767	0.00454671	0.043087	False
116685	lamin B1	Lmnb1	0.393857	3.88687	0.00459311	0.0434472	False
313211	nipsnap homolog 3B	Nipsnap3b	0.42535	3.83528	0.00459416	0.0434472	False
316740	myomesin 1	Myom1	-0.696443	2.9498	0.00459531	0.0434472	False
289801	uridine phosphorylase 1	Upp1	0.43049	3.71455	0.00459917	0.0434503	False
116646	tumor protein, translationally-controlled 1	Tpt1	0.311351	10.3628	0.00461396	0.0435056	False
500046	cadherin-like and PC-esterase domain containing 1	Cped1	-0.338961	4.55313	0.00461558	0.0435056	False
313582	four and a half LIM domains 3	Fhl3	0.587429	2.28603	0.00461822	0.0435056	False
305166	glycerol-3-phosphate acyltransferase 3	Gpat3	0.458803	3.72675	0.00461916	0.0435056	False
688292	caspase recruitment domain family, member 14	Card14	1.54596	0.813168	0.00462276	0.0435062	False
363611	IBA57 homolog, iron-sulfur cluster assembly	Iba57	-0.327413	4.50038	0.00463811	0.0435927	False
500308	CECR2, histone acetyl-lysine reader	Cecr2	-0.761772	1.75611	0.00463903	0.0435927	False
309692	pericentrin	Pcnt	-0.280951	4.72165	0.00467203	0.0438694	False
310626	transmembrane protein 79	Tmem79	-0.298728	4.7661	0.00469462	0.0440479	False
25573	ubiquitin-conjugating enzyme E2I	Ube2i	0.2937	4.39573	0.00470655	0.0441262	False
294930	neutral cholesterol ester hydrolase 1	Nceh1	-0.282039	4.89051	0.00471092	0.0441335	False
314639	zinc finger RNA binding protein 2	Zfr2	-0.673382	1.74519	0.00472127	0.0441776	False
29499	sonic hedgehog	Shh	0.355509	5.13142	0.0047228	0.0441776	False
60350	CD14 molecule	Cd14	0.767821	2.70762	0.00473043	0.0442153	False
361945	periostin	Postn	0.342588	8.10074	0.00476811	0.0445245	False
305291	steroid 5 alpha-reductase 3	Srd5a3	0.324057	4.06284	0.00477074	0.0445245	False
307845	MTSS1L, I-BAR domain containing	Mtss1l	-0.322617	4.1974	0.00479755	0.0447407	False
171576	BUB1 mitotic checkpoint serine/threonine kinase B	Bub1b	0.674129	2.10912	0.00482956	0.0449933	False
360827	unc-51 like autophagy activating kinase 1	Ulk1	-0.260738	5.98574	0.0048326	0.0449933	False
306589	kelch domain containing 8B	Klhdc8b	-0.488023	2.93767	0.00483559	0.0449933	False
306792	sphingosine-1-phosphate receptor 3	S1pr3	0.700442	1.72253	0.00484095	0.0450091	False
252827	CDK5 regulatory subunit associated protein 1	Cdk5rap1	-0.312665	4.43863	0.00485544	0.0451098	False
288227	beta-site APP-cleaving enzyme 2	Bace2	0.368481	5.91512	0.00486305	0.0451271	False
64537	heparanase	Hpse	0.335895	4.55436	0.00486464	0.0451271	False
117269	ribosomal protein S6 kinase A2	Rps6ka2	-0.330077	4.06655	0.00489649	0.0453884	False
287462	calmodulin binding transcription activator 2	Camta2	-0.275794	6.20393	0.00490491	0.0454322	False
362626	arginine and serine rich protein 1	Rsrp1	-0.292314	8.68243	0.00491604	0.0454781	False
499782	ribosomal protein L12	Rpl12	0.286688	8.09345	0.00491725	0.0454781	False
54230	BTG anti-proliferation factor 3	Btg3	0.417089	3.62243	0.00492669	0.0455312	False
293711	HRAS-like suppressor family, member 5	Hrasls5	0.850545	0.985582	0.00493383	0.0455511	False
291057	eukaryotic translation elongation factor 1 epsilon 1	Eef1e1	0.297619	4.47111	0.00493625	0.0455511	False
64035	glycogen phosphorylase L	Pygl	0.28697	4.97263	0.00495573	0.0456966	False
311210	tetraspanin 18	Tspan18	-0.514524	3.27334	0.00496171	0.0457175	False
315524	transmembrane protein 45b	Tmem45b	0.396262	6.22005	0.00497149	0.0457734	False
315447	cysteine and histidine rich domain containing 1	Chordc1	0.27309	5.13501	0.00498441	0.045858	False
362182	reticulocalbin 1	Rcn1	0.359649	3.83652	0.00499931	0.045929	False
301254	alanyl-tRNA synthetase 2, mitochondrial	Aars2	-0.362061	3.7904	0.00499958	0.045929	False
94198	proteasome subunit beta 1	Psmb1	0.270913	6.94633	0.00500641	0.0459487	False
361430	piezo-type mechanosensitive ion channel component 1	Piezo1	0.40508	4.14996	0.00501	0.0459487	False
83681	cytokine inducible SH2-containing protein	Cish	-0.321984	4.70162	0.00501292	0.0459487	False
502776	secernin 1	Scrn1	-0.770808	2.0643	0.00502586	0.046033	False
287608	SPT4 homolog, DSIF elongation factor subunit	Supt4h1	0.263458	5.43586	0.00508766	0.0465644	False
83508	timeless circadian regulator	Timeless	0.691554	2.12534	0.00511165	0.0467492	False
313427	ubiquitin specific peptidase 24	Usp24	-0.243525	6.269	0.00512548	0.0468408	False
94201	cyclin-dependent kinase 4	Cdk4	0.253834	5.86043	0.00513029	0.04685	False
308134	transmembrane protein 35A	Tmem35a	-1.16464	-0.19891	0.00519583	0.0474134	False
282844	ring finger and FYVE-like domain containing E3 ubiquitin protein ligase	Rffl	0.26055	5.18617	0.00524031	0.0477839	False
300732	proline-serine-threonine phosphatase-interacting protein 1	Pstpip1	0.800808	1.39722	0.0052541	0.0478741	False
116725	ubiquitin-conjugating enzyme E2N	Ube2n	0.315181	4.48523	0.00526434	0.047932	False
298071	N-acetylneuraminate synthase	Nans	0.267555	6.66065	0.00529971	0.0482183	False
89843	CXADR, Ig-like cell adhesion molecule	Cxadr	0.291693	4.68023	0.0053346	0.0484999	False
64015	KH RNA binding domain containing, signal transduction associated 3	Khdrbs3	-0.273436	4.92104	0.00535389	0.0486394	False
361472	methylenetetrahydrofolate dehydrogenase (NADP+ dependent) 1-like	Mthfd1l	0.654095	2.60995	0.00537451	0.0487907	False
192208	solute carrier family 38, member 5	Slc38a5	-0.68375	2.29758	0.00539418	0.0489332	False
81768	ribosomal protein L22	Rpl22	0.246659	6.38814	0.00542084	0.0491388	False
306141	sprouty RTK signaling antagonist 2	Spry2	0.264153	4.79523	0.00543782	0.0492269	False
83472	UDP-glucose 6-dehydrogenase	Ugdh	0.289948	7.1461	0.00543856	0.0492269	False
304663	LYL1, basic helix-loop-helix family member	Lyl1	0.903609	0.763725	0.00544798	0.0492457	False
500013	similar to sterile alpha motif domain containing 9-like	LOC500013	0.334219	4.59391	0.00544863	0.0492457	False
246302	prenylcysteine oxidase 1	Pcyox1	-0.279631	5.18412	0.00546317	0.0493409	False
414783	RT1 class I, locus CE4	RT1-CE4	0.381413	4.30344	0.00546844	0.0493523	False
64156	ubiquitin A-52 residue ribosomal protein fusion product 1	Uba52	0.321828	8.30139	0.00550619	0.0496566	False
25033	somatostatin receptor 1	Sstr1	-0.706247	1.57172	0.00551417	0.0496921	False
292699	Cbl proto-oncogene C	Cblc	0.30574	4.88087	0.00552899	0.0497851	False
295050	exosome component 8	Exosc8	0.385642	3.86678	0.00553258	0.0497851	False
304815	E74 like ETS transcription factor 3	Elf3	0.283829	8.23845	0.00554032	0.0498183	False

## Sheet: Muscle
Anisakis-infected muscle tissues of Sprague-Dawley rats
Entrez Gene ID	Gene description	Gene symbol	logFC	logCPM	p value	FDR	TREAT
81503	C-X-C motif chemokine ligand 1	Cxcl1	3.05939	4.71159	9.06158e-39	1.05441e-34	True
116547	S100 calcium binding protein A8	S100a8	4.61854	3.96798	5.91695e-25	3.44248e-21	True
360622	insulin-like growth factor binding protein 4	Igfbp4	2.08265	6.70147	1.16957e-22	4.53636e-19	True
24482	insulin-like growth factor 1	Igf1	2.07294	4.40766	1.40327e-19	4.08212e-16	True
24770	C-C motif chemokine ligand 2	Ccl2	3.7993	6.07036	2.1661e-18	5.04095e-15	True
296269	angiopoietin 4	Angpt4	3.04184	1.8294	3.89505e-17	7.5538e-14	True
364081	interferon regulatory factor 6	Irf6	3.07175	2.19512	4.84065e-17	8.04654e-14	True
94195	S100 calcium binding protein A9	S100a9	4.40545	4.2547	7.87463e-17	1.02721e-13	True
313211	nipsnap homolog 3B	Nipsnap3b	2.5516	2.47505	7.94507e-17	1.02721e-13	True
292541	NLR family, pyrin domain containing 12	Nlrp12	5.55024	1.00201	1.20523e-16	1.40241e-13	True
294090	interferon-induced protein with tetratricopeptide repeats 1B-like	Ifit1bl	3.05896	2.43117	1.87868e-16	1.9873e-13	True
297738	STEAP family member 1	Steap1	3.041	1.62003	3.04684e-16	2.95442e-13	True
362861	solute carrier family 41 member 2	Slc41a2	2.24293	3.67121	2.00388e-15	1.79362e-12	True
64045	glutaredoxin	Glrx	1.99493	4.87244	4.28234e-15	3.55924e-12	True
83472	UDP-glucose 6-dehydrogenase	Ugdh	1.87237	5.72542	5.89431e-15	4.57241e-12	True
297073	retinoic acid receptor responder 2	Rarres2	1.61943	6.34067	6.19262e-14	4.50358e-11	True
24451	heme oxygenase 1	Hmox1	1.75083	6.82089	7.56037e-14	5.17485e-11	True
367215	triggering receptor expressed on myeloid cells 3	Trem3	3.7409	0.40388	1.07365e-13	6.94052e-11	True
303909	stefin A2	Stfa2	4.26478	-0.0905728	1.31039e-13	8.02511e-11	True
29244	GTP cyclohydrolase 1	Gch1	2.37708	1.95479	2.64453e-13	1.53859e-10	True
114119	G protein subunit gamma 10	Gng10	1.27255	5.07299	4.46398e-13	2.47347e-10	False
79559	activated leukocyte cell adhesion molecule	Alcam	1.9874	2.85101	5.18561e-13	2.74271e-10	True
24237	complement C6	C6	2.17041	4.55332	8.30922e-13	4.05513e-10	True
25406	CD44 molecule (Indian blood group)	Cd44	1.85664	5.65094	8.36396e-13	4.05513e-10	True
29385	C-X-C motif chemokine receptor 2	Cxcr2	3.05185	1.16902	1.43654e-12	6.68623e-10	True
25478	mannosidase, alpha, class 2A, member 1	Man2a1	1.43566	5.13057	1.52157e-12	6.79105e-10	False
296621	phytanoyl-CoA dioxygenase domain containing 1	Phyhd1	1.91565	4.38519	1.59812e-12	6.79105e-10	True
24930	CD8a molecule	Cd8a	3.4974	1.01741	1.63415e-12	6.79105e-10	True
304608	matrix metallopeptidase 19	Mmp19	1.82192	4.03282	3.13147e-12	1.25648e-09	True
25661	fibronectin 1	Fn1	2.19874	9.01853	3.3632e-12	1.30447e-09	True
29259	selectin L	Sell	2.77907	2.21136	3.59631e-12	1.34989e-09	True
54410	ectonucleotide pyrophosphatase/phosphodiesterase 3	Enpp3	1.83315	7.25319	5.28208e-12	1.9207e-09	True
287835	galactokinase 1	Galk1	1.716	3.25057	8.30082e-12	2.92692e-09	True
289388	G0/G1switch 2	G0s2	2.43959	3.13181	1.24213e-11	4.25101e-09	True
24929	prostaglandin E receptor 3	Ptger3	2.75455	1.42652	1.30709e-11	4.34553e-09	True
500349	G protein-coupled receptor, class C, group 5, member D	Gprc5d	2.6491	1.31344	1.35779e-11	4.38866e-09	True
303413	myeloperoxidase	Mpo	3.13606	1.63373	1.61764e-11	5.08727e-09	True
282821	hyaluronan synthase 1	Has1	2.22964	2.82739	1.8051e-11	5.52741e-09	True
316614	ankyrin repeat and SOCS box-containing 18	Asb18	-1.42639	4.42563	2.5275e-11	7.54104e-09	False
60582	interleukin 1 receptor antagonist	Il1rn	4.22082	3.42725	2.743e-11	7.97937e-09	True
300438	low density lipoprotein receptor	Ldlr	1.53736	5.6894	2.92962e-11	8.31442e-09	False
308797	cell migration-inducing hyaluronan binding protein	Cemip	2.45451	0.833666	4.81684e-11	1.33449e-08	True
64191	7-dehydrocholesterol reductase	Dhcr7	2.0936	1.7741	5.35876e-11	1.45011e-08	True
361945	periostin	Postn	1.52038	6.87389	6.12404e-11	1.61953e-08	False
81506	bone marrow stromal cell antigen 1	Bst1	2.20043	2.03313	7.39879e-11	1.91316e-08	True
25216	syndecan 1	Sdc1	2.50565	3.80056	8.31946e-11	2.10446e-08	True
500292	cell death-inducing DFFA-like effector c	Cidec	2.79884	5.806	9.81447e-11	2.39313e-08	True
246118	tubulin, beta 3 class III	Tubb3	2.45498	2.15947	9.87196e-11	2.39313e-08	True
25556	interleukin 1 receptor-like 1	Il1rl1	2.09881	3.06855	1.19274e-10	2.8324e-08	True
81505	epithelial membrane protein 3	Emp3	1.4927	5.10215	1.61873e-10	3.76711e-08	False
94340	acyl-CoA synthetase long-chain family member 5	Acsl5	1.7925	5.01391	1.6615e-10	3.79082e-08	True
362696	tetratricopeptide repeat domain 7A	Ttc7a	1.24235	4.32253	1.76939e-10	3.95934e-08	False
679787	C-type lectin domain containing 5A	Clec5a	3.26976	0.951547	1.86809e-10	4.10135e-08	True
290995	PRELI domain containing 1	Prelid1	1.12547	5.37112	2.27166e-10	4.895e-08	False
24615	S100 calcium-binding protein A4	S100a4	2.25317	5.79766	2.93332e-10	6.20583e-08	True
25353	secreted phosphoprotein 1	Spp1	2.17286	7.34372	3.22862e-10	6.70861e-08	True
50719	solute carrier family 7 member 5	Slc7a5	2.27218	3.59336	3.77501e-10	7.70632e-08	True
25708	uncoupling protein 3	Ucp3	-1.48246	5.91711	3.9713e-10	7.96726e-08	False
24252	CCAAT/enhancer binding protein alpha	Cebpa	2.38079	5.14041	4.08356e-10	8.05361e-08	True
298518	colony stimulating factor 3 receptor	Csf3r	3.30549	3.12696	6.5206e-10	1.26456e-07	True
29592	branched chain amino acid transaminase 1	Bcat1	1.92934	4.42088	8.66988e-10	1.65382e-07	True
25542	C-C motif chemokine ligand 3	Ccl3	3.49481	1.85842	1.15398e-09	2.16577e-07	True
80843	Sec61 translocon alpha 1 subunit	Sec61a1	1.12603	6.09744	1.20395e-09	2.22368e-07	False
116663	dual specificity phosphatase 6	Dusp6	1.25524	4.50358	1.58404e-09	2.87999e-07	False
29538	C-C motif chemokine ligand 20	Ccl20	3.89551	0.700453	1.76484e-09	3.15933e-07	True
293618	interferon induced transmembrane protein 1	Ifitm1	1.65992	5.13802	1.83548e-09	3.20434e-07	False
293710	galectin 12	Lgals12	3.0775	2.84641	1.84506e-09	3.20434e-07	True
24953	glucagon receptor	Gcgr	5.49985	2.6969	2.4e-09	4.10682e-07	True
29496	erb-b2 receptor tyrosine kinase 3	Erbb3	1.78503	4.32182	2.53224e-09	4.27031e-07	False
65146	paired Ig-like receptor B	Pirb	2.97902	1.12336	2.86989e-09	4.77058e-07	True
294643	LHFPL tetraspan subfamily member 2	Lhfpl2	1.49699	3.89483	3.15369e-09	5.12153e-07	False
25690	aryl hydrocarbon receptor	Ahr	1.37098	3.7459	3.16905e-09	5.12153e-07	False
360457	vascular endothelial growth factor D	Vegfd	1.2638	4.0934	3.2369e-09	5.15953e-07	False
299699	aldehyde dehydrogenase 1 family, member L2	Aldh1l2	2.97589	1.83503	3.47872e-09	5.47005e-07	True
79113	FGR proto-oncogene, Src family tyrosine kinase	Fgr	2.72612	3.43709	3.81231e-09	5.91468e-07	True
66015	ADAM metallopeptidase with thrombospondin type 1 motif, 4	Adamts4	2.58284	3.00271	4.09524e-09	6.27002e-07	True
24795	serine (or cysteine) peptidase inhibitor, clade A, member 3N	Serpina3n	3.78838	8.03216	4.5814e-09	6.92327e-07	True
360406	protein tyrosine phosphatase, receptor type, F	Ptprf	1.52419	4.29389	7.3535e-09	1.09699e-06	False
500047	Wnt family member 16	Wnt16	-1.83879	2.38713	7.83333e-09	1.14844e-06	False
306009	solute carrier family 39 member 14	Slc39a14	2.13432	6.51011	7.89575e-09	1.14844e-06	True
25445	FOS like 1, AP-1 transcription factor subunit	Fosl1	1.9879	1.7023	8.6095e-09	1.23679e-06	True
54320	podoplanin	Pdpn	1.60682	6.41048	9.15447e-09	1.29904e-06	False
24772	C-X-C motif chemokine ligand 12	Cxcl12	1.00387	6.2356	1.06153e-08	1.48819e-06	False
89829	suppressor of cytokine signaling 3	Socs3	2.09897	4.59442	1.09112e-08	1.51146e-06	True
500246	Rho GTPase activating protein 25	Arhgap25	1.86724	2.61214	1.13303e-08	1.55105e-06	False
29230	squalene epoxidase	Sqle	1.74899	2.29878	1.14969e-08	1.55505e-06	False
297339	capping actin protein, gelsolin like	Capg	1.14448	5.05575	1.16268e-08	1.55505e-06	False
680945	stromal cell-derived factor 2-like 1	Sdf2l1	1.31864	4.23552	1.23747e-08	1.63627e-06	False
80881	stress-associated endoplasmic reticulum protein 1	Serp1	1.22064	6.04206	1.34505e-08	1.75855e-06	False
305340	RNA binding motif protein 47	Rbm47	1.71872	1.93377	1.36439e-08	1.76128e-06	False
293677	EGF containing fibulin extracellular matrix protein 2	Efemp2	1.12817	4.97088	1.37742e-08	1.76128e-06	False
25663	interleukin 1 receptor type 1	Il1r1	1.28054	3.81346	1.39673e-08	1.76256e-06	False
100365935	centrosomal protein 85-like	Cep85l	-0.993547	5.08451	1.40871e-08	1.76256e-06	False
114122	versican	Vcan	3.29832	6.01141	1.45076e-08	1.79585e-06	True
498128	mast cell-expressed membrane protein 1	Mcemp1	3.95744	2.7647	1.60373e-08	1.96431e-06	True
287910	chemokine (C-C motif) ligand 6	Ccl6	1.41317	5.84766	1.67099e-08	2.02538e-06	False
298500	small ArfGAP2	Smap2	1.22397	5.13209	1.70407e-08	2.04418e-06	False
29645	protein tyrosine phosphatase, receptor type, J	Ptprj	1.43947	4.19899	1.7931e-08	2.12904e-06	False
317227	toll-like receptor 13	Tlr13	1.90589	3.34943	2.08647e-08	2.45233e-06	False
301232	similar to AI661453 protein	RGD1561662	2.70148	0.893783	2.31991e-08	2.69945e-06	True
691993	SLP adaptor and CSK interacting membrane protein	Scimp	3.70825	1.80554	2.533e-08	2.91822e-06	True
500956	hypothetical protein LOC500956	LOC500956	1.70314	2.30505	2.62445e-08	2.99393e-06	False
114247	schlafen 4	Slfn4	2.28965	5.46014	2.71112e-08	3.06277e-06	True
295279	Fc fragment of IgG receptor Ia	Fcgr1a	2.21159	3.80591	2.8577e-08	3.18398e-06	True
680319	transcription elongation factor A like 7	Tceal7	-1.21399	4.9333	2.87313e-08	3.18398e-06	False
304929	coagulation factor V	F5	3.08261	3.41423	3.18757e-08	3.49912e-06	True
29743	solute carrier family 25 member 1	Slc25a1	1.84556	3.70996	3.31867e-08	3.60898e-06	False
311483	ribosome binding protein 1	Rrbp1	0.984503	6.53124	3.40583e-08	3.66946e-06	False
353250	niacin receptor 1	Niacr1	3.41578	2.33305	3.79684e-08	4.05322e-06	True
114628	ATP binding cassette subfamily G member 5	Abcg5	4.61295	0.493857	4.05538e-08	4.25966e-06	True
311785	pleckstrin and Sec7 domain containing 4	Psd4	2.34246	1.81579	4.06344e-08	4.25966e-06	True
500690	mitogen-activated protein kinase kinase kinase 9	Map3k9	2.63304	-0.0738915	4.17929e-08	4.34198e-06	True
500040	testin LIM domain protein	Tes	1.4785	3.24494	4.39934e-08	4.53015e-06	False
315989	mesencephalic astrocyte-derived neurotrophic factor	Manf	0.9811	5.98917	4.4924e-08	4.57207e-06	False
298543	crystallin beta-gamma domain containing 2	Crybg2	4.35553	0.56806	4.51863e-08	4.57207e-06	True
81804	syntaxin binding protein 2	Stxbp2	1.93248	2.84902	4.73081e-08	4.73198e-06	False
300691	nicotinamide N-methyltransferase	Nnmt	2.45349	3.66864	4.75801e-08	4.73198e-06	True
306071	lymphocyte cytosolic protein 1	Lcp1	1.90371	5.80174	5.13266e-08	5.06132e-06	False
24218	ATPase copper transporting beta	Atp7b	4.232	0.822304	5.25253e-08	5.136e-06	True
291327	mannose receptor, C type 1	Mrc1	1.06135	6.00772	5.50177e-08	5.31322e-06	False
690906	leukocyte immunoglobulin-like receptor, subfamily C, member 2	Lilrc2	2.85492	0.103639	5.52509e-08	5.31322e-06	True
294747	similar to BC067074 protein	RGD1561161	-1.10932	4.94554	5.73191e-08	5.42449e-06	False
25293	aquaporin 4	Aqp4	-1.64224	3.52475	5.73403e-08	5.42449e-06	False
83781	galectin 3	Lgals3	1.43912	6.35262	5.86331e-08	5.50205e-06	False
58835	phosphoglycerate dehydrogenase	Phgdh	1.85264	2.76917	6.58625e-08	6.13101e-06	False
312679	interleukin 17 receptor A	Il17ra	1.70745	4.97814	6.82177e-08	6.29985e-06	False
64025	CD244 molecule	Cd244	2.48639	0.850899	6.8824e-08	6.30579e-06	True
29636	coagulation factor II (thrombin) receptor-like 2	F2rl2	2.18054	0.777699	7.03554e-08	6.35227e-06	True
25176	solute carrier family 25 member 5	Slc25a5	1.5613	5.95408	7.04231e-08	6.35227e-06	False
362226	Sec23 homolog B, coat complex II component	Sec23b	1.03465	4.36306	7.10373e-08	6.35838e-06	False
361680	lymphocyte-specific protein 1	Lsp1	1.30885	5.81577	7.21324e-08	6.40712e-06	False
94338	sphingomyelin phosphodiesterase 3	Smpd3	1.2516	4.61524	7.27561e-08	6.41081e-06	False
245955	galectin 3 binding protein	Lgals3bp	1.28992	5.03097	7.32759e-08	6.41081e-06	False
116548	proprotein convertase subtilisin/kexin type 5	Pcsk5	1.49169	5.3884	8.57056e-08	7.3968e-06	False
29659	purinergic receptor P2X 4	P2rx4	1.19766	3.80206	8.63155e-08	7.3968e-06	False
499337	dedicator of cytokinesis 8	Dock8	1.55319	3.10641	8.64528e-08	7.3968e-06	False
114105	C-X-C motif chemokine ligand 2	Cxcl2	3.76114	2.88655	9.2217e-08	7.83239e-06	True
29353	phosphorylase kinase catalytic subunit gamma 1	Phkg1	-0.987639	5.20439	9.58161e-08	8.0791e-06	False
25670	interleukin 15	Il15	-0.967011	4.62348	1.00437e-07	8.40782e-06	False
367455	leucine-rich alpha-2-glycoprotein 1	Lrg1	1.10897	4.80075	1.01998e-07	8.47751e-06	False
498875	alpha-kinase 2	Alpk2	-1.1396	4.90952	1.07431e-07	8.86571e-06	False
29427	allograft inflammatory factor 1	Aif1	2.0364	3.77518	1.15837e-07	9.49213e-06	False
29197	interleukin 18	Il18	1.73931	2.15646	1.18496e-07	9.6421e-06	False
360854	actin related protein 2/3 complex, subunit 5	Arpc5	1.1736	5.96868	1.26732e-07	1.02406e-05	False
303004	transmembrane protein 8A	Tmem8a	2.08799	2.31804	1.33512e-07	1.07141e-05	False
310982	tubulin tyrosine ligase like 7	Ttll7	-1.10961	6.21518	1.38797e-07	1.1062e-05	False
291983	proteasome subunit beta 10	Psmb10	1.35398	3.82604	1.52062e-07	1.1998e-05	False
362456	Rho GDP dissociation inhibitor beta	Arhgdib	1.15963	5.45433	1.52604e-07	1.1998e-05	False
315707	C-terminal Src kinase	Csk	1.0438	4.59496	1.64772e-07	1.28677e-05	False
690919	neuregulin 4	Nrg4	4.09003	1.47018	1.77298e-07	1.37502e-05	True
287722	transmembrane protein 106A	Tmem106a	1.63065	2.20031	1.78436e-07	1.37502e-05	False
501738	CD300 molecule-like family member b	Cd300lb	2.1355	1.7067	1.93537e-07	1.48157e-05	False
59114	SLC9A3 regulator 1	Slc9a3r1	1.24398	4.47558	1.96302e-07	1.49292e-05	False
140582	DNA-damage-inducible transcript 4-like 2	Ddit4l2	-1.69717	6.09656	2.11827e-07	1.59037e-05	False
298068	Sec61 translocon beta subunit	Sec61b	1.18111	4.74474	2.11848e-07	1.59037e-05	False
680611	B-cell CLL/lymphoma 3	Bcl3	1.75802	3.56767	2.60501e-07	1.94307e-05	False
81515	LYN proto-oncogene, Src family tyrosine kinase	Lyn	1.79964	4.65281	2.68527e-07	1.99018e-05	False
310553	toll-like receptor 2	Tlr2	2.59094	3.07638	2.74536e-07	2.02184e-05	True
315348	NCK associated protein 1 like	Nckap1l	1.62914	3.80429	2.88667e-07	2.11253e-05	False
287561	C-C motif chemokine ligand 7	Ccl7	3.50319	5.18463	2.93386e-07	2.13365e-05	True
316737	lipin 2	Lpin2	1.52187	4.14717	2.9624e-07	2.14103e-05	False
286921	aldo-keto reductase family 1, member B8	Akr1b8	1.5884	2.47328	3.07298e-07	2.20723e-05	False
64035	glycogen phosphorylase L	Pygl	1.86513	3.88462	3.16678e-07	2.26065e-05	False
307742	sorting nexin 20	Snx20	2.19843	0.957159	3.34827e-07	2.35258e-05	False
24251	Cd53 molecule	Cd53	2.01529	4.32173	3.35447e-07	2.35258e-05	False
84397	TNF alpha induced protein 6	Tnfaip6	2.95352	5.09009	3.35621e-07	2.35258e-05	True
361537	Tyro protein tyrosine kinase binding protein	Tyrobp	2.092	4.82548	3.39778e-07	2.36746e-05	False
287435	Cd68 molecule	Cd68	1.54098	4.52441	3.57899e-07	2.47888e-05	False
363040	ST3 beta-galactoside alpha-2,3-sialyltransferase 4	St3gal4	1.19199	4.07343	3.8484e-07	2.64111e-05	False
54355	Ras association domain family member 5	Rassf5	1.54359	3.14246	3.85861e-07	2.64111e-05	False
60350	CD14 molecule	Cd14	1.93871	5.31647	3.95242e-07	2.68643e-05	False
303741	fascin actin-bundling protein 2, retinal	Fscn2	-1.70001	2.79329	3.971e-07	2.68643e-05	False
361749	interleukin 33	Il33	0.886814	5.6001	4.00361e-07	2.69283e-05	False
171045	matrix metallopeptidase 3	Mmp3	2.88989	0.111215	4.34072e-07	2.9028e-05	True
445442	thrombospondin 1	Thbs1	2.05579	6.10873	4.38702e-07	2.91699e-05	False
299783	GLI pathogenesis-related 1	Glipr1	2.09014	3.25276	4.47883e-07	2.96112e-05	False
307404	arylsulfatase family, member I	Arsi	2.03543	1.83416	4.95456e-07	3.25713e-05	False
312903	translocation associated membrane protein 1	Tram1	0.979207	6.69655	5.09827e-07	3.33278e-05	False
245920	C-X-C motif chemokine ligand 10	Cxcl10	1.73466	2.11359	5.14001e-07	3.34129e-05	False
290361	docking protein 2	Dok2	2.03213	3.63516	5.41426e-07	3.50002e-05	False
364134	trans-2,3-enoyl-CoA reductase-like	Tecrl	-1.82334	1.66597	5.66133e-07	3.63952e-05	False
498638	macrophage scavenger receptor 1	Msr1	2.46369	3.62522	5.69303e-07	3.63978e-05	True
360739	RAN binding protein 1	Ranbp1	0.991388	4.78639	6.16958e-07	3.90831e-05	False
312052	STEAP2 metalloreductase	Steap2	1.72228	3.28158	6.19249e-07	3.90831e-05	False
25122	sodium channel epithelial 1 alpha subunit	Scnn1a	1.68689	1.43059	6.2138e-07	3.90831e-05	False
171341	microsomal glutathione S-transferase 1	Mgst1	3.22562	7.44256	6.40892e-07	3.96669e-05	True
25441	Fc fragment of IgE receptor Ig	Fcer1g	2.09771	5.56653	6.41413e-07	3.96669e-05	False
60338	FXYD domain-containing ion transport regulator 5	Fxyd5	1.52819	4.27651	6.42684e-07	3.96669e-05	False
311570	myosin heavy chain 7B	Myh7b	-0.95844	4.84608	6.44298e-07	3.96669e-05	False
361422	coactosin-like F-actin binding protein 1	Cotl1	2.02125	5.20091	6.52283e-07	3.99472e-05	False
50676	solute carrier family 6 member 12	Slc6a12	2.99016	0.722563	6.69343e-07	4.07773e-05	True
64357	CD200 receptor 1	Cd200r1	1.88597	2.63981	6.76658e-07	4.08055e-05	False
29278	LIM and SH3 protein 1	Lasp1	0.971345	5.55849	6.78135e-07	4.08055e-05	False
298744	cysteine rich transmembrane BMP regulator 1	Crim1	-0.924569	6.00144	6.80325e-07	4.08055e-05	False
24811	transporter 1, ATP binding cassette subfamily B member	Tap1	1.23685	4.19531	6.89307e-07	4.11322e-05	False
290029	purine nucleoside phosphorylase	Pnp	1.16213	6.24507	6.94939e-07	4.12567e-05	False
363054	myelin protein zero-like 3	Mpzl3	1.83482	0.742204	7.05779e-07	4.16876e-05	False
259167	ADP-ribosyltransferase 5	Art5	-0.981742	6.5413	7.45829e-07	4.38306e-05	False
310486	retinoic acid receptor responder 1	Rarres1	1.36368	2.75014	7.7254e-07	4.51722e-05	False
499285	ADAM metallopeptidase domain 8	Adam8	2.50135	2.82089	7.97228e-07	4.63827e-05	True
353252	retinol dehydrogenase 10	Rdh10	1.13284	3.55773	8.17017e-07	4.72975e-05	False
362115	family with sequence similarity 129, member B	Fam129b	0.906644	5.26782	8.32035e-07	4.79285e-05	False
309301	RNA terminal phosphate cyclase-like 1	Rcl1	0.84762	5.36907	8.40353e-07	4.81692e-05	False
113940	glia maturation factor, gamma	Gmfg	1.70497	4.15493	8.71607e-07	4.97158e-05	False
114511	embigin	Emb	1.40532	2.33629	9.64787e-07	5.47622e-05	False
25267	platelet derived growth factor receptor alpha	Pdgfra	1.06365	6.59513	9.92325e-07	5.60132e-05	False
306490	myotubularin related protein 7	Mtmr7	2.08469	0.50555	9.96453e-07	5.60132e-05	False
290651	inositol-3-phosphate synthase 1	Isyna1	1.12085	4.89854	1.01311e-06	5.66755e-05	False
300947	transcription factor Dp-2	Tfdp2	-0.876829	4.78472	1.0284e-06	5.72558e-05	False
85246	growth arrest specific 7	Gas7	1.37828	3.5595	1.08356e-06	6.00397e-05	False
301416	coenzyme Q10B	Coq10b	1.05721	3.8322	1.12874e-06	6.22465e-05	False
100360606	zinc finger RANBP2-type containing 1	Zranb1	-1.08562	6.00369	1.174e-06	6.44369e-05	False
360896	estrogen-related receptor gamma	Esrrg	-1.20972	4.02061	1.18421e-06	6.45552e-05	False
306127	aconitate decarboxylase 1	Acod1	4.11395	1.84249	1.18725e-06	6.45552e-05	True
117103	RAB8A, member RAS oncogene family	Rab8a	0.90581	4.74205	1.20733e-06	6.53419e-05	False
315500	endonuclease/exonuclease/phosphatase family domain containing 1	Eepd1	-1.28395	6.73266	1.24793e-06	6.72265e-05	False
308478	sprouty-related, EVH1 domain containing 3	Spred3	1.71035	1.20839	1.33e-06	7.13174e-05	False
156767	TNF receptor superfamily member 1B	Tnfrsf1b	1.58403	3.89172	1.34318e-06	7.16938e-05	False
29624	arachidonate 5-lipoxygenase activating protein	Alox5ap	1.25764	4.17265	1.38109e-06	7.311e-05	False
311374	dual oxidase maturation factor 1	Duoxa1	2.048	2.17793	1.38228e-06	7.311e-05	False
406864	chloride intracellular channel 1	Clic1	1.03891	5.28082	1.4104e-06	7.42596e-05	False
290644	IFI30, lysosomal thiol reductase	Ifi30	1.41476	5.38736	1.42934e-06	7.47729e-05	False
50692	plasminogen activator, urokinase receptor	Plaur	2.31337	2.99171	1.4352e-06	7.47729e-05	False
246248	flavin containing monooxygenase 5	Fmo5	2.75066	4.21543	1.43942e-06	7.47729e-05	True
308995	integrin subunit alpha L	Itgal	2.0628	2.67377	1.45047e-06	7.5012e-05	False
64185	cyclase associated actin cytoskeleton regulatory protein 1	Cap1	1.03562	6.17521	1.61778e-06	8.32944e-05	False
56611	annexin A2	Anxa2	1.6514	7.159	1.64868e-06	8.45113e-05	False
25408	Cd80 molecule	Cd80	2.62871	-0.264044	1.67128e-06	8.52937e-05	True
289747	oncostatin M	Osm	2.73486	1.62764	1.69931e-06	8.63455e-05	True
314694	carbohydrate sulfotransferase 11	Chst11	1.68551	0.632502	1.97186e-06	9.9759e-05	False
246250	resistin	Retn	3.42291	6.46119	2.04443e-06	0.000102983	True
311406	dual specificity phosphatase 2	Dusp2	1.93125	0.307213	2.07266e-06	0.000103955	False
304988	myeloid cell nuclear differentiation antigen	Mnda	1.18368	5.02419	2.1014e-06	0.000104944	False
394266	gap junction protein, beta 2	Gjb2	1.99213	1.6834	2.14516e-06	0.000106134	False
54227	actin related protein 2/3 complex, subunit 1B	Arpc1b	1.31824	6.67569	2.14602e-06	0.000106134	False
65036	butyrylcholinesterase	Bche	2.12512	2.69947	2.15261e-06	0.000106134	False
298609	EF-hand domain family, member D2	Efhd2	1.3064	5.38983	2.17591e-06	0.000106727	False
25326	Janus kinase 3	Jak3	1.45377	2.50893	2.18296e-06	0.000106727	False
315939	2-phosphoxylose phosphatase 1	Pxylp1	1.09544	4.04153	2.25448e-06	0.000109762	False
294674	ectodermal-neural cortex 1	Enc1	1.07975	6.158	2.28451e-06	0.000110761	False
24443	histidine decarboxylase	Hdc	1.49346	2.16931	2.30781e-06	0.000111426	False
362895	SH3 and cysteine rich domain 3	Stac3	-0.833118	6.31611	2.34732e-06	0.000112865	False
310791	solute carrier family 25 member 24	Slc25a24	0.97443	4.50356	2.3708e-06	0.000113525	False
25464	intercellular adhesion molecule 1	Icam1	1.57106	4.3021	2.41733e-06	0.000115041	False
288774	signal transducer and activator of transcription 2	Stat2	0.815733	5.40441	2.42224e-06	0.000115041	False
29271	cofilin 1	Cfl1	1.53924	7.54606	2.58673e-06	0.000122354	False
29516	phosphodiesterase 3B	Pde3b	1.99425	3.78768	2.69745e-06	0.000126746	False
499271	integrin subunit alpha X	Itgax	2.48142	1.99631	2.70415e-06	0.000126746	True
81718	cysteine dioxygenase type 1	Cdo1	2.37229	8.14646	2.71224e-06	0.000126746	False
500904	neutrophil cytosolic factor 4	Ncf4	2.04836	3.33185	2.87086e-06	0.000133197	False
294708	small glutamine rich tetratricopeptide repeat containing beta	Sgtb	-0.94068	4.49963	2.87318e-06	0.000133197	False
303476	ABI family, member 3	Abi3	1.54573	2.20613	3.014e-06	0.00013917	False
292199	Kiaa0408-like	Kiaa0408L	-0.846894	5.40667	3.02999e-06	0.000139355	False
79129	cytochrome b-245 alpha chain	Cyba	1.47924	4.34769	3.10735e-06	0.000142351	False
295691	frizzled-related protein	Frzb	2.72043	2.2337	3.17052e-06	0.000144675	True
302377	similar to RIKEN cDNA A630033H20 gene	RGD1560455	1.79818	0.281581	3.28489e-06	0.000149309	False
78965	colony stimulating factor 1	Csf1	1.16785	5.19378	3.32168e-06	0.000150393	False
170929	BCL2-related protein A1	Bcl2a1	2.66683	2.76158	3.42863e-06	0.000154382	True
305450	SH3-domain binding protein 2	Sh3bp2	1.2222	2.93772	3.43931e-06	0.000154382	False
307907	similar to RIKEN cDNA 6430548M08	RGD1304884	1.33213	2.63736	3.46214e-06	0.000154382	False
294329	transient receptor potential cation channel, subfamily M, member 2	Trpm2	2.35391	1.17252	3.46285e-06	0.000154382	False
24699	protein tyrosine phosphatase, receptor type, C	Ptprc	1.90648	4.40144	3.57629e-06	0.000158831	False
286906	protein disulfide isomerase family A, member 6	Pdia6	1.05894	7.12492	3.64858e-06	0.00015884	False
310849	sphingomyelin synthase 2	Sgms2	2.17965	1.69962	3.65584e-06	0.00015884	False
116598	protein disulfide isomerase family A, member 4	Pdia4	1.13467	6.368	3.65744e-06	0.00015884	False
309527	cholesterol 25-hydroxylase	Ch25h	1.78322	1.16229	3.66533e-06	0.00015884	False
298544	SH3 domain binding glutamate-rich protein like 3	Sh3bgrl3	1.33212	4.70306	3.66798e-06	0.00015884	False
25341	TNF receptor superfamily member 11B	Tnfrsf11b	1.15358	5.00351	3.68688e-06	0.00015884	False
689388	pentraxin 3	Ptx3	3.69109	6.21042	3.69983e-06	0.00015884	True
315962	kyphoscoliosis peptidase	Ky	-0.992157	4.5733	3.70877e-06	0.00015884	False
364678	sideroflexin 1	Sfxn1	2.08728	5.12392	3.71158e-06	0.00015884	False
304823	immunoglobulin-like and fibronectin type III domain containing 1	Igfn1	-1.31633	9.21824	3.713e-06	0.00015884	False
83801	parathymosin	Ptms	0.992976	6.34885	3.74235e-06	0.000159509	False
445415	S100 calcium binding protein A11	S100a11	1.44646	5.63062	4.02326e-06	0.000170623	False
171064	immunoglobulin superfamily, member 6	Igsf6	1.76556	2.60721	4.0445e-06	0.000170623	False
682360	family with sequence similarity 167, member B	Fam167b	1.96985	0.613513	4.04708e-06	0.000170623	False
288025	HRAS-like suppressor	Hrasls	-0.968126	4.81417	4.07768e-06	0.000171292	False
85247	S100 calcium binding protein A6	S100a6	0.881784	6.6018	4.12644e-06	0.000172717	False
114705	regulator of G-protein signaling 14	Rgs14	1.6649	1.87135	4.36618e-06	0.00018186	False
366957	Rac family small GTPase 2	Rac2	1.88702	4.67485	4.37615e-06	0.00018186	False
366894	thyrotropin-releasing hormone degrading enzyme	Trhde	2.40108	1.315	4.41082e-06	0.000182002	False
362430	C-type lectin domain family 4, member A1	Clec4a1	1.45879	4.0917	4.42085e-06	0.000182002	False
301013	shisa family member 5	Shisa5	1.03612	5.51406	4.42648e-06	0.000182002	False
688047	lysozyme C type 2	Lyc2	1.71231	0.713875	4.45484e-06	0.000182523	False
25528	signal-regulatory protein alpha	Sirpa	1.33459	5.60006	4.51288e-06	0.000184252	False
307126	minichromosome maintenance 10 replication initiation factor	Mcm10	2.15006	0.76137	4.55177e-06	0.00018519	False
365583	dermatan sulfate epimerase	Dse	0.872032	4.68633	4.66551e-06	0.000189156	False
246334	tumor protein p63	Tp63	-1.08398	4.19011	4.70578e-06	0.000190126	False
25084	interleukin 4 receptor	Il4r	1.31985	6.20924	4.73867e-06	0.000190793	False
100909761	myotilin-like	LOC100909761	-0.869738	5.4232	4.84954e-06	0.000194584	False
171081	colony stimulating factor 2 receptor beta common subunit	Csf2rb	1.93747	4.72769	4.98691e-06	0.000199184	False
364900	cap binding complex dependent translation initiation factor	Ctif	0.865815	4.36991	4.99842e-06	0.000199184	False
54321	calponin 3	Cnn3	0.781699	5.88902	5.03381e-06	0.000199909	False
291180	ependymin related 1	Epdr1	-0.854599	6.18591	5.2807e-06	0.000209001	False
63845	transmembrane protein with EGF-like and two follistatin-like domains 1	Tmeff1	2.52225	2.31703	5.37177e-06	0.000211885	False
316035	CKLF-like MARVEL transmembrane domain containing 6	Cmtm6	1.2816	5.39262	5.44265e-06	0.00021367	False
499413	heat shock transcription factor 2 binding protein	Hsf2bp	2.20952	0.0436759	5.45375e-06	0.00021367	False
140666	regulator of calcineurin 2	Rcan2	-0.767832	5.07449	5.49599e-06	0.000214602	False
362966	NFAT activating protein with ITAM motif 1	Nfam1	1.92575	3.89596	5.57685e-06	0.000217031	False
171553	alpha 1,3-galactosyltransferase 2	A3galt2	1.67962	3.85133	5.6728e-06	0.00021953	False
24184	adenylate kinase 2	Ak2	1.16467	4.94715	5.67881e-06	0.00021953	False
311730	G protein-coupled receptor 155	Gpr155	-0.959405	6.27827	5.74663e-06	0.000220993	False
499839	similar to LOC387763 protein	RGD1564664	1.69657	4.63244	5.75463e-06	0.000220993	False
361673	interferon induced transmembrane protein 3	Ifitm3	1.22491	7.27375	5.87378e-06	0.000224827	False
245708	guanylate cyclase 2G	Gucy2g	-1.53327	1.74569	6.01822e-06	0.0002296	False
24627	phosphodiesterase 4D	Pde4d	-0.827621	5.36053	6.22658e-06	0.000236773	False
502902	C-type lectin domain containing 7A	Clec7a	2.66576	2.69101	6.35752e-06	0.000240964	True
362653	chymotrypsin C	Ctrc	1.80591	0.115524	6.41443e-06	0.000242332	False
304645	TBC1 domain family member 9	Tbc1d9	1.4543	2.04035	6.57978e-06	0.000247683	False
25155	spleen associated tyrosine kinase	Syk	1.40311	3.48803	6.59864e-06	0.000247683	False
83628	Cd82 molecule	Cd82	1.29841	4.33116	6.65929e-06	0.000249156	False
50938	cell adhesion associated, oncogene regulated	Cdon	0.808953	4.75095	6.71461e-06	0.000250421	False
114709	interferon induced transmembrane protein 2	Ifitm2	0.987677	6.36148	6.76966e-06	0.000251667	False
296409	Cas scaffolding protein family member 4	Cass4	1.60492	1.27159	6.85069e-06	0.0002538	False
246240	receptor-interacting serine-threonine kinase 3	Ripk3	2.31332	2.97039	6.87067e-06	0.0002538	False
309106	single Ig and TIR domain containing	Sigirr	1.80668	1.74299	6.92161e-06	0.000254198	False
680076	ankyrin repeat and SOCS box-containing 14	Asb14	-0.810711	5.17727	6.92513e-06	0.000254198	False
300228	LIM domain and actin binding 1	Lima1	0.809268	5.3598	7.2642e-06	0.000265806	False
314618	Rho GTPase activating protein 45	Arhgap45	1.52615	4.01152	7.40501e-06	0.000270109	False
287813	immunoglobulin superfamily, member 7	Igsf7	2.55137	4.15795	7.44003e-06	0.000270538	False
29497	polypyrimidine tract binding protein 1	Ptbp1	0.958626	6.01417	7.63258e-06	0.000276675	False
25692	plasminogen activator, tissue type	Plat	1.46591	5.65401	7.82314e-06	0.000282338	False
498206	TNF receptor superfamily member 11A	Tnfrsf11a	1.42248	1.98461	7.83733e-06	0.000282338	False
360655	Cd300 molecule-like family member E	Cd300le	1.81229	3.71355	7.88506e-06	0.000283181	False
25066	poliovirus receptor	PVR	1.25881	5.79797	8.17313e-06	0.000292511	False
245978	chemokine-like factor	Cklf	1.92868	0.52478	8.19513e-06	0.000292511	False
679819	GLI pathogenesis-related 2	Glipr2	1.99985	2.14686	8.28645e-06	0.000294866	False
114113	platelet-activating factor acetylhydrolase 1b, catalytic subunit 3	Pafah1b3	1.60873	1.13292	8.31643e-06	0.00029503	False
192235	hypoxia up-regulated 1	Hyou1	0.972191	6.314	8.82872e-06	0.000312252	False
317219	P2Y receptor family member 10	P2ry10	1.87226	0.406792	8.86825e-06	0.0003127	False
690743	mixed lineage kinase domain like pseudokinase	Mlkl	1.19981	3.18333	9.2689e-06	0.00032584	False
29415	sphingosine-1-phosphate receptor 2	S1pr2	0.914574	3.93899	9.63657e-06	0.000337745	False
315610	junction adhesion molecule like	Jaml	2.29357	2.08138	9.88235e-06	0.000345319	False
65206	potassium calcium-activated channel subfamily N member 4	Kcnn4	2.73995	2.20945	1.00195e-05	0.000349062	True
309526	interferon-induced protein with tetratricopeptide repeats 3	Ifit3	1.10901	3.74686	1.00651e-05	0.000349604	False
170637	SAM domain, SH3 domain and nuclear localization signals, 1	Samsn1	2.42293	2.0793	1.02265e-05	0.000353818	False
170943	solute carrier family 25 member 10	Slc25a10	2.32398	3.78065	1.02472e-05	0.000353818	False
313776	PPARGC1 and ESRR induced regulator, muscle 1	Perm1	-1.01162	4.71118	1.03249e-05	0.000355444	False
171516	aldo-keto reductase family 1, member C3	Akr1c3	1.54718	0.724428	1.0447e-05	0.000358588	False
680466	phospholipid phosphatase 5	Plpp5	1.13255	3.59172	1.05908e-05	0.000362455	False
503446	ankyrin repeat and SOCS box-containing 12	Asb12	-0.775983	6.39496	1.07944e-05	0.000368339	False
81771	ribosomal protein S6 kinase A1	Rps6ka1	1.19596	3.06168	1.09575e-05	0.000372811	False
29222	prothymosin alpha	Ptma	1.13021	7.30105	1.10331e-05	0.000373746	False
298784	NLR family, CARD domain containing 4	Nlrc4	2.08921	0.295288	1.10492e-05	0.000373746	False
497931	phosphoinositide-3-kinase, regulatory subunit 5	Pik3r5	2.03484	2.36624	1.11024e-05	0.000373767	False
316736	elastin microfibril interfacer 2	Emilin2	1.00117	3.85231	1.11141e-05	0.000373767	False
25062	glycerol-3-phosphate dehydrogenase 2	Gpd2	-0.764058	5.89989	1.13033e-05	0.000379036	False
246208	interferon gamma inducible protein 47	Ifi47	1.66709	4.43885	1.14025e-05	0.000379865	False
306357	Gem-interacting protein	Gmip	1.29151	2.86225	1.14039e-05	0.000379865	False
84007	complement C3a receptor 1	C3ar1	1.7222	2.27004	1.1426e-05	0.000379865	False
24498	interleukin 6	Il6	3.25117	4.04647	1.16631e-05	0.000386642	True
293698	coiled-coil domain containing 88B	Ccdc88b	1.49073	1.97445	1.21614e-05	0.000402019	False
307839	zinc finger protein 612	Zfp612	-0.748939	4.87341	1.25053e-05	0.000412213	False
25150	FYN proto-oncogene, Src family tyrosine kinase	Fyn	1.03216	5.39919	1.26387e-05	0.000415435	False
100910940	ecotropic viral integration site 2B	Evi2b	1.41131	2.77996	1.27085e-05	0.000416553	False
300732	proline-serine-threonine phosphatase-interacting protein 1	Pstpip1	1.7924	3.50525	1.31031e-05	0.00042828	False
450223	C-type lectin domain family 4, member E	Clec4e	2.24844	2.41194	1.33394e-05	0.000434781	False
361735	membrane spanning 4-domains A6A	Ms4a6a	1.88053	4.15682	1.43108e-05	0.000465142	False
365042	RAB32, member RAS oncogene family	Rab32	1.34453	3.78948	1.46784e-05	0.000475761	False
315265	twinfilin actin-binding protein 1	Twf1	1.02386	4.88257	1.52175e-05	0.000491864	False
305472	phosphoinositide-3-kinase interacting protein 1	Pik3ip1	-0.818273	6.20131	1.53904e-05	0.000495612	False
303163	interferon gamma induced GTPase	Igtp	1.29104	4.50899	1.54187e-05	0.000495612	False
25643	G protein subunit alpha i3	Gnai3	0.771981	5.88907	1.55678e-05	0.000499027	False
301265	phospholipase A2 group VII	Pla2g7	2.60051	3.31752	1.5673e-05	0.000501018	False
408246	complement C1r subcomponent like	C1rl	1.60041	2.53447	1.58225e-05	0.000504411	False
317258	integrin subunit beta 1 binding protein 2	Itgb1bp2	-1.07963	3.20449	1.61267e-05	0.000512705	False
293186	lymphatic vessel endothelial hyaluronan receptor 1	Lyve1	0.867024	6.09359	1.62058e-05	0.000513816	False
313563	exonuclease 5	Exo5	1.39019	2.59756	1.63763e-05	0.00051781	False
81641	alanyl aminopeptidase, membrane	Anpep	1.1784	6.61701	1.65245e-05	0.00052108	False
360757	mesenteric estrogen-dependent adipogenesis	Medag	1.15247	5.25818	1.67438e-05	0.00052657	False
29316	adenosine A2B receptor	Adora2b	2.10344	1.82875	1.72349e-05	0.000540554	False
299138	SIX homeobox 4	Six4	-0.747741	6.18525	1.73179e-05	0.000541697	False
297584	C-type lectin domain family 4, member A2	Clec4a2	3.38324	1.43105	1.77194e-05	0.00055277	True
310695	kirre like nephrin family adhesion molecule 1	Kirrel1	0.982427	5.07177	1.83131e-05	0.000569761	False
25458	glutathione synthetase	Gss	1.28079	3.99618	1.90237e-05	0.000590292	False
25314	epithelial membrane protein 1	Emp1	0.940822	6.61147	1.96214e-05	0.000607219	False
24392	gap junction protein, alpha 1	Gja1	1.00101	6.37647	1.96928e-05	0.000607812	False
29237	proenkephalin	Penk	2.03456	0.840879	1.97825e-05	0.000608233	False
307171	amyloid beta precursor protein binding family B member 1 interacting protein	Apbb1ip	1.02596	3.74511	1.9811e-05	0.000608233	False
303330	transmembrane protein 97	Tmem97	1.19933	2.91988	1.98637e-05	0.000608246	False
297893	histone deacetylase 1	Hdac1	0.876139	5.03876	1.99922e-05	0.000610574	False
360518	glutamine-fructose-6-phosphate transaminase 2	Gfpt2	1.24923	6.49342	2.00709e-05	0.000611374	False
315579	ubiquitin associated and SH3 domain containing, B	Ubash3b	1.20405	2.77323	2.06179e-05	0.000626396	False
306886	receptor interacting serine/threonine kinase 1	Ripk1	0.886132	4.31461	2.06743e-05	0.000626475	False
24852	tropomyosin 4	Tpm4	0.978173	5.75375	2.11621e-05	0.000637446	False
100134871	beta globin minor gene	LOC100134871	1.1514	5.86541	2.11762e-05	0.000637446	False
362893	Rho GTPase activating protein 9	Arhgap9	1.6019	3.40337	2.12684e-05	0.000637446	False
260416	calcium regulated heat stable protein 1	Carhsp1	1.12164	5.10303	2.12821e-05	0.000637446	False
64367	peptidylprolyl isomerase B	Ppib	0.792778	6.49512	2.13103e-05	0.000637446	False
299339	TNF alpha induced protein 2	Tnfaip2	0.977952	4.45666	2.14389e-05	0.000639649	False
89787	LDL receptor related protein 3	Lrp3	2.86858	2.81965	2.15881e-05	0.00064196	True
289392	plexin A2	Plxna2	0.980023	3.98995	2.16456e-05	0.00064196	False
313033	XK related 8	Xkr8	1.23578	1.87091	2.16819e-05	0.00064196	False
24546	solute carrier organic anion transporter family, member 2a1	Slco2a1	2.68811	4.68871	2.21716e-05	0.000654794	False
117542	BAI1-associated protein 2	Baiap2	1.26619	2.24002	2.26704e-05	0.000667831	False
364206	pleckstrin	Plek	1.38494	3.34266	2.33307e-05	0.000685544	False
25055	lipase A, lysosomal acid type	Lipa	0.9332	5.33325	2.35905e-05	0.000691433	False
286926	tissue factor pathway inhibitor 2	Tfpi2	2.3858	3.35395	2.4155e-05	0.000706199	False
24974	RT1 class Ia, locus A2	RT1-A2	1.00002	4.93562	2.43236e-05	0.000709347	False
304549	2'-5' oligoadenylate synthetase-like 2	Oasl2	1.19609	3.34623	2.44052e-05	0.000709947	False
25638	phosphodiesterase 4A	Pde4a	-1.07447	3.07304	2.45008e-05	0.000710362	False
685045	ABRA C-terminal like	Abracl	1.58217	3.69445	2.45416e-05	0.000710362	False
24517	JunB proto-oncogene, AP-1 transcription factor subunit	Junb	0.963013	6.37398	2.50068e-05	0.000722033	False
117185	neuraminidase 3	Neu3	-1.22244	2.95885	2.52201e-05	0.00072639	False
304317	archaelysin family metallopeptidase 1	Amz1	1.43903	1.43593	2.53249e-05	0.000727606	False
362432	C-type lectin domain family 4, member D	Clec4d	2.96517	3.85935	2.54612e-05	0.00072972	True
309607	RT1 class I, locus CE5	RT1-CE5	1.03041	3.25204	2.57511e-05	0.000736217	False
680308	methylenetetrahydrofolate dehydrogenase (NADP+ dependent) 2, methenyltetrahydrofolate cyclohydrolase	Mthfd2	1.65271	1.79568	2.58751e-05	0.000737949	False
85254	solute carrier family 44 member 1	Slc44a1	0.848177	5.88948	2.60251e-05	0.000740412	False
691141	hypothetical protein LOC691141	LOC691141	2.89311	2.50842	2.67689e-05	0.000759715	False
84013	hydroxysteroid (17-beta) dehydrogenase 12	Hsd17b12	2.16537	5.71206	2.68826e-05	0.000760681	False
25603	myristoylated alanine rich protein kinase C substrate	Marcks	0.821996	5.66715	2.69337e-05	0.000760681	False
50672	endothelin receptor type B	Ednrb	1.39737	2.54293	2.72943e-05	0.000769	False
113959	complement C5a receptor 1	C5ar1	2.13423	4.54447	2.75161e-05	0.000771638	False
191575	NME/NM23 nucleoside diphosphate kinase 1	Nme1	1.26274	3.24965	2.75206e-05	0.000771638	False
361493	leukocyte immunoglobulin-like receptor, subfamily B (with TM and ITIM domains), member 3-like	Lilrb3l	1.48468	2.81918	2.77043e-05	0.000774923	False
311129	oxysterol binding protein-like 6	Osbpl6	-0.718825	5.40299	2.81147e-05	0.000784516	False
252929	cathepsin Z	Ctsz	1.53332	5.43806	2.82068e-05	0.000785202	False
54259	inositol polyphosphate-5-phosphatase D	Inpp5d	1.39634	3.39073	2.91095e-05	0.000808396	False
155151	coronin 1A	Coro1a	2.35898	4.83285	2.95555e-05	0.000818827	False
25467	insulin receptor substrate 1	Irs1	-0.833195	4.72896	2.97937e-05	0.000823466	False
116689	protein tyrosine phosphatase, non-receptor type 6	Ptpn6	1.37673	3.95969	2.98943e-05	0.00082429	False
24230	translocator protein	Tspo	1.39587	5.31836	2.99799e-05	0.000824696	False
100359680	lysophosphatidylcholine acyltransferase 2	Lpcat2	1.34523	2.79383	3.00861e-05	0.000825177	False
311984	gamma-secretase activating protein	Gsap	0.982636	3.32102	3.01393e-05	0.000825177	False
81822	actin, beta	Actb	1.38638	9.46936	3.06868e-05	0.000838197	False
690845	ribosomal protein S4, Y-linked 2	Rps4y2	1.3689	1.21572	3.09807e-05	0.000844243	False
360918	platelet factor 4	Pf4	1.04411	3.3778	3.10992e-05	0.000845492	False
310508	beta-1,3-N-acetylgalactosaminyltransferase 1 (globoside blood group)	B3galnt1	1.05534	3.70959	3.1278e-05	0.00084837	False
301059	myeloid differentiation primary response 88	Myd88	1.25936	5.17195	3.13859e-05	0.000849317	False
25402	caspase 3	Casp3	0.901008	4.08743	3.22917e-05	0.000871801	False
24494	interleukin 1 beta	Il1b	3.51209	3.62037	3.26246e-05	0.00087875	True
500050	ankyrin repeat and SOCS box containing 15	Asb15	-1.22161	2.89859	3.28445e-05	0.00088263	False
171056	C-X3-C motif chemokine receptor 1	Cx3cr1	2.11011	0.164966	3.35839e-05	0.00090042	False
300455	BMP-binding endothelial regulator	Bmper	1.44299	2.41794	3.38564e-05	0.00090564	False
29744	semaphorin 6C	Sema6c	-0.737271	4.82818	3.44535e-05	0.000919497	False
362978	cysteine-rich with EGF-like domains 2	Creld2	1.41753	4.50185	3.4793e-05	0.000924671	False
361602	malic enzyme 3	Me3	-0.711608	5.60408	3.48063e-05	0.000924671	False
25741	phosphofructokinase, liver type	Pfkl	1.25009	4.47897	3.50248e-05	0.000928357	False
307919	snail family transcriptional repressor 3	Snai3	-1.11517	3.16544	3.62578e-05	0.000958854	False
29738	potassium voltage-gated channel subfamily A regulatory beta subunit 2	Kcnab2	1.47463	0.762258	3.67402e-05	0.000967735	False
25383	apolipoprotein B mRNA editing enzyme catalytic subunit 1	Apobec1	1.40884	2.52155	3.676e-05	0.000967735	False
309186	fermitin family member 3	Fermt3	1.81186	4.31516	3.72079e-05	0.000976845	False
308864	FCH and double SH3 domains 2	Fchsd2	1.00258	3.44387	3.73564e-05	0.000976845	False
94273	mannosyl (alpha-1,6-)-glycoprotein beta-1,2-N-acetylglucosaminyltransferase	Mgat2	0.837638	4.14312	3.73579e-05	0.000976845	False
366988	bridging integrator 2	Bin2	1.68225	2.43923	3.76698e-05	0.000982794	False
25211	lysozyme 2	Lyz2	2.1454	8.7118	3.78235e-05	0.000984595	False
296197	destrin-like 1	Dstnl1	0.739469	5.65892	3.79826e-05	0.00098653	False
498873	similar to cDNA sequence BC023105	MGC105567	1.52309	0.671161	3.8088e-05	0.000987064	False
311169	reticulon 4 receptor-like 2	Rtn4rl2	1.69563	0.0565656	3.85191e-05	0.000996019	False
308779	fibronectin type III and SPRY domain containing 2	Fsd2	-1.41883	3.85444	3.89689e-05	0.00100541	False
498282	Rho GTPase activating protein 30	Arhgap30	1.70338	3.2039	3.95947e-05	0.0010193	False
292999	chondroitin sulfate synthase 1	Chsy1	1.04282	3.75072	3.9732e-05	0.00101966	False
291135	acyl-CoA thioesterase 13	Acot13	-0.773494	4.39217	3.97841e-05	0.00101966	False
25041	purinergic receptor P2X 6	P2rx6	-1.03361	3.34301	3.99584e-05	0.00102188	False
25587	inhibitor of DNA binding 2	Id2	1.1792	3.60841	4.02431e-05	0.00102691	False
308958	cerebellar degeneration-related protein 2	Cdr2	1.36285	2.532	4.04233e-05	0.00102925	False
289237	SLAM family member 8	Slamf8	1.35168	2.24789	4.05526e-05	0.00103028	False
373540	interleukin 18 receptor accessory protein	Il18rap	1.66895	1.07221	4.09594e-05	0.00103835	False
58949	platelet-activating factor receptor	Ptafr	1.46312	3.67599	4.13441e-05	0.00104583	False
140868	fatty acid binding protein 5	Fabp5	1.81773	4.91013	4.15922e-05	0.00104982	False
315879	ADAM metallopeptidase with thrombospondin type 1 motif, 7	Adamts7	1.41285	2.81128	4.17769e-05	0.0010522	False
292537	osteoclast associated, immunoglobulin-like receptor	Oscar	3.89633	1.29073	4.19978e-05	0.00105548	True
300067	SH3-domain binding protein 1	Sh3bp1	1.11618	2.52456	4.21425e-05	0.00105683	False
498066	SH3 domain binding glutamate-rich protein	Sh3bgr	-0.737831	6.51717	4.32393e-05	0.00108201	False
266807	dual oxidase 1	Duox1	1.64099	2.85077	4.34429e-05	0.00108477	False
59264	leukotriene B4 receptor	Ltb4r	2.65565	0.95072	4.4443e-05	0.00110736	False
313125	BTB domain and CNC homolog 2	Bach2	-1.3489	1.15623	4.48673e-05	0.00111555	False
289276	adenylosuccinate synthase	Adss	0.716174	5.29005	4.65624e-05	0.00115522	False
50677	protein tyrosine phosphatase, receptor type, O	Ptpro	1.62233	3.38505	4.66739e-05	0.00115553	False
310630	semaphorin 4A	Sema4a	1.41902	2.86457	4.75875e-05	0.00117564	False
60379	collagen type V alpha 3 chain	Col5a3	0.823314	4.83231	4.92341e-05	0.00121375	False
295264	MLLT11, transcription factor 7 cofactor	Mllt11	-1.16418	6.73274	4.97569e-05	0.00122404	False
25156	vav guanine nucleotide exchange factor 1	Vav1	1.67964	1.9724	5.03234e-05	0.00123536	False
366998	nuclear factor, erythroid 2	Nfe2	2.33705	1.08808	5.06807e-05	0.00123922	False
84416	small muscle protein, X-linked	Smpx	-0.794339	6.72945	5.06934e-05	0.00123922	False
103689965	complement C4-like	LOC103689965	1.11065	6.41307	5.12493e-05	0.00124674	False
361003	dual specificity phosphatase and pro isomerase domain containing 1	Dupd1	-1.1423	2.28121	5.127e-05	0.00124674	False
293624	interferon regulatory factor 7	Irf7	0.912127	3.95034	5.13223e-05	0.00124674	False
288077	hematopoietic cell specific Lyn substrate 1	Hcls1	1.62663	4.32082	5.22668e-05	0.00126703	False
289235	SLAM family member 9	Slamf9	1.54731	0.617402	5.3321e-05	0.00128798	False
309772	vestigial-like family member 2	Vgll2	-0.775384	6.26205	5.33524e-05	0.00128798	False
304005	NFKB inhibitor zeta	Nfkbiz	1.46758	3.97041	5.35536e-05	0.00129017	False
499014	zinc finger, DHHC-type containing 14	Zdhhc14	1.19616	2.28088	5.36808e-05	0.00129056	False
301570	SP110 nuclear body protein	Sp110	0.897123	3.97539	5.47489e-05	0.00131352	False
89788	G protein subunit alpha 15	Gna15	1.62277	2.08287	5.58011e-05	0.00133601	False
499431	collagen type XIII alpha 1 chain	Col13a1	1.90193	0.171796	5.60291e-05	0.00133717	False
59107	latent transforming growth factor beta binding protein 1	Ltbp1	0.785002	6.52534	5.60792e-05	0.00133717	False
308918	PPFIA binding protein 2	Ppfibp2	-0.868835	5.09399	5.67125e-05	0.00134862	False
300236	small cell adhesion glycoprotein	Smagp	1.40349	2.5001	5.68897e-05	0.00134862	False
289785	myosin IG	Myo1g	2.11502	2.99512	5.69074e-05	0.00134862	False
683720	keratin 79	Krt79	3.46348	0.468769	5.79336e-05	0.00136953	True
24585	myosin light chain 3	Myl3	-1.08846	7.94489	5.80251e-05	0.00136953	False
313101	F-box and leucine-rich repeat protein 4	Fbxl4	-0.96599	6.4341	5.96461e-05	0.00140494	False
25688	chloride voltage-gated channel 1	Clcn1	-0.833677	4.65769	6.02033e-05	0.0014152	False
361054	emopamil binding protein-like	Ebpl	1.37057	2.81231	6.08853e-05	0.00142835	False
308836	potassium channel tetramerization domain containing 14	Kctd14	1.45451	1.68253	6.10939e-05	0.00143036	False
311642	sulfatase 2	Sulf2	0.731491	5.53548	6.18952e-05	0.00144621	False
113931	paired related homeobox 2	Prrx2	1.48356	1.7429	6.25281e-05	0.00145807	False
29387	phospholipase A2, group IIC	Pla2g2c	-1.67175	3.75897e-05	6.27532e-05	0.00146	False
24771	syndecan 4	Sdc4	0.878705	6.99647	6.28618e-05	0.00146	False
289419	NUAK family kinase 2	Nuak2	1.73915	1.71153	6.36787e-05	0.00147579	False
363984	inhibitor of nuclear factor kappa B kinase subunit epsilon	Ikbke	1.15072	3.33741	6.37955e-05	0.00147579	False
313582	four and a half LIM domains 3	Fhl3	-0.76368	6.48599	6.5533e-05	0.00151298	False
78975	protein kinase AMP-activated catalytic subunit alpha 2	Prkaa2	-0.704043	4.95453	6.5856e-05	0.00151743	False
361790	protein phosphatase 1, regulatory subunit 18	Ppp1r18	0.880802	4.41599	6.6148e-05	0.00152114	False
306760	docking protein 3	Dok3	2.04081	2.07037	6.86357e-05	0.00157524	False
171499	cytokine receptor-like factor 2	Crlf2	1.31154	2.11703	6.87773e-05	0.00157538	False
360848	shisa family member 4	Shisa4	-0.759613	6.55622	6.89955e-05	0.00157727	False
81750	protein S	Pros1	0.980791	5.29786	7.14186e-05	0.00162947	False
301711	leucine rich repeat containing 30	Lrrc30	-1.29529	6.22896	7.17348e-05	0.00163029	False
79131	fatty acid binding protein 3	Fabp3	-1.11779	7.41268	7.17349e-05	0.00163029	False
499470	armadillo repeat containing 2	Armc2	-1.12401	3.01934	7.22005e-05	0.00163767	False
117539	interleukin 10 receptor subunit alpha	Il10ra	1.50558	1.20571	7.31974e-05	0.00165705	False
294706	CD180 molecule	Cd180	2.0086	1.10808	7.34533e-05	0.00165962	False
114491	Cbp/p300-interacting transactivator, with Glu/Asp-rich carboxy-terminal domain, 4	Cited4	-0.977928	4.64898	7.43973e-05	0.00167769	False
59076	G protein-coupled receptor kinase 6	Grk6	0.891469	4.52677	7.47835e-05	0.00168313	False
304816	leiomodin 1	Lmod1	-0.782836	4.41734	7.51365e-05	0.00168782	False
171160	HOP homeobox	Hopx	1.29099	3.65303	7.68716e-05	0.00172119	False
171447	adhesion G protein-coupled receptor L2	Adgrl2	0.884353	3.74889	7.69183e-05	0.00172119	False
362918	MTSS1, I-BAR domain containing	Mtss1	0.989539	5.56176	7.72484e-05	0.00172526	False
314654	myosin IF	Myo1f	1.35852	3.92963	7.78658e-05	0.00173572	False
289211	Fc fragment of IgG receptor IIb	Fcgr2b	1.97233	4.77596	7.83976e-05	0.00173845	False
24642	phosphoglycerate mutase 1	Pgam1	1.02823	6.72298	7.84214e-05	0.00173845	False
414792	RT1 class I, locus CE10	RT1-CE10	0.981827	3.97656	7.84363e-05	0.00173845	False
362848	PML-RARA regulated adaptor molecule 1	Pram1	2.96244	1.74333	7.92054e-05	0.00175216	False
287876	actin, gamma 1	Actg1	1.20091	6.68404	8.01667e-05	0.00177006	False
315936	zinc finger and BTB domain containing 38	Zbtb38	-0.712029	5.12476	8.03502e-05	0.00177075	False
296953	interferon regulatory factor 5	Irf5	1.84238	3.3077	8.17612e-05	0.00179844	False
500874	transmembrane protein 65	Tmem65	-0.919922	3.90127	8.22981e-05	0.00180683	False
296259	acyl-CoA synthetase short-chain family member 1	Acss1	-0.80259	6.27797	8.26215e-05	0.00181052	False
296973	bisphosphoglycerate mutase	Bpgm	-0.66345	5.33616	8.29411e-05	0.0018141	False
25734	HCK proto-oncogene, Src family tyrosine kinase	Hck	1.94079	3.31299	8.33189e-05	0.00181895	False
29560	hypoxia inducible factor 1 alpha subunit	Hif1a	1.03096	6.16383	8.49308e-05	0.00185066	False
24375	alpha-L-fucosidase 1	Fuca1	0.756092	5.04361	8.70252e-05	0.00188836	False
26203	NADH dehydrogenase subunit 6	ND6	-0.846238	5.64524	8.71017e-05	0.00188836	False
316214	transcription factor EB	Tfeb	-0.699906	5.54692	8.71556e-05	0.00188836	False
81756	RAB13, member RAS oncogene family	Rab13	1.21747	3.61537	8.73097e-05	0.00188836	False
314480	G protein-coupled receptor 132	Gpr132	1.51178	0.479039	8.82206e-05	0.00190452	False
25357	thyroid hormone responsive	Thrsp	2.56457	7.24172	9.0023e-05	0.00193581	False
292072	adenine phosphoribosyl transferase	Aprt	0.993712	5.61668	9.00915e-05	0.00193581	False
501570	similar to chromosome X open reading frame 21	RGD1565785	1.96999	-0.232964	9.01694e-05	0.00193581	False
287562	chemokine (C-C motif) ligand 12	Ccl12	2.00843	0.379072	9.11932e-05	0.00195419	False
498796	family with sequence similarity 107, member B	Fam107b	1.05066	3.52571	9.33081e-05	0.00199511	False
685174	canopy FGF signaling regulator 3	Cnpy3	0.755596	4.41295	9.34458e-05	0.00199511	False
114091	ficolin B	Fcnb	3.72334	3.22558	9.38511e-05	0.00200009	True
306687	major facilitator superfamily domain containing 14B	Mfsd14b	0.862466	4.53978	9.45076e-05	0.0020104	False
83785	vascular endothelial growth factor A	Vegfa	1.05745	6.92399	9.48967e-05	0.002015	False
65164	HtrA serine peptidase 1	Htra1	0.682273	6.49862	9.56163e-05	0.00202658	False
363016	similar to RIKEN cDNA 4931406C07	RGD1309534	1.27456	3.37717	9.86813e-05	0.00208774	False
317468	toll-like receptor 7	Tlr7	1.39377	2.8392	0.000100653	0.0021256	False
59103	prostaglandin E synthase	Ptges	1.43314	2.31167	0.000101293	0.00213139	False
311047	cytohesin 1 interacting protein	Cytip	1.56941	2.75993	0.000101294	0.00213139	False
24377	glucose-6-phosphate dehydrogenase	G6pd	1.07565	5.02136	0.000101631	0.00213461	False
64569	leukocyte specific transcript 1	Lst1	2.74137	1.28213	0.000102348	0.00214581	False
54242	carboxypeptidase A3	Cpa3	0.847027	4.72253	0.000102998	0.00215555	False
315496	dpy-19 like C-mannosyltransferase 1	Dpy19l1	0.674539	5.2129	0.000103843	0.00216932	False
301562	collagen type IV alpha 4 chain	Col4a4	-0.776587	5.07577	0.000106412	0.00221902	False
24973	RT1 class Ia, locus A1	RT1-A1	0.69711	4.58754	0.000106959	0.00222643	False
25694	hyaluronan synthase 2	Has2	1.93452	1.13867	0.000107388	0.00223136	False
84387	peptidoglycan recognition protein 1	Pglyrp1	1.61024	0.43504	0.00010805	0.00224111	False
314996	kelch-like family member 38	Klhl38	-0.926782	6.68843	0.0001087	0.00225059	False
361689	unc-93 homolog B1, TLR signaling regulator	Unc93b1	1.20283	4.68261	0.000109172	0.00225635	False
24231	complement C2	C2	0.957531	3.20815	0.000109817	0.00226566	False
295704	ubiquitin-conjugating enzyme E2L 6	Ube2l6	1.11727	2.23514	0.000111369	0.00229178	False
116654	exocyst complex component 4	Exoc4	-0.692178	5.04405	0.000111477	0.00229178	False
294281	solute carrier family 39 member 7	Slc39a7	0.651949	5.50251	0.000112238	0.00230335	False
311167	smoothelin-like 1	Smtnl1	-0.972955	8.09338	0.000112628	0.00230729	False
311952	polypeptide N-acetylgalactosaminyltransferase 11	Galnt11	-1.01756	7.15649	0.000113344	0.00231787	False
361276	cerebral dopamine neurotrophic factor	Cdnf	-0.720451	5.0147	0.000114428	0.00233595	False
500906	cytohesin 4	Cyth4	1.53913	4.00916	0.000116064	0.00236483	False
171109	dual specificity phosphatase 5	Dusp5	1.26755	1.81193	0.00011625	0.00236483	False
292155	heparan sulfate 2-O-sulfotransferase 1	Hs2st1	0.860051	4.78737	0.000116654	0.00236891	False
290558	5'-nucleotidase domain containing 2	Nt5dc2	1.85862	1.92626	0.000118152	0.00239143	False
246273	tribbles pseudokinase 3	Trib3	1.91389	1.43142	0.000118174	0.00239143	False
25060	hexokinase 3	Hk3	3.50134	1.29234	0.000119306	0.00240876	False
29157	cyclin G2	Ccng2	-0.672534	6.20421	0.000119444	0.00240876	False
60445	TSC complex subunit 1	Tsc1	-0.730877	5.17635	0.000119802	0.00240897	False
361597	FES proto-oncogene, tyrosine kinase	Fes	1.28317	3.41018	0.000119869	0.00240897	False
287805	G protein-coupled receptor, class C, group 5, member C	Gprc5c	0.68149	5.14083	0.000121024	0.002428	False
311502	kizuna centrosomal protein	Kiz	-0.782162	4.23129	0.000121893	0.00244123	False
363169	T cell activation inhibitor, mitochondrial	Tcaim	-0.71337	5.62109	0.000123682	0.00247101	False
56782	serglycin	Srgn	1.74857	5.20433	0.000123805	0.00247101	False
83825	doublecortin-like kinase 1	Dclk1	0.944659	3.5955	0.000126328	0.00251704	False
57301	C-C motif chemokine receptor 1	Ccr1	1.86679	2.60144	0.000127329	0.00253264	False
117533	guanosine monophosphate reductase	Gmpr	-0.710142	6.62412	0.000128512	0.00254861	False
29469	lipopolysaccharide binding protein	Lbp	1.5718	5.55554	0.00012857	0.00254861	False
290692	kelch-like family member 2	Klhl2	1.1083	3.74497	0.000129766	0.00256795	False
362833	MOB kinase activator 3A	Mob3a	0.997572	3.86869	0.000131717	0.00260214	False
24654	phospholipase C beta 1	Plcb1	1.43215	1.94152	0.000133728	0.00263738	False
24508	interferon regulatory factor 1	Irf1	0.911981	4.50199	0.00013421	0.00264242	False
294900	tumor protein D52	Tpd52	0.810145	4.0408	0.000134445	0.00264258	False
25507	proprotein convertase subtilisin/kexin type 6	Pcsk6	0.662683	4.914	0.000136179	0.00267214	False
313370	hook microtubule-tethering protein 1	Hook1	1.34692	1.67484	0.000137065	0.002685	False
362625	mannosidase, alpha, class 1C, member 1	Man1c1	0.875263	3.77639	0.000141621	0.00276958	False
414793	RT1 class I, locus CE3	RT1-CE3	1.17546	1.29711	0.00014216	0.00277546	False
360161	NIMA-related kinase 6	Nek6	1.61409	4.014	0.000142835	0.00278397	False
81778	S100 calcium binding protein A10	S100a10	0.766108	6.85132	0.000143353	0.00278598	False
83509	solute carrier family 7 member 7	Slc7a7	1.12622	2.52472	0.000143456	0.00278598	False
287122	ribosomal protein L3-like	Rpl3l	-0.775264	7.18811	0.000143657	0.00278598	False
83788	septin 9	2009-09-01	0.806736	4.20691	0.000144887	0.00280248	False
363165	cysteine and serine rich nuclear protein 1	Csrnp1	0.950408	3.50895	0.000145128	0.00280248	False
360681	nuclear prelamin A recognition factor	Narf	-0.659264	5.91924	0.00014523	0.00280248	False
81652	chitobiase	Ctbs	0.931577	4.05202	0.000145871	0.00281019	False
56813	parathyroid hormone 1 receptor	Pth1r	1.2118	2.65572	0.000146606	0.00281968	False
100362283	transmembrane protein 52	Tmem52	-0.770112	7.12904	0.000148972	0.00286046	False
317599	ATPase phospholipid transporting 11C	Atp11c	1.14553	1.67548	0.000149488	0.00286563	False
309696	BCR, RhoGEF and GTPase activating protein	Bcr	1.26345	3.03985	0.000149856	0.00286796	False
689257	adhesion G protein-coupled receptor D1	Adgrd1	1.36875	3.46563	0.000150333	0.00286992	False
684352	twinfilin actin-binding protein 2	Twf2	-0.700282	6.50602	0.000150452	0.00286992	False
116596	mitogen-activated protein kinase kinase kinase 8	Map3k8	1.07465	3.15226	0.000151095	0.00287467	False
81634	actinin, alpha 1	Actn1	0.722408	4.84459	0.000151412	0.00287467	False
93667	olfactomedin 1	Olfm1	1.64348	2.73007	0.000151441	0.00287467	False
260327	fibronectin type III domain containing 5	Fndc5	-0.906017	5.14525	0.000151878	0.00287826	False
60575	napsin A aspartic peptidase	Napsa	2.56151	3.09984	0.000152249	0.00288017	False
317379	MAGI family member, X-linked	Magix	-0.808321	3.94202	0.000152516	0.00288017	False
364396	ADP-ribosylation factor like GTPase 11	Arl11	1.08946	2.56892	0.000152721	0.00288017	False
501625	brain expressed, X-linked 1	Bex1	-0.713158	4.31387	0.000155427	0.00292297	False
29465	transient receptor potential cation channel, subfamily V, member 2	Trpv2	1.58719	2.04626	0.000155672	0.00292297	False
64316	sushi-repeat-containing protein, X-linked	Srpx	0.906481	5.29804	0.000155744	0.00292297	False
292763	mitogen activated protein kinase kinase kinase kinase 1	Map4k1	1.36465	2.46236	0.000158111	0.00296261	False
25380	annexin A1	Anxa1	1.10792	6.73831	0.000161385	0.0030191	False
306527	dual specificity phosphatase 26	Dusp26	-0.666087	6.37578	0.00016174	0.00302087	False
314979	DEP domain containing MTOR-interacting protein	Deptor	-0.941982	3.01957	0.000163901	0.00305633	False
302996	coiled-coil domain containing 78	Ccdc78	-1.34011	0.528822	0.000164539	0.00306333	False
155183	src kinase associated phosphoprotein 2	Skap2	1.33345	4.24799	0.000168566	0.00312929	False
24583	myosin heavy chain 3	Myh3	-0.901986	5.17605	0.00016862	0.00312929	False
313861	echinoderm microtubule associated protein like 4	Eml4	0.743821	4.14903	0.000169421	0.00313914	False
29618	BTG anti-proliferation factor 1	Btg1	1.09546	7.05369	0.00017063	0.00315652	False
60665	C-X-C motif chemokine ligand 6	Cxcl6	5.63156	2.74727	0.000171468	0.00316253	True
117264	pyrimidinergic receptor P2Y6	P2ry6	1.4496	2.19538	0.000171498	0.00316253	False
57302	cannabinoid receptor 2	Cnr2	1.51577	0.897739	0.000173385	0.00319225	False
25073	scavenger receptor class B, member 1	Scarb1	0.654186	4.99628	0.000173709	0.00319318	False
79426	zinc finger protein 36	Zfp36	0.815158	7.20866	0.000174488	0.00320244	False
54271	tryptase alpha/beta 1	Tpsab1	1.18899	3.00385	0.000175317	0.00321258	False
252916	RAB38, member RAS oncogene family	Rab38	1.18698	1.66825	0.000175865	0.00321756	False
287362	NLR family, pyrin domain containing 3	Nlrp3	1.8214	2.8328	0.000178249	0.00325606	False
83470	bone morphogenetic protein 1	Bmp1	0.631608	5.14321	0.000178693	0.00325905	False
304979	immunoglobulin superfamily, member 8	Igsf8	1.39201	3.79925	0.000179607	0.00327058	False
315346	integrin subunit alpha 5	Itga5	0.646897	5.1571	0.000180185	0.003276	False
266775	serpin family B member 10	Serpinb10	2.7832	1.6225	0.000180474	0.00327613	False
317409	similar to Microsomal signal peptidase 23 kDa subunit (SPase 22 kDa subunit) (SPC22/23)	MGC109340	1.77722	2.19448	0.0001826	0.00330956	False
315644	beta-carotene oxygenase 2	Bco2	2.29236	1.70814	0.000183157	0.00331449	False
29474	coronin 1B	Coro1b	0.746744	5.74569	0.000183516	0.00331582	False
29527	prostaglandin-endoperoxide synthase 2	Ptgs2	1.98143	1.8914	0.000184917	0.00333281	False
312382	ATP binding cassette subfamily G member 2	Abcg2	1.22263	1.4122	0.000185029	0.00333281	False
314397	Ras and Rab interactor 3	Rin3	0.97582	3.69195	0.00018738	0.00336994	False
66021	cytochrome b-245 beta chain	Cybb	1.61059	5.70651	0.000189699	0.00340638	False
81653	drebrin 1	Dbn1	0.829801	3.88219	0.000190606	0.0034174	False
295426	myozenin 2	Myoz2	-1.03596	8.91662	0.000193132	0.00345736	False
25192	killer cell lectin-like receptor subfamily B member 1B	Klrb1b	1.52096	0.884442	0.000197251	0.00352567	False
259275	osteoclast stimulating factor 1	Ostf1	0.75717	5.36701	0.000198698	0.00354053	False
497906	coiled-coil domain containing 69	Ccdc69	2.0506	1.13915	0.000198867	0.00354053	False
304983	transgelin 2	Tagln2	1.00515	7.05724	0.000198995	0.00354053	False
290529	transmembrane protein 254	Tmem254	1.13704	2.23243	0.00019966	0.00354694	False
306748	C-X-C motif chemokine ligand 14	Cxcl14	1.03059	5.77795	0.000200595	0.00355811	False
29388	troponin I1, slow skeletal type	Tnni1	-1.08417	8.83466	0.000201957	0.00357683	False
85251	collagen type XVIII alpha 1 chain	Col18a1	1.96587	5.61526	0.000202989	0.0035888	False
364674	TIFA inhibitor	Tifab	1.52578	1.49827	0.00020325	0.0035888	False
361765	beta-transducin repeat containing E3 ubiquitin protein ligase	Btrc	-0.904064	5.96714	0.000203999	0.00359656	False
300721	DnaJ heat shock protein family (Hsp40) member A4	Dnaja4	-0.718155	5.87865	0.000206845	0.00362675	False
288105	zinc finger and BTB domain containing 20	Zbtb20	-1.1081	1.60837	0.000206883	0.00362675	False
63852	phosphotriesterase related	Pter	1.33873	1.34007	0.000206974	0.00362675	False
311210	tetraspanin 18	Tspan18	1.23384	3.35193	0.000207052	0.00362675	False
314847	bestrophin 3	Best3	-1.26608	0.75384	0.00020727	0.00362675	False
83717	osteomodulin	Omd	-1.39594	0.977877	0.000207855	0.00363152	False
309684	integrin subunit beta 2	Itgb2	2.38017	5.33507	0.000212494	0.00370702	False
24842	tumor protein p53	Tp53	0.701274	5.25861	0.000214964	0.00374449	False
301518	protein kinase AMP-activated non-catalytic subunit gamma 3	Prkag3	-0.749484	6.05747	0.000218071	0.00379294	False
64829	unc-13 homolog A	Unc13a	1.43611	0.181347	0.000219412	0.00380522	False
24440	hemoglobin subunit beta	Hbb	1.32964	6.55245	0.000219431	0.00380522	False
29755	collagen like tail subunit of asymmetric acetylcholinesterase	Colq	-1.62081	1.68519	0.000220585	0.00381954	False
498547	epithelial stromal interaction 1	Epsti1	1.55926	1.56172	0.000231009	0.00399409	False
304447	similar to myosin, light polypeptide 6, alkali, smooth muscle and non-muscle	RGD1559821	1.02693	7.27248	0.000231419	0.00399524	False
497010	endoglin	Eng	0.920503	6.47789	0.000234612	0.0040386	False
140940	ADP-ribosylation factor 3	Arf3	0.968843	2.90031	0.000234625	0.0040386	False
684440	toll-like receptor 8	Tlr8	1.28343	1.70749	0.000235229	0.00404303	False
207123	similar to RIKEN cDNA D230025D16Rik	RGD621098	-0.947304	6.00198	0.000236945	0.0040665	False
24796	sialophorin	Spn	2.06917	1.99109	0.000240026	0.00411331	False
294449	heparan sulfate-glucosamine 3-sulfotransferase 5	Hs3st5	-1.17905	1.74159	0.000242803	0.00415407	False
24854	clusterin	Clu	1.24442	8.57429	0.000243118	0.00415407	False
29602	prostaglandin F2 receptor inhibitor	Ptgfrn	0.737195	5.61525	0.000244868	0.00417784	False
25026	adrenomedullin	Adm	1.29074	4.20677	0.000246997	0.00420799	False
29398	serine/threonine kinase 10	Stk10	0.945577	2.88451	0.000247787	0.00421527	False
500112	GTPase, IMAP family member 8	Gimap8	-0.821996	4.79001	0.000248767	0.00422258	False
308761	protein regulator of cytokinesis 1	Prc1	1.50174	1.24404	0.000248942	0.00422258	False
292051	c-Maf-inducing protein	Cmip	0.824008	4.02033	0.000249966	0.00423378	False
295037	microsomal glutathione S-transferase 2	Mgst2	1.17618	3.55554	0.000252514	0.00427072	False
497009	N-acylethanolamine acid amidase	Naaa	1.08564	3.71639	0.000253017	0.00427301	False
499772	immediate early response 5-like	Ier5l	1.08413	2.58033	0.000254395	0.00429006	False
315137	apolipoprotein B mRNA editing enzyme catalytic subunit 3B	Apobec3b	1.2605	1.22515	0.000261122	0.00439712	False
114860	UDP-galactose-4-epimerase	Gale	1.52146	1.77776	0.000264306	0.00443828	False
652957	colony stimulating factor 2 receptor alpha subunit	Csf2ra	1.61755	3.75708	0.000264329	0.00443828	False
315085	nicotinate phosphoribosyltransferase	Naprt	0.854531	3.66782	0.000265751	0.00445573	False
29563	cellular retinoic acid binding protein 2	Crabp2	1.35992	0.848591	0.000269619	0.00451408	False
81639	arachidonate 15-lipoxygenase	Alox15	1.66809	2.46299	0.000271277	0.00453531	False
81732	ARP3 actin related protein 3 homolog	Actr3	0.835558	7.09251	0.000273245	0.00456166	False
308266	zinc finger CCCH type containing 12D	Zc3h12d	1.87007	2.03076	0.000275391	0.0045909	False
295315	T-box 15	Tbx15	-0.810896	5.38465	0.000280216	0.00466465	False
497942	C-X-C motif chemokine ligand 16	Cxcl16	1.23831	4.20295	0.000283666	0.00471533	False
303336	WD repeat and SOCS box-containing 1	Wsb1	0.691902	5.33451	0.000285858	0.004745	False
299907	exostosin glycosyltransferase 1	Ext1	0.761473	4.33989	0.000287882	0.0047681	False
312490	poly(A) binding protein interacting protein 2B	Paip2b	-0.808813	4.30138	0.00028807	0.0047681	False
309646	solute carrier family 26 member 8	Slc26a8	1.19291	2.42979	0.000290177	0.00479616	False
310877	TRAF-interacting protein with forkhead-associated domain	Tifa	1.25198	2.16528	0.000290689	0.00479781	False
301229	triggering receptor expressed on myeloid cells 1	Trem1	2.54131	1.80899	0.000294643	0.00485618	False
301709	Rho GTPase activating protein 28	Arhgap28	-0.938193	4.59209	0.000298536	0.00491339	False
362896	signal transducer and activator of transcription 6	Stat6	0.630116	5.53809	0.000301686	0.00495822	False
500200	atonal bHLH transcription factor 8	Atoh8	0.93361	2.74423	0.000303358	0.00497867	False
24159	ATP citrate lyase	Acly	1.03618	5.60514	0.000304877	0.00499655	False
362015	adenosine monophosphate deaminase 2	Ampd2	0.832091	3.76449	0.000306245	0.00501191	False
116696	ST8 alpha-N-acetyl-neuraminide alpha-2,8-sialyltransferase 4	St8sia4	1.47072	0.873312	0.00030702	0.00501753	False
29510	phosphatidylcholine transfer protein	Pctp	1.15701	2.13751	0.000311207	0.00507882	False
362196	ChaC glutathione-specific gamma-glutamylcyclotransferase 1	Chac1	-0.991112	6.68082	0.00031235	0.00509035	False
298559	transcription elongation factor A3	Tcea3	-0.736343	5.77072	0.00031336	0.00509966	False
25283	glutamate-cysteine ligase, catalytic subunit	Gclc	0.622616	5.18938	0.00031441	0.0051096	False
286939	CXADR-like membrane protein	Clmp	0.635204	5.15992	0.000315041	0.00511271	False
56780	acid phosphatase, prostate	Acpp	2.67276	0.69708	0.000318492	0.00515577	False
303538	DEXH-box helicase 58	Dhx58	1.10462	1.83067	0.00031858	0.00515577	False
171569	spondin 2	Spon2	-1.81587	4.79833	0.000321607	0.00519073	False
362248	protein C receptor	Procr	1.11276	4.14791	0.000321898	0.00519073	False
89783	lysosomal protein transmembrane 5	Laptm5	1.42069	5.26453	0.000322079	0.00519073	False
171047	2'-deoxynucleoside 5'-phosphate N-hydrolase 1	Dnph1	1.19699	1.18179	0.000323581	0.00520774	False
100361733	OCIA domain containing 2	Ociad2	1.98547	0.0652753	0.00032514	0.00522559	False
79223	glycerol kinase	Gk	0.687676	4.48096	0.000329003	0.00527617	False
307270	malic enzyme 2	Me2	0.779055	3.94412	0.000329194	0.00527617	False
688721	leucine rich repeat and fibronectin type III domain containing 4	Lrfn4	1.17113	1.22458	0.000330196	0.00528495	False
25652	prostaglandin F receptor	Ptgfr	1.21857	1.21546	0.000331127	0.00528949	False
679701	BARX homeobox 2	Barx2	-1.7809	1.04329	0.000331568	0.00528949	False
499602	abhydrolase domain containing 18	Abhd18	-0.784399	3.98248	0.000331843	0.00528949	False
25306	carboxypeptidase D	Cpd	-0.846306	6.17914	0.000335523	0.00534083	False
81521	moesin	Msn	0.856859	7.45121	0.000337865	0.00537077	False
246144	interleukin 3 receptor subunit alpha	Il3ra	1.14021	2.59001	0.000341091	0.00541465	False
310843	SEC24 homolog D, COPII coat complex component	Sec24d	0.669259	4.89951	0.000342305	0.00542651	False
288669	actin related protein 2/3 complex, subunit 3	Arpc3	0.714926	6.11953	0.000347661	0.00549888	False
29261	thymidylate synthetase	Tyms	1.35795	0.589908	0.000347815	0.00549888	False
286965	actin-binding Rho activating protein	Abra	-1.23118	9.37703	0.000351705	0.00555283	False
498605	leucine rich repeat containing 25	Lrrc25	1.69782	3.22829	0.000352369	0.00555578	False
619574	hypothetical protein LOC619574	LOC619574	0.74072	4.33947	0.000361262	0.00568829	False
362165	cAMP responsive element binding protein 3-like 1	Creb3l1	0.899093	3.93095	0.000362041	0.00569285	False
312607	PDZ domain containing RING finger 3	Pdzrn3	-0.763732	6.74514	0.000364453	0.00572305	False
63865	legumain	Lgmn	1.03346	7.95476	0.000367624	0.00576506	False
308444	Axl receptor tyrosine kinase	Axl	0.743736	6.54248	0.000371134	0.00581226	False
691335	septin 6	2006-09-01	1.11652	1.67032	0.000373004	0.00583371	False
25673	annexin A5	Anxa5	0.817096	6.58442	0.000375608	0.00586655	False
81758	RB transcriptional corepressor like 2	Rbl2	-0.742512	6.8355	0.000377594	0.00588131	False
116510	TIMP metallopeptidase inhibitor 1	Timp1	2.56072	7.82981	0.00037776	0.00588131	False
171409	troponin T1, slow skeletal type	Tnnt1	-1.03698	9.19023	0.00037807	0.00588131	False
288995	G protein-coupled receptor 39	Gpr39	1.92955	0.0831458	0.000381608	0.00592843	False
687696	STAM binding protein-like 1	Stambpl1	1.02136	2.41608	0.00038414	0.0059478	False
311430	mitochondrial antiviral signaling protein	Mavs	-0.658455	5.73372	0.000384351	0.0059478	False
25626	keratin 8	Krt8	1.4188	4.31247	0.000384389	0.0059478	False
64529	cathepsin B	Ctsb	1.26893	9.73927	0.000387645	0.00599023	False
298947	phosphatidylinositol-4,5-bisphosphate 3-kinase, catalytic subunit gamma	Pik3cg	1.30275	2.8745	0.000389061	0.00600413	False
292594	leukocyte immunoglobulin like receptor B4	Lilrb4	3.35325	4.39844	0.000394371	0.00607683	False
361454	coiled-coil domain containing 28A	Ccdc28a	-0.726847	4.44139	0.000394816	0.00607683	False
25333	matrix Gla protein	Mgp	1.09306	10.2533	0.00039572	0.00608269	False
25308	cystatin B	Cstb	0.78127	5.5695	0.000398151	0.00611199	False
311437	Ras association domain family member 2	Rassf2	1.01841	2.86794	0.000398756	0.0061132	False
84355	antioxidant 1 copper chaperone	Atox1	0.878073	4.2353	0.000399971	0.00612377	False
81752	prostaglandin E receptor 2	Ptger2	2.54236	0.977481	0.000404312	0.0061821	False
25338	ninjurin 1	Ninj1	0.974724	5.73892	0.000405286	0.00618886	False
313234	TBC1 domain family, member 2	Tbc1d2	1.10718	1.72156	0.000405904	0.00619018	False
25360	thyroid stimulating hormone receptor	Tshr	2.69554	2.88037	0.000408118	0.00621578	False
404640	MAS related GPR family member X2	Mrgprx2	1.21986	1.17002	0.000409243	0.0062209	False
297960	Ras-related GTP binding D	Rragd	-0.747311	4.49243	0.000409523	0.0062209	False
362650	filamin binding LIM protein 1	Fblim1	2.06768	3.28127	0.000410909	0.00623382	False
303803	kelch-like family member 24	Klhl24	-0.605795	6.00487	0.000412143	0.00624113	False
361223	FYVE, RhoGEF and PH domain containing 3	Fgd3	1.73003	1.91517	0.000412464	0.00624113	False
286888	WAP four-disulfide core domain 2	Wfdc2	1.83588	1.68573	0.000414397	0.00626223	False
246781	protein tyrosine phosphatase, non-receptor type 7	Ptpn7	1.91848	2.22218	0.000426624	0.00643038	False
360699	DnaJ heat shock protein family (Hsp40) member C28	Dnajc28	-0.811541	3.85066	0.000426629	0.00643038	False
414783	RT1 class I, locus CE4	RT1-CE4	0.898318	4.90387	0.000427474	0.00643479	False
314619	strawberry notch homolog 2	Sbno2	1.41596	6.25137	0.000428105	0.00643596	False
60335	transglutaminase 1	Tgm1	2.82649	3.08775	0.000431547	0.00647933	False
171097	ArfGAP with dual PH domains 1	Adap1	1.40127	1.65148	0.000432488	0.00648458	False
302884	hypothetical LOC302884	MGC105649	2.21987	2.22763	0.000433011	0.00648458	False
499655	CDC28 protein kinase regulatory subunit 1B	Cks1b	0.831356	3.39602	0.000434185	0.0064938	False
246245	flavin containing monooxygenase 2	Fmo2	-0.855637	5.53745	0.000435859	0.00651047	False
24330	early growth response 1	Egr1	0.734441	6.24041	0.000438171	0.00653661	False
303068	ADAM metallopeptidase domain 19	Adam19	0.659362	5.17296	0.000441983	0.00658504	False
315593	transmembrane protein 136	Tmem136	-1.00269	1.95797	0.000442766	0.00658827	False
500037	forkhead box P2	Foxp2	-1.07424	2.2062	0.000453939	0.00674589	False
29185	CD37 molecule	Cd37	1.51962	3.03841	0.000455615	0.00675614	False
307472	SH3 domain containing ring finger 2	Sh3rf2	-0.697916	4.22808	0.00045579	0.00675614	False
29468	protein disulfide isomerase family A, member 3	Pdia3	0.883047	8.37885	0.000462438	0.00684597	False
25713	integrin subunit beta 7	Itgb7	1.97943	3.58953	0.000463332	0.00684707	False
309433	SEC31 homolog B, COPII coat complex component	Sec31b	-0.695385	4.7828	0.000463689	0.00684707	False
314596	RAS protein activator like 3	Rasal3	1.51898	1.66166	0.000464359	0.00684826	False
309139	two pore segment channel 2	Tpcn2	0.967243	3.12814	0.000466562	0.00686941	False
501925	solute carrier family 2 member 9	Slc2a9	1.22179	2.75094	0.000466974	0.00686941	False
681062	stem-loop binding protein	Slbp	0.906528	3.32823	0.000467594	0.00686986	False
113922	selenoprotein F	Selenof	0.72718	6.67173	0.000469849	0.00689267	False
25021	integrin subunit alpha M	Itgam	1.76584	4.4253	0.000470332	0.00689267	False
619549	phospholipid phosphatase 6	Plpp6	0.898352	2.96247	0.000473426	0.00692929	False
24778	solute carrier family 2 member 1	Slc2a1	0.672407	4.98051	0.000483322	0.00706524	False
367901	Bruton tyrosine kinase	Btk	1.62348	1.59592	0.000486422	0.00710164	False
308283	F-box protein 30	Fbxo30	-0.705958	5.85554	0.000488855	0.00712822	False
287788	ATP binding cassette subfamily A member 9	Abca9	-1.18769	2.98743	0.000492395	0.00717085	False
60669	chemerin chemokine-like receptor 1	Cmklr1	1.39103	3.6614	0.000498324	0.00724813	False
474143	C-type lectin domain family 4, member A	Clec4a	1.0989	1.36296	0.000505205	0.00733903	False
299186	double PHD fingers 3	Dpf3	-1.0877	1.30959	0.000511408	0.00741987	False
314910	Ngfi-A binding protein 2	Nab2	1.08078	3.22605	0.000514872	0.00746084	False
367083	ALG9, alpha-1,2-mannosyltransferase	Alg9	1.37354	4.04851	0.000515957	0.00746726	False
360777	similar to paired immunoglobin-like type 2 receptor beta	RGD1563400	2.12429	0.578924	0.000517916	0.00748629	False
305338	amyloid beta precursor protein binding family B member 2	Apbb2	-0.612156	5.05055	0.000519227	0.00749593	False
25577	tyrosine 3-monooxygenase/tryptophan 5-monooxygenase activation protein, theta	Ywhaq	0.725292	6.2017	0.000523114	0.00754269	False
500036	protein phosphatase 1, regulatory subunit 3A	Ppp1r3a	-0.942966	9.25482	0.000529522	0.00762564	False
287361	zinc finger protein 496	Zfp496	-0.629261	6.42911	0.000532356	0.00765698	False
58976	solute carrier family 30 member 1	Slc30a1	0.837054	3.36421	0.000536136	0.00770182	False
362934	lymphocyte antigen 6 family member E	Ly6e	0.761221	6.223	0.000538319	0.00772364	False
25651	selectin P	Selp	2.26168	3.35758	0.000542488	0.00776292	False
499702	synaptopodin 2	Synpo2	-0.929734	7.5514	0.000542674	0.00776292	False
310738	nerve growth factor	Ngf	1.20837	0.520024	0.000543057	0.00776292	False
287884	secreted and transmembrane 1B	Sectm1b	1.67445	3.73437	0.000549304	0.00782883	False
501742	similar to leukocyte mono-Ig-like receptor2	RGD1562667	2.28609	0.243909	0.000549494	0.00782883	False
295261	tropomodulin 4	Tmod4	-0.871276	7.67022	0.000549687	0.00782883	False
50671	fatty acid synthase	Fasn	1.84454	5.30825	0.000552332	0.00785689	False
29161	caveolin 3	Cav3	-0.607264	5.37895	0.000556441	0.00790567	False
315702	similar to human chromosome 15 open reading frame 39	RGD1305464	0.881123	3.17109	0.000559484	0.00793921	False
361300	molybdenum cofactor sulfurase	Mocos	0.753021	4.13226	0.000560579	0.00794507	False
25648	solute carrier family 7 member 1	Slc7a1	1.03113	2.71937	0.000562705	0.00796549	False
60450	megakaryocyte-associated tyrosine kinase	Matk	1.94983	2.19224	0.000563484	0.00796683	False
691657	cysteine rich protein 1	Crip1	1.20036	5.60038	0.000564704	0.00797439	False
361986	solute carrier family 39 member 1	Slc39a1	0.74879	6.55393	0.000565762	0.00797964	False
25518	peptidylprolyl isomerase A (cyclophilin A)	Ppia	0.874335	7.27256	0.000569678	0.00802515	False
311111	nitric oxide synthase trafficking	Nostrin	1.54858	1.3142	0.000574019	0.00807652	False
359726	ribonuclease L	Rnasel	0.935164	3.0534	0.000577587	0.00811579	False
85239	malonyl-CoA decarboxylase	Mlycd	-0.724697	6.28056	0.000578205	0.00811579	False
314280	SPARC related modular calcium binding 1	Smoc1	3.50985	2.82088	0.000580995	0.00814513	False
25470	potassium voltage-gated channel subfamily A member 5	Kcna5	-1.2299	1.09797	0.00058588	0.00820251	False
114901	sorbin and SH3 domain containing 2	Sorbs2	0.71915	4.08413	0.000586498	0.00820251	False
689936	G protein-coupled receptor 81	Gpr81	2.61229	1.41446	0.000588201	0.00821645	False
292729	small nuclear ribonucleoprotein polypeptide A	Snrpa	0.855029	3.51854	0.000591607	0.00825412	False
65168	secretory carrier membrane protein 2	Scamp2	0.711888	5.44193	0.000596698	0.00831518	False
296156	carboxypeptidase X (M14 family), member 1	Cpxm1	1.84704	5.60552	0.000600934	0.00836419	False
266714	myosin VIIA	Myo7a	1.11509	1.17748	0.000603075	0.00838396	False
306141	sprouty RTK signaling antagonist 2	Spry2	0.845981	4.16677	0.000606937	0.0084178	False
64160	brain abundant, membrane attached signal protein 1	Basp1	1.1349	1.55352	0.000607999	0.0084178	False
689069	parvin, gamma	Parvg	2.76049	1.71155	0.000608092	0.0084178	False
310621	IQ motif containing GTPase activating protein 3	Iqgap3	3.21036	1.19089	0.000608403	0.0084178	False
308501	CD22 molecule	Cd22	1.47825	2.19808	0.000610051	0.00843058	False
301073	hedgehog acyltransferase-like	Hhatl	-0.607139	6.20098	0.000611898	0.00844112	False
246232	UDP-glucuronate decarboxylase 1	Uxs1	0.737316	4.48807	0.00061248	0.00844112	False
117029	chemokine (C-C motif) receptor 5	Ccr5	2.30172	3.36685	0.000612989	0.00844112	False
58936	polo-like kinase 3	Plk3	1.39724	3.27957	0.000617843	0.0084979	False
498145	family with sequence similarity 220, member A	Fam220a	-0.615678	5.92686	0.0006203	0.00852163	False
311658	nuclear factor of activated T-cells 2	Nfatc2	-0.855098	3.50926	0.000622007	0.00853499	False
24861	UDP glucuronosyltransferase family 1 member A1	Ugt1a1	2.26327	5.35689	0.000622947	0.00853782	False
310097	sorting nexin 18	Snx18	0.591997	4.85991	0.00062673	0.00857956	False
502715	leucine rich repeat containing 17	Lrrc17	0.991588	2.29542	0.000635107	0.00868402	False
310756	Mov10 RISC complex RNA helicase	Mov10	0.941265	2.52823	0.000637551	0.00868569	False
66026	transient receptor potential cation channel, subfamily V, member 4	Trpv4	1.36868	1.9416	0.000638058	0.00868569	False
282817	PYD and CARD domain containing	Pycard	1.62092	2.97773	0.000638134	0.00868569	False
313340	DENN domain containing 4C	Dennd4c	-0.61549	5.67229	0.000638214	0.00868569	False
681849	muscular LMNA-interacting protein	Mlip	-0.658277	6.08195	0.0006392	0.00868894	False
25675	3-hydroxy-3-methylglutaryl-CoA reductase	Hmgcr	0.676869	4.36472	0.000642243	0.00872011	False
117030	endoplasmic reticulum protein 29	Erp29	0.89449	3.87072	0.000643225	0.00872326	False
288937	serpin family B member 8	Serpinb8	2.28389	2.13772	0.000646696	0.00875924	False
192211	prominin 2	Prom2	-0.936921	3.63437	0.000647383	0.00875924	False
84586	fibrinogen-like 2	Fgl2	1.57155	8.30758	0.000656139	0.0088674	False
25399	calcium voltage-gated channel auxiliary subunit alpha2delta 1	Cacna2d1	-0.734967	5.48746	0.000663182	0.00895219	False
498995	nuclear receptor coactivator 7	Ncoa7	0.996978	2.20038	0.000668882	0.00901866	False
64524	transketolase	Tkt	1.0104	6.33102	0.000673309	0.00906785	False
25390	ATPase Na+/K+ transporting subunit beta 3	Atp1b3	0.699592	6.34767	0.000676482	0.0090944	False
25466	interleukin 1 receptor accessory protein	Il1rap	1.27949	2.26448	0.000676843	0.0090944	False
24653	phospholipase A2 group IVA	Pla2g4a	1.05966	2.1147	0.000678294	0.00910337	False
305095	transmembrane and coiled-coil domain family 2	Tmcc2	-0.995134	3.9856	0.00068486	0.00918091	False
300474	ADAM metallopeptidase with thrombospondin type 1 motif, 15	Adamts15	1.19881	4.86244	0.000685849	0.00918358	False
317163	eukaryotic translation initiation factor 1A	Eif1a	0.814579	6.0322	0.000689213	0.00921802	False
498666	TNF superfamily member 13b	Tnfsf13b	1.08395	1.66495	0.000696597	0.00930608	False
24886	thromboxane A synthase 1	Tbxas1	1.56677	2.90853	0.000697501	0.00930748	False
309031	IKAROS family zinc finger 5	Ikzf5	-0.583685	5.58965	0.000704001	0.00938346	False
308873	ADP-ribosyltransferase 1	Art1	-0.881495	8.91359	0.000708998	0.0094373	False
362558	LDL receptor related protein 8	Lrp8	0.892295	2.60903	0.000709663	0.0094373	False
291733	solute carrier family 39 member 6	Slc39a6	0.928816	3.72958	0.000711414	0.00944978	False
363930	selectin P ligand	Selplg	1.42737	2.49566	0.000713976	0.00946204	False
246239	solute carrier family 15 member 3	Slc15a3	2.0174	2.1707	0.000714769	0.00946204	False
303218	heparan sulfate-glucosamine 3-sulfotransferase 3B1	Hs3st3b1	1.94847	1.34463	0.000714776	0.00946204	False
25554	snail family transcriptional repressor 2	Snai2	1.41245	1.39388	0.00072536	0.0095776	False
117255	protein tyrosine phosphatase, non-receptor type 12	Ptpn12	0.621327	5.50893	0.000725506	0.0095776	False
361052	cytidine and dCMP deaminase domain containing 1	Cdadc1	-0.612914	6.49365	0.000725975	0.0095776	False
296551	mitochondrial ribosomal protein L41	Mrpl41	-0.940193	6.77275	0.000728558	0.00959545	False
24165	adenosine deaminase	Ada	1.12364	2.96977	0.000728977	0.00959545	False
299314	complement factor properdin	Cfp	1.18147	4.19895	0.000729813	0.00959559	False
207118	biorientation of chromosomes in cell division 1-like 1	Bod1l1	-0.596694	5.07883	0.000732581	0.00962112	False
116690	neurofascin	Nfasc	-1.01072	1.67464	0.000734041	0.00962942	False
89827	DExD-box helicase 39A	Ddx39a	0.662371	5.29684	0.000736667	0.009653	False
54264	MAF bZIP transcription factor B	Mafb	0.809756	4.29583	0.000739594	0.00968045	False
366126	Spi-1 proto-oncogene	Spi1	1.62719	3.60298	0.000741237	0.00968679	False
293410	SWAP switching B-cell complex 70	Swap70	0.656481	4.28033	0.000741744	0.00968679	False
360604	spermatogenesis associated 20	Spata20	-1.36151	-0.214163	0.000745438	0.00972412	False
688292	caspase recruitment domain family, member 14	Card14	1.37463	-0.141138	0.000750005	0.00977274	False
300838	tropomodulin 3	Tmod3	0.851847	4.95354	0.000751832	0.0097856	False
360718	popeye domain containing 2	Popdc2	-0.690675	4.80953	0.000754444	0.00980861	False
362287	solute carrier family 17 member 9	Slc17a9	1.30276	0.816188	0.000755397	0.00980938	False
29464	solute carrier family 6 member 6	Slc6a6	0.804493	4.20726	0.000756189	0.00980938	False
24689	phosphoribosyl pyrophosphate synthetase 2	Prps2	0.825232	3.60344	0.000757392	0.00981301	False
24213	ATPase Na+/K+ transporting subunit alpha 3	Atp1a3	2.64556	1.41255	0.000758155	0.00981301	False
499972	ankyrin repeat and SOCS box-containing 10	Asb10	-0.912899	3.88494	0.000759578	0.0098205	False
266716	zinc finger and SCAN domain containing 12	Zscan12	-0.58077	4.96965	0.000765803	0.00988999	False
498587	LIM domain binding 3	Ldb3	-1.0181	9.3506	0.000769979	0.0099329	False
361430	piezo-type mechanosensitive ion channel component 1	Piezo1	1.1526	5.36181	0.000774529	0.00998054	False
502988	sestrin 2	Sesn2	1.04365	3.5781	0.00077813	0.0100117	False
25724	integrin subunit beta 4	Itgb4	-0.584024	5.50494	0.000779015	0.0100117	False
296304	ER degradation enhancing alpha-mannosidase like protein 2	Edem2	0.7774	3.50028	0.000779531	0.0100117	False
81748	plastin 3	Pls3	0.625699	5.97748	0.000782741	0.0100419	False
367092	AT-rich interaction domain 3B	Arid3b	-0.907052	4.16778	0.000785543	0.0100667	False
497896	zinc finger protein 879	Zfp879	-1.05017	1.52244	0.000796314	0.0101935	False
317578	SAM and SH3 domain containing 3	Sash3	1.63919	2.29674	0.000799028	0.010217	False
25527	prostaglandin I2 synthase	Ptgis	1.83944	5.35941	0.0008023	0.0102476	False
554172	peroxidasin	Pxdn	0.950829	4.96953	0.000803904	0.0102568	False
24968	proteasome subunit beta 8	Psmb8	1.34086	2.74925	0.000804886	0.0102581	False
64455	ras related dexamethasone induced 1	Rasd1	1.70221	3.04225	0.000820334	0.0104435	False
25618	acyl-CoA dehydrogenase, short/branched chain	Acadsb	-0.59743	5.39679	0.000822146	0.0104552	False
293042	semaphorin 4B	Sema4b	1.20911	3.86594	0.000827775	0.0105153	False
297604	lymphotoxin beta receptor	Ltbr	0.600002	5.93235	0.00083232	0.0105615	False
306616	myomesin 2	Myom2	-0.955814	8.88946	0.000834201	0.0105738	False
308346	transmembrane protein 150B	Tmem150b	2.17548	0.815445	0.000839171	0.0106216	False
79121	ADP-ribosylation factor 6	Arf6	0.573868	5.1568	0.000839793	0.0106216	False
498034	fructosamine 3 kinase	Fn3k	-0.953927	2.81894	0.000841153	0.0106272	False
301378	methyltransferase like 21C	Mettl21c	-1.61029	2.90723	0.000846536	0.0106836	False
500561	thymocyte selection associated family member 2	Themis2	1.71285	2.66783	0.000849871	0.0107141	False
500364	sarcospan	Sspn	-0.716746	6.0107	0.000853756	0.0107514	False
25612	asparagine synthetase (glutamine-hydrolyzing)	Asns	2.41281	4.38094	0.000855529	0.0107599	False
81828	zona pellucida glycoprotein 2	Zp2	-1.06816	1.4009	0.000856278	0.0107599	False
360692	similar to DNA segment, Chr 16, ERATO Doi 472, expressed	RGD1563888	1.14817	1.50623	0.00085823	0.0107728	False
25627	chymase 1	Cma1	0.831801	4.39891	0.000860619	0.0107911	False
81814	thymosin beta 4, X-linked	Tmsb4x	1.10357	9.1837	0.000864549	0.0108287	False
290280	exportin 4	Xpo4	-0.623871	5.62755	0.00086783	0.0108581	False
360914	placenta-specific 8	Plac8	1.98602	4.22056	0.000872238	0.0108894	False
306564	HtrA serine peptidase 4	Htra4	1.0638	1.08612	0.000872375	0.0108894	False
29143	granulin precursor	Grn	0.701236	6.76583	0.000873136	0.0108894	False
499430	leucine rich repeat containing 20	Lrrc20	-0.754644	7.13812	0.000879672	0.0109588	False
314349	stonin 2	Ston2	-0.989303	2.18566	0.000880586	0.0109588	False
29336	sigma non-opioid intracellular receptor 1	Sigmar1	0.861091	3.90853	0.000884729	0.0109986	False
289080	ral guanine nucleotide dissociation stimulator,-like 1	Rgl1	0.620297	5.13562	0.000890367	0.0110486	False
292073	galactosamine (N-acetyl)-6-sulfatase	Galns	0.83021	3.99154	0.000890645	0.0110486	False
361233	signal sequence receptor subunit 1	Ssr1	0.623056	6.27052	0.000893772	0.0110642	False
25632	hemoglobin, alpha 1	Hba1	1.32111	7.91612	0.000893807	0.0110642	False
29155	calpain 3	Capn3	-0.682522	6.37731	0.000895336	0.0110655	False
364878	membrane associated ring-CH-type finger 3	2003-03-01	1.1051	2.96923	0.000895817	0.0110655	False
192280	protein phosphatase 1, regulatory subunit 3B	Ppp1r3b	2.23258	3.36966	0.000901096	0.0111189	False
117242	teneurin transmembrane protein 2	Tenm2	-1.08569	1.12821	0.000905306	0.0111509	False
499956	uridine-cytidine kinase 1-like 1	Uckl1	-0.56875	5.41381	0.000905601	0.0111509	False
29275	actin, alpha, cardiac muscle 1	Actc1	-0.743512	3.62338	0.000908707	0.0111698	False
305354	toll-like receptor 1	Tlr1	2.13659	0.529039	0.000909561	0.0111698	False
305353	toll-like receptor 6	Tlr6	1.3061	1.28532	0.000910015	0.0111698	False
303241	chromodomain helicase DNA binding protein 3	Chd3	0.648577	4.74097	0.000911868	0.0111807	False
363004	proline rich 13	Prr13	0.763886	4.88969	0.000916232	0.0112224	False
81613	carcinoembryonic antigen related cell adhesion molecule 1	Ceacam1	2.22263	3.52794	0.000919379	0.0112456	False
366065	ceramide synthase 6	Cers6	1.69081	0.711329	0.000920059	0.0112456	False
690366	VANGL planar cell polarity protein 1	Vangl1	0.934398	2.97915	0.000925035	0.0112879	False
362757	retinol dehydrogenase 11 (all-trans/9-cis/11-cis)	Rdh11	0.875291	3.09537	0.000925463	0.0112879	False
362454	heme binding protein 1	Hebp1	0.840664	4.08408	0.000931957	0.0113552	False
499749	taperin	Tprn	0.954885	1.88494	0.000933098	0.0113573	False
306000	solute carrier family 25 member 37	Slc25a37	1.07209	1.62115	0.00093604	0.0113603	False
309459	neuralized E3 ubiquitin protein ligase 1	Neurl1	-0.59674	5.57841	0.000937036	0.0113603	False
64202	calreticulin	Calr	0.8911	8.93961	0.000937196	0.0113603	False
363109	phosphoglucomutase 3	Pgm3	0.938651	1.999	0.00093748	0.0113603	False
296849	pyruvate dehydrogenase kinase 3	Pdk3	1.11327	2.55137	0.000938356	0.0113603	False
245986	G protein subunit gamma 8	Gng8	1.02909	1.5816	0.00093921	0.0113603	False
313929	nuclear receptor coactivator 1	Ncoa1	-0.570265	6.09539	0.000940537	0.0113646	False
286998	zinc finger AN1-type containing 4	Zfand4	1.12167	0.59752	0.000942569	0.0113773	False
155918	lymphocyte cytosolic protein 2	Lcp2	1.15504	3.6237	0.000943599	0.011378	False
364534	single stranded DNA binding protein 4	Ssbp4	0.963201	4.15868	0.000946902	0.0114053	False
29695	gamma-aminobutyric acid type A receptor rho 2 subunit	Gabrr2	-0.951509	3.09196	0.000948143	0.0114053	False
83578	pyridoxal kinase	Pdxk	1.19702	0.81057	0.00094881	0.0114053	False
300289	angiomotin	Amot	-0.926281	5.015	0.000950362	0.0114122	False
298101	collagen type XXVII alpha 1 chain	Col27a1	1.35387	0.779607	0.000951765	0.0114132	False
65172	LIM domain kinase 1	Limk1	0.957082	3.13406	0.000952411	0.0114132	False
685076	phosphoglucomutase 2-like 1	Pgm2l1	-0.607414	4.41015	0.000956611	0.0114518	False
301226	apolipoprotein B mRNA editing enzyme catalytic subunit 2	Apobec2	-0.909022	8.34875	0.000965533	0.0115467	False
501736	Cd300a molecule	Cd300a	2.50417	2.03902	0.000966597	0.0115476	False
362219	glycerophosphocholine phosphodiesterase 1	Gpcpd1	-0.731474	7.36262	0.000968345	0.0115566	False
362398	plexin A1	Plxna1	0.822545	4.42406	0.000970192	0.0115668	False
292657	solute carrier family 1 member 5	Slc1a5	1.76319	5.16615	0.000971399	0.0115693	False
64533	pyridoxamine 5'-phosphate oxidase	Pnpo	0.885362	3.23579	0.000975438	0.0116055	False
312790	G protein-coupled receptor, class C, group 5, member A	Gprc5a	1.79443	1.59648	0.000977433	0.0116174	False
361637	acyl-CoA synthetase medium-chain family member 5	Acsm5	2.88446	1.68832	0.000979493	0.01163	False
100360218	interleukin 13 receptor, alpha 1-like	LOC100360218	1.25899	1.13497	0.000981469	0.0116416	False
25625	TNF receptor superfamily member 1A	Tnfrsf1a	0.768306	6.99698	0.000993282	0.0117697	False
303010	cytoplasmic polyadenylation element binding protein 4	Cpeb4	-0.580713	4.82667	0.000994833	0.0117761	False
114553	neutrophil cytosolic factor 1	Ncf1	1.20442	4.56878	0.00100719	0.0119102	False
288557	motile sperm domain containing 3	Mospd3	0.846846	3.39145	0.00101387	0.0119771	False
311114	kelch-like family member 23	Klhl23	-0.729603	3.77664	0.00101718	0.012004	False
289197	microsomal glutathione S-transferase 3	Mgst3	-0.575113	5.63263	0.00102157	0.0120435	False
291813	CKLF-like MARVEL transmembrane domain containing 3	Cmtm3	0.760158	3.53508	0.00102664	0.0120911	False
266764	TBK1 binding protein 1	Tbkbp1	0.859083	3.18586	0.00102848	0.0120933	False
297498	cereblon	Crbn	-0.613292	6.36619	0.0010289	0.0120933	False
363228	transmembrane protein with EGF-like and two follistatin-like domains 2	Tmeff2	0.739381	3.82417	0.00103167	0.0121109	False
140929	phosphodiesterase 7B	Pde7b	-0.787388	3.13385	0.00103249	0.0121109	False
304922	flavin containing monooxygenase 6	Fmo6	-1.39054	0.130464	0.00103577	0.0121372	False
361226	CD83 molecule	Cd83	1.17202	1.60916	0.0010384	0.0121558	False
116479	F11 receptor	F11r	0.802992	4.4324	0.00104027	0.0121654	False
24333	enolase 1	Eno1	0.794247	7.33021	0.00105069	0.0122608	False
296560	UDP-N-acetylglucosamine pyrophosphorylase 1 like 1	Uap1l1	0.736254	3.59556	0.00105075	0.0122608	False
293829	methylmalonyl CoA epimerase	Mcee	-0.6532	5.45095	0.00105201	0.0122608	False
84492	tec protein tyrosine kinase	Tec	0.808724	2.98252	0.00105264	0.0122608	False
308519	dpy-19 like C-mannosyltransferase 3	Dpy19l3	1.04189	3.56273	0.00105417	0.0122663	False
289076	regulator of G-protein signaling 18	Rgs18	1.12731	1.21168	0.00106364	0.0123641	False
498582	WDFY family member 4	Wdfy4	1.44573	2.3518	0.00107055	0.0124321	False
282838	GM2 ganglioside activator	Gm2a	2.04848	7.60315	0.00107471	0.012468	False
84686	protein phosphatase 1, regulatory subunit 9B	Ppp1r9b	0.706864	5.59881	0.00107649	0.0124761	False
307403	colony stimulating factor 1 receptor	Csf1r	0.75111	6.17044	0.00107901	0.0124929	False
303419	CUE domain containing 1	Cuedc1	-0.591506	5.257	0.00108409	0.0125392	False
29204	neuraminidase 2	Neu2	-1.105	3.23771	0.00108841	0.0125693	False
114508	fructose-bisphosphatase 2	Fbp2	-0.85872	3.16209	0.00108885	0.0125693	False
312309	zinc finger protein 775	Zfp775	-0.634826	5.11716	0.00109514	0.0126294	False
24446	hepatocyte growth factor	Hgf	0.988006	2.00788	0.00110274	0.0127016	False
56083	transglutaminase 2	Tgm2	0.82611	6.69095	0.00110359	0.0127016	False
691807	hypothetical protein LOC691807	LOC691807	0.680184	5.00453	0.00110738	0.0127327	False
287746	formin-like 1	Fmnl1	0.776049	4.57298	0.00110987	0.0127487	False
25346	ROS proto-oncogene 1 , receptor tyrosine kinase	Ros1	-0.999031	2.5686	0.00111903	0.0128413	False
100314133	microRNA 675	Mir675	-0.942374	9.54337	0.00112444	0.0128783	False
287443	ArfGAP with coiled-coil, ankyrin repeat and PH domains 1	Acap1	1.14382	1.09994	0.00112477	0.0128783	False
314897	protein phosphatase, Mg2+/Mn2+ dependent, 1H	Ppm1h	0.988653	1.67376	0.00112558	0.0128783	False
308990	hypothetical protein LOC308990	LOC308990	1.6095	2.1431	0.00112881	0.0129026	False
314800	acyl-CoA synthetase short-chain family member 3	Acss3	0.958602	3.63125	0.00114056	0.0130241	False
171043	F-box protein 32	Fbxo32	-1.01628	10.2966	0.0011423	0.0130312	False
498731	similar to Tpi1 protein	RGD1563601	-0.765394	3.50338	0.00115491	0.0131622	False
363098	cell cycle progression 1	Ccpg1	-0.691142	7.21607	0.00116917	0.0133085	False
59105	mast cell immunoglobulin-like receptor 1	Milr1	0.959007	2.57255	0.00117004	0.0133085	False
100362805	thioredoxin domain containing 5	Txndc5	0.635307	5.99523	0.00117161	0.0133134	False
58852	nuclear receptor subfamily 1, group H, member 3	Nr1h3	0.965634	4.93219	0.00117972	0.0133895	False
308742	multiple C2 and transmembrane domain containing 2	Mctp2	1.07818	0.816142	0.00118061	0.0133895	False
690073	neuroblastoma amplified sequence	Nbas	-0.581274	5.8369	0.00118932	0.0134751	False
313876	baculoviral IAP repeat-containing 6	Birc6	-0.594402	4.69892	0.00119359	0.0135103	False
29553	potassium two pore domain channel subfamily K member 3	Kcnk3	1.68279	2.74812	0.00120499	0.0136201	False
292060	interferon regulatory factor 8	Irf8	1.6037	3.94397	0.00120563	0.0136201	False
303905	poly (ADP-ribose) polymerase family, member 9	Parp9	0.79561	5.11946	0.00121219	0.0136809	False
171498	serum/glucocorticoid regulated kinase family, member 3	Sgk3	1.10928	1.09356	0.00121597	0.0137103	False
83467	slit guidance ligand 3	Slit3	0.820795	5.11026	0.00122064	0.0137497	False
297333	SET and MYND domain containing 1	Smyd1	-0.805976	5.49484	0.0012251	0.0137866	False
293118	prolylcarboxypeptidase	Prcp	0.861364	3.86574	0.0012395	0.0139351	False
114005	EPM2A, laforin glucan phosphatase	Epm2a	-1.07593	1.28532	0.00124319	0.0139551	False
25429	cytochrome P450 family 7 subfamily B member 1	Cyp7b1	0.938053	2.19179	0.00124368	0.0139551	False
287411	dehydrogenase/reductase 7C	Dhrs7c	-0.571528	5.93033	0.00124674	0.013976	False
24831	thyroid hormone receptor beta	Thrb	-0.547293	5.50998	0.00125522	0.0140529	False
360973	growth arrest-specific 2 like 1	Gas2l1	0.922528	2.03295	0.00125601	0.0140529	False
64824	Ngfi-A binding protein 1	Nab1	0.636832	4.42479	0.00125978	0.0140706	False
362431	C-type lectin domain family 4, member A3	Clec4a3	1.64073	3.3517	0.0012605	0.0140706	False
367304	adaptor related protein complex 1 sigma 3 subunit	Ap1s3	1.22117	0.456687	0.00126123	0.0140706	False
25617	heat shock protein family A member 5	Hspa5	1.15854	9.01575	0.00126313	0.0140783	False
298917	isoamyl acetate hydrolyzing esterase 1	Iah1	0.842377	3.77761	0.00126952	0.014136	False
315764	pleckstrin homology domain containing O2	Plekho2	0.851839	3.07855	0.00127667	0.014184	False
366856	mitochondrial transcription termination factor 2	Mterf2	-0.842891	2.83791	0.00127719	0.014184	False
100360582	5', 3'-nucleotidase, cytosolic	Nt5c	1.22562	1.01869	0.00127748	0.014184	False
25495	noggin	Nog	1.14837	1.59532	0.00128122	0.0142118	False
291555	ATPase phospholipid transporting 8B1	Atp8b1	0.70695	3.70513	0.00128619	0.0142535	False
502225	leucine rich repeat containing 14B	Lrrc14b	-0.757373	7.12208	0.00129044	0.0142869	False
501065	CKLF-like MARVEL transmembrane domain containing 7	Cmtm7	1.37998	4.15547	0.00130236	0.0143901	False
291699	StAR-related lipid transfer domain containing 4	Stard4	0.992892	1.47455	0.00130343	0.0143901	False
293783	leupaxin	Lpxn	0.938149	2.37794	0.00130347	0.0143901	False
64443	G-protein coupled receptor 88	Gpr88	1.64231	2.09627	0.00130909	0.0144385	False
59106	latent transforming growth factor beta binding protein 2	Ltbp2	1.12196	2.40765	0.0013148	0.0144877	False
293551	ADP-ribosylation factor like GTPase 6 interacting protein 1	Arl6ip1	0.756722	4.68197	0.00132822	0.0146217	False
303638	ATP-binding cassette, subfamily A (ABC1), member 8a	Abca8a	-0.907622	7.61999	0.00133089	0.0146373	False
362924	ST3 beta-galactoside alpha-2,3-sialyltransferase 1	St3gal1	0.685528	6.35282	0.00133827	0.0147045	False
60355	N-ethylmaleimide sensitive factor, vesicle fusing ATPase	Nsf	0.736392	4.42143	0.00133991	0.0147086	False
362988	copine 8	Cpne8	1.31674	5.17131	0.00134438	0.0147439	False
299858	LDL receptor related protein 1	Lrp1	1.04477	9.05022	0.00134689	0.0147575	False
301173	phospholipase C-like 2	Plcl2	-0.636067	5.8565	0.00134882	0.0147647	False
303875	negative regulator of reactive oxygen species	Nrros	1.06502	4.39626	0.00135537	0.0148225	False
24967	proteasome subunit beta 9	Psmb9	1.471	3.3986	0.00136022	0.0148615	False
291320	family with sequence similarity 188, member A	Fam188a	0.699101	3.78723	0.00136609	0.0149117	False
316638	sushi, nidogen and EGF-like domains 1	Sned1	1.05621	3.27576	0.00136966	0.0149366	False
305941	sarcoglycan, gamma	Sgcg	-0.69283	7.36376	0.00137798	0.0150133	False
303380	schlafen 2	Slfn2	0.848341	5.79069	0.00138665	0.0150936	False
362087	UBA domain containing 1	Ubac1	-0.676088	7.25882	0.0013966	0.0151735	False
100360872	mast cell protease 1-like 1	Mcpt1l1	0.706723	5.56637	0.00139748	0.0151735	False
501043	interleukin 20 receptor subunit beta	Il20rb	0.965348	1.496	0.0013979	0.0151735	False
362046	dual adaptor of phosphotyrosine and 3-phosphoinositides 1	Dapp1	1.15636	1.73518	0.00140305	0.0152152	False
360867	coiled-coil domain containing 181	Ccdc181	-0.607793	4.4587	0.00140927	0.0152648	False
57027	ADAM metallopeptidase domain 17	Adam17	0.618096	5.57772	0.00141025	0.0152648	False
24390	beta-1,4-galactosyltransferase 1	B4galt1	0.674805	5.47656	0.00142044	0.0153516	False
315722	ADP-dependent glucokinase	Adpgk	0.716745	4.10051	0.0014209	0.0153516	False
304244	FRY microtubule binding protein	Fry	-0.734682	6.85286	0.00143053	0.0154206	False
295588	Rho family GTPase 3	Rnd3	0.800257	4.08657	0.00143063	0.0154206	False
305351	kelch-like family member 5	Klhl5	0.956374	2.44389	0.00143127	0.0154206	False
499537	FYN binding protein 1	Fyb1	1.62175	3.17024	0.00143321	0.0154272	False
310540	family with sequence similarity 198, member B	Fam198b	0.708953	4.23902	0.00143481	0.0154301	False
114090	early growth response 2	Egr2	0.977762	1.99059	0.00143922	0.0154633	False
64015	KH RNA binding domain containing, signal transduction associated 3	Khdrbs3	1.05495	2.49267	0.00144068	0.0154647	False
24223	beta-2 microglobulin	B2m	0.98818	9.14503	0.00144547	0.0155018	False
296511	ALX homeobox 4	Alx4	-1.18616	0.434879	0.00145393	0.0155782	False
362238	dual specificity phosphatase 15	Dusp15	-1.06341	1.66448	0.00145676	0.015588	False
361517	vasodilator-stimulated phosphoprotein	Vasp	0.699658	4.24199	0.00145754	0.015588	False
499260	otoancorin	Otoa	-1.52661	0.623962	0.00145958	0.015588	False
293860	filamin A	Flna	0.988564	6.96862	0.0014602	0.015588	False
85240	phospholipase C, beta 2	Plcb2	1.12926	1.15337	0.00146732	0.0156496	False
360908	cell division cycle 7	Cdc7	1.29998	0.562023	0.00147468	0.0157137	False
24434	glucuronidase, beta	Gusb	0.734511	3.47512	0.00147812	0.0157359	False
500929	tubulin, alpha 1B	Tuba1b	1.23069	6.22694	0.00148031	0.0157449	False
291095	GDP-mannose 4, 6-dehydratase	Gmds	1.075	1.91915	0.00148203	0.0157487	False
360579	chemokine (C-C motif) ligand 9	Ccl9	4.88398	4.19558	0.00148495	0.0157655	False
690492	CD33 molecule	Cd33	1.3607	0.963772	0.00148692	0.0157719	False
291553	neural precursor cell expressed, developmentally down-regulated 4-like, E3 ubiquitin protein ligase	Nedd4l	-0.702256	5.95272	0.00150369	0.0159353	False
290350	lysyl oxidase-like 2	Loxl2	0.883243	2.79271	0.00151214	0.0160103	False
313587	zinc finger CCCH type containing 12A	Zc3h12a	0.694126	4.16432	0.00152044	0.0160689	False
308622	taxilin beta	Txlnb	-0.924229	8.73274	0.00152044	0.0160689	False
290561	troponin C1, slow skeletal and cardiac type	Tnnc1	-0.850117	8.9663	0.00152606	0.0161	False
362862	heat shock protein 90 beta family member 1	Hsp90b1	1.07616	8.94957	0.00152615	0.0161	False
494338	tripartite motif-containing 25	Trim25	0.856915	3.39045	0.00153565	0.0161855	False
29663	adaptor-related protein complex 1, beta 1 subunit	Ap1b1	0.612174	5.826	0.00155385	0.0163626	False
295027	protocadherin 18	Pcdh18	0.829449	3.02218	0.0015573	0.016384	False
308701	threonyl-tRNA synthetase-like 2	Tarsl2	-0.627554	5.19734	0.00156625	0.0164633	False
65096	adhesion G protein-coupled receptor L1	Adgrl1	1.04312	2.79962	0.00157024	0.0164904	False
361505	CDC42 effector protein 5	Cdc42ep5	1.07015	1.15872	0.00158661	0.0166473	False
363145	GDP-mannose pyrophosphorylase B	Gmppb	0.974459	2.50048	0.00159309	0.0167002	False
294257	complement factor B	Cfb	1.47661	4.80306	0.00159592	0.0167148	False
294410	mannosidase, alpha, class 1A, member 1	Man1a1	0.67494	5.34102	0.00160476	0.0167922	False
314251	spectrin, beta, erythrocytic	Sptb	-0.711323	6.87722	0.00161116	0.0168365	False
362871	ELK3, ETS transcription factor	Elk3	0.614091	4.76502	0.00161188	0.0168365	False
266608	frizzled class receptor 9	Fzd9	-0.945811	2.67419	0.00161467	0.0168505	False
500616	suppressor of cytokine signaling 5	Socs5	0.724408	5.04235	0.00162209	0.0169127	False
309499	myoferlin	Myof	0.675201	4.13515	0.00162377	0.0169151	False
54254	GATA binding protein 4	Gata4	1.47883	0.508178	0.00162722	0.0169359	False
304488	PTC7 protein phosphatase homolog	Pptc7	-0.640374	6.70319	0.00163673	0.0170196	False
100125370	NAD kinase	Nadk	0.767786	6.16539	0.00165454	0.0171745	False
295052	cyclin A1	Ccna1	-1.10564	1.58582	0.0016547	0.0171745	False
140473	atypical chemokine receptor 2	Ackr2	0.861551	2.33197	0.0016565	0.0171745	False
311742	cell division cycle associated 7	Cdca7	1.30233	0.976238	0.00165752	0.0171745	False
362040	oligosaccharyltransferase complex non-catalytic subunit	Ostc	0.561193	5.61464	0.00166597	0.0172467	False
84420	adenylate cyclase 7	Adcy7	0.815892	2.71828	0.00167197	0.0172934	False
287615	vascular endothelial zinc finger 1	Vezf1	-0.584899	6.63718	0.00167611	0.0173104	False
304023	ST3 beta-galactoside alpha-2,3-sialyltransferase 6	St3gal6	-0.57773	5.66921	0.00167659	0.0173104	False
501841	coronin 1C	Coro1c	0.534036	5.43712	0.00168139	0.0173446	False
140448	solute carrier family 8 member A3	Slc8a3	-0.644616	4.03168	0.0016847	0.0173633	False
317676	linker for activation of T cells family, member 2	Lat2	0.980774	1.40227	0.00169164	0.0174194	False
289264	gremlin 2, DAN family BMP antagonist	Grem2	1.01512	1.80173	0.00169592	0.017448	False
294499	family with sequence similarity 241 member B	Fam241b	1.47253	0.932219	0.00169765	0.0174504	False
361596	isocitrate dehydrogenase (NADP(+)) 2, mitochondrial	Idh2	-0.825426	9.07674	0.00170743	0.0175355	False
291359	lymphocyte antigen 86	Ly86	1.94726	1.59279	0.00171544	0.0175934	False
691504	zinc finger protein, multitype 1	Zfpm1	0.64291	4.45623	0.0017161	0.0175934	False
292735	Sh3kbp1 binding protein 1	Shkbp1	0.850718	2.70671	0.00172421	0.017661	False
313548	zinc finger protein 691	Zfp691	-0.647148	4.13473	0.00173675	0.0177738	False
25748	5'-aminolevulinate synthase 2	Alas2	1.05535	2.33585	0.00175887	0.0179681	False
686326	interferon alpha and beta receptor subunit 2	Ifnar2	0.703585	3.72792	0.0017592	0.0179681	False
315189	proline rich 5	Prr5	0.790226	2.88893	0.00176037	0.0179681	False
500011	sterile alpha motif domain containing 9	Samd9	1.16848	3.32487	0.00176788	0.018029	False
362164	autophagy related 13	Atg13	-0.694426	6.1782	0.00177028	0.018035	False
303666	CD300C molecule 2	Cd300c2	2.44868	2.43544	0.00177157	0.018035	False
362325	MyoD family inhibitor domain containing	Mdfic	0.763265	4.60375	0.00177466	0.0180506	False
500308	CECR2, histone acetyl-lysine reader	Cecr2	-0.683315	3.96574	0.00178849	0.0181754	False
366140	four jointed box 1	Fjx1	1.15051	0.793685	0.00181765	0.0184534	False
63836	actinin alpha 4	Actn4	0.545629	6.3799	0.00181936	0.0184534	False
307414	similar to interferon-inducible GTPase	MGC108823	1.12503	2.18844	0.0018206	0.0184534	False
58919	cyclin D1	Ccnd1	0.963725	3.41675	0.00182609	0.0184929	False
362993	Rho family GTPase 1	Rnd1	1.16339	3.47614	0.00183906	0.0186081	False
100360664	ribosomal RNA processing 36	Rrp36	-0.555983	5.94844	0.00184554	0.0186575	False
289350	RAB3 GTPase activating non-catalytic protein subunit 2	Rab3gap2	-0.577935	5.98104	0.00184904	0.0186655	False
116591	Fc fragment of IgG, low affinity IIa, receptor	Fcgr2a	1.77304	0.736533	0.00184954	0.0186655	False
362628	interferon, lambda receptor 1	Ifnlr1	1.73651	1.93869	0.00187232	0.018879	False
362810	coenzyme Q10A	Coq10a	-0.596732	6.66741	0.00187854	0.0189252	False
64561	phosphorylase kinase regulatory subunit alpha 1	Phka1	-0.787892	7.501	0.00188045	0.0189281	False
315880	TBC1 domain family, member 2B	Tbc1d2b	0.686178	5.43053	0.00188342	0.0189417	False
498757	acyloxyacyl hydrolase	Aoah	1.28479	0.557077	0.00188788	0.0189701	False
498579	similar to chromosome 10 open reading frame 71	RGD1564899	-0.874644	7.91379	0.00188973	0.0189723	False
292172	EYA transcriptional coactivator and phosphatase 4	Eya4	-0.816986	3.02037	0.00189331	0.0189918	False
83688	transaldolase 1	Taldo1	0.826225	6.24116	0.0018963	0.018999	False
102552920	armadillo repeat-containing X-linked protein 5-like	LOC102552920	-0.598482	4.6899	0.00189728	0.018999	False
362242	syntrophin, alpha 1	Snta1	-0.567952	6.30574	0.00190873	0.0190971	False
309816	laminin subunit alpha 4	Lama4	0.683507	5.85957	0.00191715	0.0191587	False
29264	CAP-GLY domain containing linker protein 2	Clip2	0.7852	3.50342	0.00191818	0.0191587	False
100360475	polypeptide N-acetylgalactosaminyltransferase 15	Galnt15	-0.839753	4.5408	0.00192248	0.0191852	False
310772	DENN domain containing 2D	Dennd2d	1.93915	1.78728	0.00192427	0.0191866	False
309653	FYVE, RhoGEF and PH domain containing 2	Fgd2	1.18711	2.55626	0.00193034	0.0192307	False
690955	leukocyte immunoglobulin-like receptor, subfamily B (with TM and ITIM domains), member 3B	Lilrb3b	1.26951	-0.017273	0.0019371	0.0192816	False
312440	lysine demethylase 3A	Kdm3a	-0.56155	6.00831	0.00194407	0.0192997	False
25506	prolyl 4-hydroxylase subunit beta	P4hb	0.785605	8.85306	0.00194499	0.0192997	False
297822	tumor protein p53 inducible nuclear protein 1	Tp53inp1	-0.572301	5.69999	0.00194534	0.0192997	False
362843	ilvB acetolactate synthase like	Ilvbl	1.13494	4.56839	0.00194556	0.0192997	False
310667	ceramide synthase 2	Cers2	0.837701	5.72415	0.00195165	0.0193436	False
25505	purinergic receptor P2X 1	P2rx1	1.10196	1.16054	0.00195349	0.0193454	False
192183	nectin cell adhesion molecule 1	Nectin1	1.21838	2.23983	0.00196177	0.0194109	False
360932	ATPase phospholipid transporting 10D (putative)	Atp10d	0.926897	3.33208	0.00196595	0.0194357	False
299269	interferon, alpha-inducible protein 27 like 2B	Ifi27l2b	1.30914	5.36375	0.00197276	0.0194714	False
29685	minichromosome maintenance complex component 6	Mcm6	0.958565	2.70148	0.00197291	0.0194714	False
309147	aldehyde dehydrogenase 3 family, member B1	Aldh3b1	1.2626	1.28404	0.00197829	0.019508	False
140668	ATP binding cassette subfamily C member 3	Abcc3	0.919445	3.19085	0.00199746	0.0196803	False
369016	myeloid-associated differentiation marker	Myadm	0.621969	6.12269	0.00200219	0.0197102	False
690115	dynein heavy chain domain 1	Dnhd1	1.0884	0.933739	0.00200449	0.0197129	False
362185	metallophosphoesterase domain containing 2	Mpped2	-0.979246	1.16644	0.00200585	0.0197129	False
140924	interleukin 2 receptor subunit gamma	Il2rg	1.1793	3.34395	0.00202202	0.019855	False
362530	AT-hook transcription factor	Akna	1.0581	2.61743	0.00203462	0.0199524	False
290403	RUN and cysteine rich domain containing beclin 1 interacting protein like	Rubcnl	1.08344	0.509085	0.00203536	0.0199524	False
363158	cartilage associated protein	Crtap	0.851024	3.80718	0.00204261	0.0200066	False
25388	arrestin, beta 2	Arrb2	0.694352	4.08575	0.00205588	0.0201196	False
367714	RP2, ARL3 GTPase activating protein	Rp2	1.0339	0.748118	0.00206601	0.0202018	False
315203	GRAM domain containing 4	Gramd4	0.628098	4.48584	0.00207888	0.0203005	False
116699	inositol polyphosphate-4-phosphatase type II B	Inpp4b	-0.995481	0.783731	0.0020796	0.0203005	False
58945	dynein light chain LC8-type 1	Dynll1	0.676299	5.71748	0.00209799	0.0204629	False
302972	amidohydrolase domain containing 2	Amdhd2	0.782745	3.26697	0.00210883	0.0205514	False
58923	MEFV, pyrin innate immunity regulator	Mefv	1.90662	1.17586	0.00211148	0.02056	False
29194	choline kinase alpha	Chka	0.664793	3.94534	0.00213062	0.020729	False
100361818	nuclear factor of activated T-cells 1	Nfatc1	-0.592941	5.8811	0.00213303	0.0207351	False
300105	tubulin tyrosine ligase like 12	Ttll12	0.843299	3.26346	0.00214952	0.0208779	False
25332	O-6-methylguanine-DNA methyltransferase	Mgmt	1.03837	2.4879	0.00217103	0.0210693	False
360627	FK506 binding protein 10	Fkbp10	0.711667	4.61806	0.00218475	0.0211847	False
691307	leucine rich repeat containing 39	Lrrc39	-0.763903	5.12336	0.00219473	0.0212639	False
29513	mitogen activated protein kinase 13	Mapk13	1.52566	-0.185003	0.00220405	0.0213328	False
304289	diacylglycerol lipase, beta	Daglb	0.705328	4.61363	0.00220884	0.0213328	False
83720	FAT atypical cadherin 1	Fat1	0.832108	5.43308	0.00220897	0.0213328	False
362962	chromobox 7	Cbx7	-0.578254	5.19226	0.00221055	0.0213328	False
444983	apolipoprotein L domain containing 1	Apold1	0.995884	3.9464	0.00221174	0.0213328	False
84402	secreted frizzled-related protein 1	Sfrp1	0.974093	5.56739	0.00221396	0.0213328	False
361710	signal-induced proliferation-associated 1	Sipa1	0.635793	4.55435	0.00221468	0.0213328	False
81002	tripartite motif-containing 23	Trim23	-0.538824	6.03222	0.00221931	0.0213597	False
316740	myomesin 1	Myom1	-0.919107	9.47267	0.00222118	0.0213601	False
308100	acetyl-CoA acetyltransferase 2	Acat2	1.4961	1.17913	0.00223745	0.0214987	False
498704	proline rich 7 (synaptic)	Prr7	1.11992	0.354397	0.00224366	0.0215406	False
363474	apolipoprotein O	Apoo	-0.536409	4.66985	0.00225575	0.0216388	False
24404	glutathione peroxidase 1	Gpx1	0.813426	7.64343	0.00227457	0.0218014	False
498174	nipsnap homolog 2	Nipsnap2	-0.631471	6.80561	0.00229179	0.0219484	False
171128	GTP cyclohydrolase I feedback regulator	Gchfr	1.94504	1.91269	0.00232668	0.0222642	False
312159	family with sequence similarity 3, member C	Fam3c	0.731853	3.76971	0.00233334	0.0223096	False
362113	peptidyl-tRNA hydrolase 1 homolog	Ptrh1	1.00499	1.33925	0.00234684	0.0224202	False
29611	dihydrolipoamide branched chain transacylase E2	Dbt	-0.701793	7.3493	0.00235251	0.0224376	False
25056	retinol binding protein 1	Rbp1	1.29051	3.30019	0.00235252	0.0224376	False
171407	G protein-coupled receptor associated sorting protein 1	Gprasp1	-0.609867	5.99991	0.0023657	0.0225448	False
170520	cytoglobin	Cygb	0.682094	6.05939	0.0023713	0.0225797	False
304805	cytochrome b5 reductase 1	Cyb5r1	-0.558317	6.66274	0.00237515	0.0225979	False
170546	ryanodine receptor 3	Ryr3	-0.823021	3.72455	0.00237856	0.0226	False
29337	phospholipase C, gamma 2	Plcg2	1.14583	1.70303	0.00237926	0.0226	False
302845	melanoma antigen family A, 11	Magea11	-0.949972	1.43879	0.00238436	0.02263	False
499751	mannosidase, alpha, class 1B, member 1	Man1b1	0.547542	5.38287	0.00238679	0.0226346	False
311622	serine/threonine kinase 4	Stk4	0.550591	4.8423	0.0023948	0.0226766	False
287796	solute carrier family 39, member 11	Slc39a11	0.888914	2.70143	0.00239511	0.0226766	False
83805	SRC proto-oncogene, non-receptor tyrosine kinase	Src	0.81289	3.40492	0.00239867	0.0226918	False
246266	asparaginase	Aspg	4.19697	3.30577	0.0024008	0.0226935	False
360962	transforming, acidic coiled-coil containing protein 3	Tacc3	1.18654	1.44078	0.00240943	0.0227472	False
690825	G protein subunit gamma transducin 2	Gngt2	1.94107	2.25165	0.00241039	0.0227472	False
308028	solute carrier family 2 member 12	Slc2a12	-0.822675	3.248	0.00241345	0.0227577	False
316102	leucine zipper transcription factor-like 1	Lztfl1	-0.566618	4.71866	0.00242033	0.022804	False
83731	potassium calcium-activated channel subfamily M alpha 1	Kcnma1	-0.706962	5.02945	0.00242621	0.0228409	False
311821	1-acylglycerol-3-phosphate O-acyltransferase 2	Agpat2	1.92287	4.77902	0.00244004	0.0229525	False
24373	follistatin	Fst	0.919051	2.80049	0.00244403	0.022953	False
298139	similar to RIKEN cDNA 2310003M01	LOC298139	-0.632833	7.12948	0.00244579	0.022953	False
246249	Rho GTPase activating protein 4	Arhgap4	1.02313	2.80317	0.00244601	0.022953	False
246756	TNFRSF1A-associated via death domain	Tradd	0.971272	2.50207	0.00246184	0.023083	False
685899	sushi, von Willebrand factor type A, EGF and pentraxin domain containing 1	Svep1	0.596401	5.69872	0.00248809	0.0233104	False
24934	killer cell lectin like receptor K1	Klrk1	1.90634	0.412686	0.0024957	0.0233628	False
689029	transmembrane 6 superfamily member 2	Tm6sf2	1.6544	0.839797	0.00250613	0.0234416	False
24907	dystrophin	Dmd	-0.635102	6.59492	0.00250957	0.0234466	False
266713	MNAT1, CDK activating kinase assembly factor	Mnat1	-0.509958	5.32525	0.0025107	0.0234466	False
295365	adhesion molecule with Ig like domain 1	Amigo1	-0.513937	5.54596	0.00251976	0.0235124	False
292267	acidic residue methyltransferase 1	Armt1	-0.519002	4.99974	0.00254406	0.0237201	False
81527	neuropilin 2	Nrp2	0.947796	3.83101	0.00255067	0.0237627	False
64120	potassium two pore domain channel subfamily K member 13	Kcnk13	1.4698	0.173082	0.00255648	0.0237978	False
314870	interleukin-1 receptor-associated kinase 3	Irak3	0.669567	4.71235	0.00256261	0.0238357	False
686323	thyroid hormone receptor interactor 6	Trip6	0.996688	2.70644	0.00256697	0.0238572	False
316014	neurobeachin-like 2	Nbeal2	0.718648	3.98308	0.00257092	0.0238749	False
300950	splA/ryanodine receptor domain and SOCS box containing 4	Spsb4	-0.953097	2.3071	0.00257802	0.0239139	False
363790	F-box protein 40	Fbxo40	-0.682428	7.26961	0.00257923	0.0239139	False
246298	retinol saturase	Retsat	1.80707	7.96057	0.00258161	0.0239169	False
298199	perilipin 2	Plin2	1.2465	6.48592	0.00259255	0.0239991	False
65161	lipopolysaccharide-induced TNF factor	Litaf	0.722714	6.64428	0.00259651	0.0240167	False
293507	septin 1	2001-09-01	1.06972	0.621852	0.0026052	0.0240599	False
81740	pericentriolar material 1	Pcm1	-0.633015	7.08656	0.0026073	0.0240599	False
363020	single-pass membrane protein with coiled-coil domains 4	Smco4	0.922845	1.87096	0.00260739	0.0240599	False
294375	receptor accessory protein 3	Reep3	0.5237	5.90131	0.00261723	0.0241316	False
301012	collagen type VII alpha 1 chain	Col7a1	-0.613515	5.33092	0.00263417	0.0242686	False
300920	claudin 2	Cldn2	1.2713	2.21709	0.00263817	0.0242862	False
681178	polycomb group ring finger 5	Pcgf5	-0.551363	4.99989	0.00266014	0.0244691	False
312701	CD163 molecule	Cd163	0.948186	6.03049	0.00266354	0.024481	False
293820	phosphoserine aminotransferase 1	Psat1	2.08974	3.21335	0.00267338	0.024552	False
364901	ST8 alpha-N-acetyl-neuraminide alpha-2,8-sialyltransferase 5	St8sia5	-0.834645	2.8461	0.00268999	0.0246852	False
366300	protein-L-isoaspartate (D-aspartate) O-methyltransferase domain containing 1	Pcmtd1	-0.574622	6.67666	0.00269395	0.0247019	False
307351	tubulin, beta 6 class V	Tubb6	1.30486	6.74299	0.00271525	0.0248777	False
288744	similar to hypothetical protein A530094D01	RGD1306556	0.651545	5.10928	0.0027203	0.0248996	False
287101	protein kinase, membrane associated tyrosine/threonine 1	Pkmyt1	1.1221	0.126994	0.00272192	0.0248996	False
25374	aminolevulinate dehydratase	Alad	0.714353	4.41051	0.00272615	0.0249187	False
360302	protein tyrosine phosphatase, receptor type, K	Ptprk	0.541384	4.75109	0.00273052	0.024939	False
59075	G protein-coupled receptor kinase 5	Grk5	0.892261	3.11609	0.00273294	0.0249416	False
78951	heat shock protein family B (small) member 3	Hspb3	-0.675551	4.26534	0.00274886	0.0250672	False
308977	interleukin 21 receptor	Il21r	1.88181	0.675716	0.00275649	0.025117	False
306324	tetraspanin 14	Tspan14	0.60971	5.01479	0.00276755	0.0251981	False
54249	complement factor D	Cfd	2.1599	8.55891	0.00277455	0.0252421	False
303090	immunity-related GTPase M	Irgm	0.725374	4.61762	0.00277795	0.0252533	False
25361	vascular cell adhesion molecule 1	Vcam1	1.76646	3.852	0.00278745	0.0253182	False
360738	transport and golgi organization 2 homolog	Tango2	-0.57275	6.0588	0.00279013	0.0253182	False
24179	angiotensinogen	Agt	4.14368	6.17294	0.00279162	0.0253182	False
503214	RNA binding protein with multiple splicing 2	Rbpms2	1.07372	2.60622	0.00281203	0.0254805	False
362149	corepressor interacting with RBPJ, 1	Cir1	-0.660159	6.00129	0.0028159	0.0254805	False
292905	histidine rich calcium binding protein	Hrc	-0.82684	8.95482	0.0028166	0.0254805	False
315594	out at first homolog	Oaf	0.748931	4.58093	0.00281827	0.0254805	False
303298	RAP1 GTPase activating protein 2	Rap1gap2	1.21879	1.32156	0.00282304	0.0255038	False
25668	CD38 molecule	Cd38	1.04104	3.80613	0.00285927	0.0258111	False
171503	calcium/calmodulin-dependent protein kinase I	Camk1	0.655656	4.12269	0.00287287	0.0259138	False
366262	RNA binding motif protein 38	Rbm38	-0.576532	6.95371	0.00287716	0.0259209	False
314212	dishevelled associated activator of morphogenesis 1	Daam1	0.625501	4.01563	0.00287812	0.0259209	False
117558	myosin light chain kinase 2	Mylk2	-0.81282	9.46293	0.00288429	0.0259484	False
312654	transmembrane and coiled-coil domain family 1	Tmcc1	-0.512503	5.82612	0.00288563	0.0259484	False
308821	RAB30, member RAS oncogene family	Rab30	1.03114	2.49995	0.00289942	0.0260523	False
297525	makorin, ring finger protein, 2	Mkrn2	-0.519052	5.76936	0.00290278	0.0260623	False
117540	phospholipid scramblase 1	Plscr1	1.0967	2.45524	0.00291536	0.0261479	False
85490	collagen type V alpha 1 chain	Col5a1	0.648242	5.44478	0.00291873	0.0261479	False
311592	similar to hypothetical protein D630003M21	RGD1563354	-0.941825	1.46865	0.00291906	0.0261479	False
64537	heparanase	Hpse	0.834852	2.66471	0.00293925	0.0263025	False
291984	dipeptidase 2	Dpep2	0.986924	1.41186	0.00294083	0.0263025	False
299285	calmin	Clmn	1.83137	1.29024	0.0029629	0.0264795	False
290623	cytochrome P450, family 4, subfamily f, polypeptide 18	Cyp4f18	0.889511	1.86325	0.00297793	0.0265934	False
246115	phospholipid phosphatase 2	Plpp2	1.21695	0.655069	0.00298111	0.0266014	False
364147	Yip1 domain family, member 7	Yipf7	-0.541793	4.85731	0.00299109	0.02667	False
360797	RAB guanine nucleotide exchange factor 1	Rabgef1	-0.560783	5.97516	0.00300546	0.0267776	False
292483	syntaxin 11	Stx11	1.35316	1.1984	0.00300778	0.0267777	False
65152	phosphofructokinase, muscle	Pfkm	-0.861217	10.5694	0.00305912	0.027214	False
309098	tubulin, gamma complex associated protein 2	Tubgcp2	-0.545958	5.70924	0.00306569	0.0272517	False
294972	methylcrotonoyl-CoA carboxylase 1	Mccc1	-0.508639	5.6117	0.00308569	0.0274084	False
303021	SH3 and PX domains 2B	Sh3pxd2b	1.14774	2.60598	0.00311169	0.0275988	False
690507	similar to Vomeromodulin	LOC690507	-0.998546	1.0156	0.00311186	0.0275988	False
81810	transforming growth factor, beta receptor 2	Tgfbr2	0.589006	6.61919	0.00311589	0.0276135	False
294048	phosphoinositide-3-kinase adaptor protein 1	Pik3ap1	1.14354	3.29156	0.0031284	0.0276861	False
317371	Wiskott-Aldrich syndrome	Was	1.06593	2.19639	0.00312885	0.0276861	False
84424	transducin-like enhancer of split 3	Tle3	0.692329	4.3938	0.00313866	0.0277336	False
295425	ubiquitin specific peptidase 53	Usp53	-0.525505	6.02916	0.00314617	0.0277336	False
29307	G protein-coupled receptor 182	Gpr182	1.34315	1.92477	0.00314703	0.0277336	False
100188934	cortexin 3	Ctxn3	-1.14663	3.45219	0.00314734	0.0277336	False
310655	cingulin	Cgn	1.29673	1.01986	0.00314828	0.0277336	False
81782	sterol O-acyltransferase 1	Soat1	0.838725	3.56671	0.00314851	0.0277336	False
24412	glutamate ionotropic receptor NMDA type subunit 2D	Grin2d	1.40076	-0.0472989	0.00315434	0.0277639	False
366697	serine palmitoyltransferase, long chain base subunit 2	Sptlc2	1.02204	3.62302	0.00316802	0.0278633	False
498736	tubulin, beta 2A class IIa	Tubb2a	0.743405	3.14807	0.0031761	0.0279132	False
81530	pyruvate dehydrogenase kinase 2	Pdk2	-0.611729	7.1972	0.0031789	0.0279154	False
296851	paraoxonase 2	Pon2	0.749046	5.12156	0.00318115	0.0279154	False
296257	cystatin F	Cst7	1.27665	2.60888	0.00318569	0.0279342	False
311827	ADAMTS-like 2	Adamtsl2	1.02338	1.67374	0.00322142	0.0282228	False
306810	sushi domain containing 3	Susd3	1.69346	0.492821	0.00322346	0.0282228	False
191574	aldo-keto reductase family 1, member C14	Akr1c14	1.88318	6.9613	0.00324112	0.0283495	False
298436	tetraspanin 1	Tspan1	-1.46818	-0.0954287	0.0032428	0.0283495	False
450235	adhesion G protein-coupled receptor E4	Adgre4	1.14527	0.481607	0.00325979	0.0284572	False
114634	SIX homeobox 1	Six1	-0.614208	7.23467	0.00326001	0.0284572	False
313481	zinc finger CCHC-type containing 11	Zcchc11	-0.583083	5.3161	0.00326505	0.0284799	False
282840	activating transcription factor 5	Atf5	0.493887	5.2153	0.00327334	0.0285308	False
24780	solute carrier family 4 member 2	Slc4a2	0.527256	4.74854	0.00327799	0.0285499	False
361025	thioredoxin domain containing 16	Txndc16	-0.725728	3.60834	0.00328255	0.0285554	False
312705	complement C1r	C1r	0.735222	8.0094	0.00328353	0.0285554	False
316164	SATB homeobox 1	Satb1	-0.596858	5.39537	0.00328662	0.0285569	False
361601	abhydrolase domain containing 17C	Abhd17c	0.687381	3.96792	0.00328861	0.0285569	False
305139	guanylate binding protein family member 6	Gbp6	1.5384	0.758347	0.00331121	0.0287317	False
360850	NIMA-related kinase 7	Nek7	-0.59898	5.85941	0.00331493	0.0287426	False
291848	matrix metallopeptidase 15	Mmp15	-0.660547	4.98287	0.00333149	0.0288647	False
305897	nuclear factor of activated T-cells 4	Nfatc4	0.77961	3.19926	0.0033478	0.0289844	False
64456	spondin 1	Spon1	1.35897	5.15259	0.00336695	0.0291285	False
606294	KIF1 binding protein	Kif1bp	-0.522099	5.7323	0.00338039	0.0292231	False
59086	transforming growth factor, beta 1	Tgfb1	0.859797	4.24659	0.00338932	0.0292462	False
29372	RAS p21 protein activator 3	Rasa3	0.672412	5.98149	0.00338954	0.0292462	False
81687	matrix metallopeptidase 9	Mmp9	2.32074	1.34899	0.00339061	0.0292462	False
56820	receptor activity modifying protein 3	Ramp3	0.990732	1.90139	0.00339761	0.0292849	False
679357	interferon regulatory factor 2 binding protein 2	Irf2bp2	0.751212	4.39017	0.003406	0.0293213	False
25589	kinase insert domain receptor	Kdr	0.542979	4.65052	0.00340687	0.0293213	False
286918	MX dynamin like GTPase 2	Mx2	0.687047	4.13538	0.00343119	0.0295088	False
311676	prostate transmembrane protein, androgen induced 1	Pmepa1	0.9068	3.98108	0.00343775	0.0295433	False
114636	zyxin	Zyx	0.757541	6.36431	0.00344241	0.0295615	False
304061	bromodomain and WD repeat domain containing 1	Brwd1	-0.492163	5.47264	0.00345039	0.0296082	False
100364568	regulation of nuclear pre-mRNA domain containing 2	Rprd2	-0.496798	5.60601	0.00345672	0.0296407	False
57025	ADAM metallopeptidase domain 15	Adam15	0.797196	5.33897	0.00346686	0.0297057	False
308453	coenzyme Q8B	Coq8b	0.633433	4.92684	0.00347176	0.0297259	False
303745	sirtuin 7	Sirt7	0.669183	3.81019	0.00348636	0.0298289	False
501028	similar to mitochondrial ribosomal protein L41	RGD1560917	-1.17447	1.5407	0.00349048	0.0298422	False
691149	capping actin protein of muscle Z-line alpha subunit 1	Capza1	0.557014	6.23712	0.00350366	0.0299195	False
315833	kelch-like family member 31	Klhl31	-0.877128	7.98733	0.00350466	0.0299195	False
308417	nectin cell adhesion molecule 2	Nectin2	0.678293	3.51216	0.00351111	0.0299348	False
299700	similar to DNA segment, Chr 10, Wayne State University 102, expressed	RGD1563365	0.726227	3.42215	0.00351161	0.0299348	False
299131	dehydrogenase/reductase (SDR family) member 7-like 1	Dhrs7l1	1.52854	0.429074	0.00352641	0.030039	False
114638	HPS1, biogenesis of lysosomal organelles complex 3 subunit 1	Hps1	0.762476	3.69756	0.00354701	0.0301767	False
29610	transforming growth factor beta receptor 3	Tgfbr3	0.670659	7.58174	0.00354775	0.0301767	False
501555	retinoic acid induced 2	Rai2	-0.52588	4.9014	0.00355865	0.0302472	False
679975	G protein-coupled receptor 183	Gpr183	1.10439	1.3667	0.00356275	0.03026	False
309760	myopalladin	Mypn	-0.831119	8.70498	0.00356561	0.0302622	False
83727	fibrillin 1	Fbn1	0.951181	7.23328	0.00358852	0.0304344	False
501129	transmembrane protein 182	Tmem182	-0.714184	8.14424	0.00359467	0.0304643	False
291091	serpin family B member 1A	Serpinb1a	0.82367	3.89994	0.00360976	0.03057	False
313511	MOB kinase activator 3C	Mob3c	0.793453	2.67912	0.00362844	0.0307058	False
303468	sarcoglycan, alpha	Sgca	-0.534835	6.70239	0.00363359	0.0307271	False
25139	solute carrier family 2 member 4	Slc2a4	-0.749639	8.35668	0.0036425	0.0307686	False
300177	interleukin-1 receptor-associated kinase 4	Irak4	1.06089	3.10091	0.00364379	0.0307686	False
303903	poly (ADP-ribose) polymerase family, member 14	Parp14	0.754568	3.24976	0.0036548	0.0308171	False
116490	snail family transcriptional repressor 1	Snai1	0.872408	2.82417	0.00365723	0.0308171	False
304954	UDP-N-acteylglucosamine pyrophosphorylase 1-like 2	Uap1l2	0.624197	5.26645	0.0036578	0.0308171	False
29614	proteasome activator subunit 2	Psme2	0.771439	5.24621	0.00366012	0.0308171	False
293702	FK506 binding protein 2	Fkbp2	0.650614	3.85411	0.00366284	0.0308177	False
315648	protein phosphatase 2 scaffold subunit A beta	Ppp2r1b	1.26531	5.03245	0.00367485	0.0308964	False
306306	coiled-coil serine-rich protein 2	Ccser2	-0.601439	4.42715	0.00368442	0.0309544	False
361598	IQ motif containing GTPase activating protein 1	Iqgap1	0.632063	5.7842	0.00369573	0.0310271	False
338477	src-like adaptor	Sla	1.97137	1.8357	0.00370631	0.0310935	False
100359731	TIMELESS interacting protein like 1	Tipinl1	-0.859888	1.61549	0.00371632	0.031155	False
57341	parvin, alpha	Parva	0.532455	5.85868	0.00372178	0.0311783	False
116631	N-acetyltransferase 1	Nat1	0.861606	2.71962	0.00372868	0.0312136	False
114121	cyclin L1	Ccnl1	0.662423	6.26457	0.00373993	0.0312713	False
316624	kelch-like family member 30	Klhl30	-0.571302	6.058	0.00374314	0.0312713	False
64033	cyclin D2	Ccnd2	1.9204	2.58888	0.00374363	0.0312713	False
291100	interferon regulatory factor 4	Irf4	1.71664	4.3909	0.00375279	0.0313253	False
298878	odd-skipped related transciption factor 1	Osr1	1.33592	4.49763	0.00376956	0.031415	False
297520	interleukin 17 receptor C	Il17rc	0.648708	3.95493	0.00377109	0.031415	False
309525	solute carrier family 16, member 12	Slc16a12	2.05897	1.93564	0.00377163	0.031415	False
304109	T-cell lymphoma invasion and metastasis 1	Tiam1	1.24282	0.680583	0.00380634	0.0316813	False
313790	laccase domain containing 1	Lacc1	1.00361	1.34322	0.00381124	0.0316995	False
25282	cytochrome c oxidase subunit 6A1	Cox6a1	0.81346	6.07303	0.00384013	0.031917	False
192272	acyl-CoA thioesterase 2	Acot2	-0.604968	4.88711	0.00384568	0.0319403	False
302363	SH3 domain binding glutamate-rich protein like	Sh3bgrl	0.739343	3.67607	0.0038545	0.0319907	False
25443	fibroblast growth factor 10	Fgf10	1.28397	1.89766	0.00386049	0.0320151	False
117257	G protein-coupled receptor 176	Gpr176	0.916481	2.2058	0.00386294	0.0320151	False
307649	cytokine induced apoptosis inhibitor 1	Ciapin1	-0.554381	5.84922	0.00386953	0.0320469	False
498005	ankyrin repeat and SOCS box-containing 16	Asb16	-0.505194	6.00138	0.00388176	0.0321085	False
306860	glucosaminyl (N-acetyl) transferase 2, I-branching enzyme	Gcnt2	0.95506	3.56204	0.00388249	0.0321085	False
641520	popeye domain containing 3	Popdc3	-0.596174	5.07423	0.0038893	0.032142	False
315084	gasdermin D	Gsdmd	0.663074	3.59472	0.00389681	0.0321812	False
363229	solute carrier family 39 member 10	Slc39a10	0.835222	4.34575	0.00390526	0.0322151	False
305501	IKAROS family zinc finger 1	Ikzf1	1.31506	0.942597	0.00390721	0.0322151	False
50646	protein tyrosine kinase 2 beta	Ptk2b	1.19619	3.15863	0.00390922	0.0322151	False
360646	LIM domain containing 2	Limd2	1.11021	2.41938	0.0039167	0.0322371	False
316916	CLPTM1-like	Clptm1l	0.567196	6.21184	0.00391744	0.0322371	False
94339	matrix metallopeptidase 23	Mmp23	0.767865	2.99578	0.00392116	0.0322449	False
79237	hematopoietically expressed homeobox	Hhex	1.29538	2.76973	0.00393307	0.0323055	False
362391	max dimerization protein 1	Mxd1	0.554282	4.48022	0.00393582	0.0323055	False
310664	prune exopolyphosphatase 1	Prune1	-0.518606	5.71876	0.00393685	0.0323055	False
306204	filamin B	Flnb	0.631277	3.98084	0.00394278	0.0323313	False
294027	collagen type XVII alpha 1 chain	Col17a1	1.19175	0.748904	0.00396551	0.0324835	False
316273	minichromosome maintenance complex component 3	Mcm3	1.48338	2.29455	0.00396692	0.0324835	False
59108	myoglobin	Mb	-0.798629	10.37	0.00397251	0.0325064	False
246331	neuropilin 1	Nrp1	0.621708	5.63672	0.00398038	0.032548	False
192178	trinucleotide repeat containing 6B	Tnrc6b	-0.524118	6.35257	0.0039913	0.032597	False
310288	HPS3, biogenesis of lysosomal organelles complex 2 subunit 1	Hps3	0.706272	3.19532	0.00399198	0.032597	False
83526	attractin	Atrn	-0.570637	6.86316	0.00405245	0.0330612	False
83585	guanine deaminase	Gda	1.2737	5.28626	0.00405451	0.0330612	False
361414	vesicle amine transport 1-like	Vat1l	-1.56436	1.01573	0.00405932	0.0330772	False
315911	ring finger protein 128, E3 ubiquitin protein ligase	Rnf128	1.92457	1.78111	0.00409469	0.0333252	False
24959	phosphoglycerate mutase 2	Pgam2	-0.686931	7.39542	0.00409548	0.0333252	False
85424	E74 like ETS transcription factor 1	Elf1	0.690057	4.17492	0.00409991	0.0333379	False
29630	proteasome activator subunit 1	Psme1	0.787666	6.22284	0.00414228	0.0336528	False
25623	glycogen synthase 2	Gys2	3.38044	4.68382	0.00414441	0.0336528	False
309368	laminin subunit alpha 2	Lama2	-0.646531	6.7138	0.00416743	0.033816	False
296603	vav guanine nucleotide exchange factor 2	Vav2	0.799742	2.61703	0.00418226	0.0339127	False
362792	phospholipase D family, member 4	Pld4	0.901924	3.7971	0.00418591	0.0339187	False
404280	MID1 interacting protein 1	Mid1ip1	0.578302	5.19644	0.00421967	0.0341685	False
24906	RoBo-1	LOC24906	2.27272	2.57466	0.00423415	0.0342619	False
114120	G protein subunit gamma 12	Gng12	0.702834	4.07726	0.00424039	0.0342885	False
305367	ArfGAP with RhoGAP domain, ankyrin repeat and PH domain 2	Arap2	1.02361	0.748826	0.00424748	0.034322	False
296635	phospholipid phosphatase 7	Plpp7	-0.533171	6.56262	0.00426733	0.0344585	False
83535	potassium voltage-gated channel subfamily J member 11	Kcnj11	-0.544388	5.46777	0.00427536	0.0344994	False
307645	adhesion G protein-coupled receptor G5	Adgrg5	1.53986	1.45765	0.00430999	0.0347547	False
295323	tripartite motif-containing 45	Trim45	-0.812143	2.60335	0.00431941	0.0348066	False
310190	family with sequence similarity 105, member A	Fam105a	1.52139	3.37259	0.00435271	0.0350506	False
84006	protein kinase C, iota	Prkci	0.816371	4.29229	0.00437114	0.0351746	False
308431	pleckstrin homology-like domain, family B, member 3	Phldb3	0.849961	2.30003	0.00438865	0.0352882	False
286896	sphingosine-1-phosphate lyase 1	Sgpl1	1.51502	6.37154	0.00439168	0.0352882	False
192245	heat shock protein family B (small) member 6	Hspb6	-0.801461	8.63221	0.00439434	0.0352882	False
252892	leucine-rich, glioma inactivated 1	Lgi1	-0.86979	2.42343	0.00439994	0.0353088	False
293129	ALG8, alpha-1,3-glucosyltransferase	Alg8	1.01798	2.99237	0.00443175	0.0355395	False
81663	G protein subunit alpha 12	Gna12	0.499083	5.81469	0.0044364	0.0355523	False
311726	protein-L-isoaspartate (D-aspartate) O-methyltransferase domain containing 2	Pcmtd2	-0.527282	6.34528	0.00444401	0.0355888	False
363227	nucleic acid binding protein 1	Nabp1	1.601	5.13473	0.00445314	0.0356374	False
313574	5'-nucleotidase, cytosolic IA	Nt5c1a	-0.958956	0.682871	0.00446704	0.0357204	False
64513	pro-apoptotic WT1 regulator	Pawr	0.914956	1.89957	0.00446965	0.0357204	False
297930	WW domain containing E3 ubiquitin protein ligase 1	Wwp1	-0.673201	7.24153	0.00447439	0.0357337	False
64044	caspase 8	Casp8	0.973758	1.94492	0.00450998	0.0359932	False
84386	secretory leukocyte peptidase inhibitor	Slpi	2.7672	6.93577	0.00451675	0.0360226	False
308843	tsukushi, small leucine rich proteoglycan	Tsku	1.58434	3.94576	0.00454644	0.0362345	False
303342	slingshot protein phosphatase 2	Ssh2	-0.544846	5.89762	0.00455377	0.0362681	False
116465	interferon gamma receptor 1	Ifngr1	0.6609	6.9152	0.00458544	0.0364953	False
364634	CUB and Sushi multiple domains 1	Csmd1	-0.952149	1.42145	0.00459502	0.0365466	False
29290	adenosine A1 receptor	Adora1	1.68421	1.6889	0.00460135	0.0365719	False
24233	complement component 4A (Rodgers blood group)	C4a	1.16429	0.536083	0.00461669	0.0366688	False
292770	serine peptidase inhibitor, Kunitz type, 2	Spint2	0.934243	3.64439	0.00463192	0.0367646	False
360980	tensin 3	Tns3	0.535641	4.56703	0.0046744	0.0370765	False
25427	cytochrome P450, family 51	Cyp51	0.62073	4.89308	0.00472647	0.0374641	False
360504	hemoglobin, alpha 2	Hba2	1.12906	6.74987	0.00476407	0.037733	False
282635	muscleblind-like splicing regulator 1	Mbnl1	-0.652505	7.04439	0.00476688	0.037733	False
364154	small integral membrane protein 14	Smim14	0.56495	5.16708	0.00477817	0.0377966	False
501872	CD84 molecule	Cd84	1.89052	0.719488	0.00478667	0.0378381	False
298757	atlastin GTPase 2	Atl2	-0.609444	6.46788	0.00479018	0.0378401	False
60577	solute carrier family 15 member 2	Slc15a2	-0.934612	1.8808	0.0047998	0.0378904	False
498153	G protein-coupled receptor 146	Gpr146	0.731051	4.02089	0.00482578	0.0380464	False
499885	ITPRIP like 1	Itpripl1	0.941767	1.12375	0.0048276	0.0380464	False
311743	mitogen-activated protein kinase kinase kinase 20	Map3k20	-0.756344	6.17381	0.00482937	0.0380464	False
64171	caspase recruitment domain family, member 9	Card9	1.37887	1.20014	0.00483722	0.0380825	False
297518	actin related protein 2/3 complex, subunit 4	Arpc4	0.550311	6.28535	0.00484747	0.0381374	False
313231	ALG2, alpha-1,3/1,6-mannosyltransferase	Alg2	0.549994	4.69835	0.00486556	0.0382538	False
29557	myosin heavy chain 7	Myh7	-0.977643	12.0193	0.00488849	0.0384081	False
309621	RT1 class II, locus Ba	RT1-Ba	1.00093	5.57478	0.00489567	0.0384263	False
690976	calponin 2	Cnn2	0.686497	3.48393	0.00489741	0.0384263	False
85243	phosphatidylinositol-4,5-bisphosphate 3-kinase, catalytic subunit beta	Pik3cb	0.975921	1.77769	0.00492233	0.0385959	False
289051	DENN domain containing 1B	Dennd1b	-0.790737	2.3869	0.00492588	0.0385977	False
680338	C-type lectin domain family 12, member A	Clec12a	1.60461	1.20518	0.00495522	0.0388014	False
24400	G protein subunit beta 1	Gnb1	0.537288	5.84554	0.00496029	0.038815	False
313022	mitogen-activated protein kinase kinase kinase 6	Map3k6	0.941717	3.3398	0.0049705	0.0388688	False
691246	ring finger protein 207	Rnf207	-0.775059	5.19384	0.00498371	0.0389459	False
311731	secernin 3	Scrn3	-0.483229	5.57033	0.0049921	0.0389853	False
304663	LYL1, basic helix-loop-helix family member	Lyl1	0.968511	2.86691	0.00500312	0.0390334	False
286898	NPC intracellular cholesterol transporter 2	Npc2	0.554623	6.05578	0.00500497	0.0390334	False
680609	Epstein-Barr virus induced 3	Ebi3	1.2195	0.881608	0.00501267	0.0390673	False
81823	calcium and integrin binding 1	Cib1	0.64773	4.60572	0.00506203	0.0394014	False
116546	RAS like proto-oncogene B	Ralb	0.633111	4.00496	0.00506312	0.0394014	False
290381	von Willebrand factor A domain containing 8	Vwa8	-0.638291	3.72101	0.00506619	0.0394014	False
313668	DNA damage inducible 1 homolog 2	Ddi2	-1.04472	8.41648	0.00506908	0.0394014	False
287721	vesicle amine transport 1	Vat1	0.495729	6.40638	0.00509469	0.039574	False
313200	hydroxysteroid dehydrogenase like 2	Hsdl2	-0.616089	7.24312	0.00510554	0.0396258	False
304021	collagen type VIII alpha 1 chain	Col8a1	1.20195	4.19327	0.00510817	0.0396258	False
315217	plexin B2	Plxnb2	0.53645	6.91598	0.0051182	0.0396771	False
685433	ecotropic viral integration site 2A	Evi2a	0.960357	2.28354	0.00512374	0.0396937	False
102546683	uncharacterized LOC102546683	LOC102546683	-1.06638	0.894656	0.00513034	0.0397082	False
287231	similar to novel protein	RGD1559575	0.977056	2.46526	0.00513245	0.0397082	False
361972	transmembrane protein 154	Tmem154	1.15373	-0.164587	0.00515518	0.0398576	False
304813	protein phosphatase 1, regulatory subunit 12B	Ppp1r12b	-0.562258	6.57563	0.00516195	0.0398835	False
501047	collagen type VI alpha 5 chain	Col6a5	2.20395	1.29941	0.00516831	0.0398835	False
310194	lysine acetyltransferase 8	Kat8	-0.535465	6.14544	0.00516881	0.0398835	False
362343	poly (ADP-ribose) polymerase family, member 12	Parp12	0.722258	2.67387	0.0051741	0.0398978	False
306081	protocadherin 20	Pcdh20	-1.28585	0.720221	0.00518976	0.0399921	False
304469	Rab interacting lysosomal protein-like 1	Rilpl1	-0.704457	7.91736	0.00521433	0.0401548	False
252900	diacylglycerol O-acyltransferase 2	Dgat2	0.606219	6.76692	0.00523569	0.0402926	False
116632	N-acetyltransferase 2	Nat2	0.972175	0.786019	0.00525776	0.0404357	False
353218	TNF superfamily member 9	Tnfsf9	1.07026	0.44726	0.00527755	0.0405461	False
312634	myotubularin related protein 14	Mtmr14	-0.622201	6.06868	0.00527908	0.0405461	False
295219	solute carrier family 27 member 3	Slc27a3	0.897096	1.615	0.00529046	0.0406067	False
308875	ras homolog family member G	Rhog	0.506674	5.46978	0.00530798	0.0407144	False
289615	ATPase phospholipid transporting 8A1	Atp8a1	-0.595348	3.97482	0.00536768	0.0411451	False
310158	similar to hypothetical protein FLJ11193	RGD1306502	-0.52635	6.17887	0.00538111	0.0412209	False
117186	SH3-domain binding protein 5	Sh3bp5	-0.484191	6.4346	0.00539848	0.0413268	False
689997	family with sequence similarity 91, member A1	Fam91a1	0.495915	5.49422	0.00540274	0.0413322	False
58834	DLC1 Rho GTPase activating protein	Dlc1	0.804932	3.70506	0.00543384	0.0415428	False
114488	RNA binding motif protein 3	Rbm3	0.709593	7.00166	0.005443	0.0415833	False
65037	MER proto-oncogene, tyrosine kinase	Mertk	0.872044	3.43938	0.00544629	0.0415833	False
361274	nudix hydrolase 5	Nudt5	0.818622	3.0402	0.00548203	0.0418288	False
305451	TNFAIP3 interacting protein 2	Tnip2	0.79923	3.51113	0.00548904	0.0418548	False
296969	solute carrier family 35 member B4	Slc35b4	0.637262	4.85895	0.0055219	0.0420778	False
287974	kelch-like family member 6	Klhl6	1.13952	1.33509	0.00552971	0.0421097	False
192281	2'-5' oligoadenylate synthetase 1A	Oas1a	0.890443	1.46931	0.0055556	0.0422556	False
690422	tubulin epsilon and delta complex 1	Tedc1	1.05001	1.35386	0.00555612	0.0422556	False
361773	coiled-coil domain containing 186	Ccdc186	-0.583663	5.2823	0.00558384	0.0424241	False
498425	zinc finger (CCCH type), RNA binding motif and serine/arginine rich 1	Zrsr1	-0.530783	4.21072	0.00558557	0.0424241	False
103689961	selenoprotein W-like	LOC103689961	-0.46256	5.28398	0.00559883	0.0424971	False
307210	translocase of inner mitochondrial membrane 21	Timm21	-0.513416	4.93189	0.00560871	0.0425435	False
364902	ectopic P-granules autophagy protein 5 homolog	Epg5	-0.53197	4.47759	0.00561226	0.0425435	False
245962	Cd48 molecule	Cd48	0.639323	5.78606	0.00561716	0.0425529	False
302703	kelch-like family member 34	Klhl34	-0.656895	3.19354	0.00563359	0.0426496	False
406163	G-protein signaling modulator 3	Gpsm3	1.15089	2.28305	0.00564201	0.0426856	False
298410	cytidine/uridine monophosphate kinase 1	Cmpk1	0.5097	5.98378	0.00570412	0.0431186	False
24176	adrenoceptor beta 2	Adrb2	-1.06407	5.18959	0.00570666	0.0431186	False
287167	hemoglobin alpha, adult chain 1	Hba-a1	1.19835	3.00023	0.00571563	0.0431394	False
317237	uracil phosphoribosyltransferase homolog	Uprt	-0.809985	1.82895	0.00571682	0.0431394	False
54287	eukaryotic translation initiation factor 2-alpha kinase 2	Eif2ak2	0.558754	4.82347	0.00572562	0.0431678	False
117253	dynein, axonemal, heavy chain 11	Dnah11	-0.818057	1.73123	0.00572947	0.0431678	False
310306	ubiquitin specific peptidase 13	Usp13	-0.79776	9.41012	0.00573172	0.0431678	False
54190	rabaptin, RAB GTPase binding effector protein 1	Rabep1	-0.540669	6.3635	0.00574462	0.043237	False
791259	carbonic anhydrase 14	Car14	-0.551022	4.35259	0.00577225	0.0434168	False
501282	myeloid-derived growth factor	Mydgf	0.535639	4.22584	0.0057798	0.0434455	False
29365	multiple PDZ domain crumbs cell polarity complex component	Mpdz	-0.528234	5.35823	0.00582946	0.0437906	False
84360	chloride voltage-gated channel 3	Clcn3	-0.571279	5.01382	0.00584225	0.0438452	False
295342	ras homolog family member C	Rhoc	0.639451	4.87935	0.00584426	0.0438452	False
24603	natriuretic peptide receptor 1	Npr1	0.586831	4.87445	0.00585445	0.0438933	False
292747	fibrillarin	Fbl	0.599636	4.37213	0.00586381	0.0439352	False
366602	tetraspanin 13	Tspan13	-0.579728	6.95919	0.00587854	0.0440172	False
300447	ECSIT signalling integrator	Ecsit	-0.48151	6.50537	0.00588621	0.0440463	False
298598	NECAP endocytosis associated 2	Necap2	0.604323	4.67912	0.00589539	0.0440721	False
140583	checkpoint kinase 1	Chek1	0.486949	6.54779	0.00589724	0.0440721	False
309410	MAM domain containing 2	Mamdc2	-1.02744	1.25588	0.00592383	0.0442424	False
307016	Rho GTPase activating protein 12	Arhgap12	-0.494035	6.0104	0.00594409	0.0443653	False
25193	cyclin D3	Ccnd3	0.648515	4.23549	0.0059559	0.0444249	False
307310	zinc finger protein 474	Zfp474	-1.13834	0.811278	0.00596866	0.0444915	False
689248	endothelial cell surface expressed chemotaxis and apoptosis regulator	Ecscr	0.859429	2.72361	0.00597717	0.0445083	False
25230	adducin 3	Add3	0.471304	5.98159	0.00597856	0.0445083	False
83522	acyl-CoA oxidase 3, pristanoyl	Acox3	0.519548	4.90805	0.00599754	0.0446211	False
297814	carbonic anhydrase 8	Car8	1.44838	1.44555	0.0060287	0.0448243	False
501665	solute carrier family 10, member 3	Slc10a3	0.569253	4.13099	0.00605888	0.0450199	False
298606	solute carrier family 25, member 34	Slc25a34	-0.795586	3.73482	0.00606698	0.0450446	False
83517	ficolin A	Fcna	0.6318	3.8131	0.00606995	0.0450446	False
362282	phosphoenolpyruvate carboxykinase 1	Pck1	4.08476	7.7177	0.00608414	0.0451211	False
307801	glucose-fructose oxidoreductase domain containing 2	Gfod2	0.881021	1.00625	0.00610488	0.0452209	False
498909	coenzyme Q9	Coq9	-0.594272	7.28208	0.00610638	0.0452209	False
684024	dual specificity phosphatase 28	Dusp28	-0.525621	4.44886	0.00611184	0.0452209	False
689274	myozenin 3	Myoz3	-0.722511	2.66828	0.00611313	0.0452209	False
290223	fat storage-inducing transmembrane protein 1	Fitm1	-0.511666	5.83557	0.00614793	0.0454494	False
294270	RT1 class II, locus Db1	RT1-Db1	0.835544	5.72948	0.00615377	0.0454636	False
25486	myosin IXb	Myo9b	0.561879	5.39781	0.0061607	0.045486	False
305896	interferon regulatory factor 9	Irf9	0.642022	4.11022	0.00617739	0.0455803	False
294269	RT1 class II, locus Da	RT1-Da	0.951678	6.19478	0.0061886	0.045634	False
361384	DnaJ heat shock protein family (Hsp40) member B1	Dnajb1	0.593775	4.00519	0.0062023	0.0457061	False
300644	GRAM domain containing 1B	Gramd1b	-0.606797	5.17221	0.00621028	0.045736	False
361044	short chain dehydrogenase/reductase family 39U, member 1	Sdr39u1	-0.53046	4.22577	0.00622315	0.0458018	False
298141	FERM domain containing 3	Frmd3	-1.08223	0.874601	0.00624135	0.0459067	False
360537	target of myb1 like 2 membrane trafficking protein	Tom1l2	-0.559271	5.28477	0.0062453	0.0459067	False
25031	phospholipase C, beta 4	Plcb4	-0.487623	5.50524	0.00626845	0.0460478	False
304545	2'-5'-oligoadenylate synthetase-like	Oasl	1.00232	2.10435	0.00632812	0.0464568	False
117022	interleukin 1 receptor type 2	Il1r2	1.61308	3.07875	0.006412	0.0470429	False
100911757	teashirt zinc finger homeobox 2	Tshz2	0.615429	3.57031	0.00642998	0.0471451	False
289801	uridine phosphorylase 1	Upp1	0.821314	4.01328	0.00644435	0.0472207	False
362018	synaptophysin-like 2	Sypl2	-0.797653	6.72491	0.00645575	0.0472745	False
362662	retinol binding protein 7	Rbp7	1.21355	3.5393	0.00646376	0.0473033	False
79210	follistatin-like 1	Fstl1	0.597923	5.94949	0.00647187	0.0473174	False
313977	lipin 1	Lpin1	-0.909931	7.29307	0.00647381	0.0473174	False
56764	sterile alpha motif domain containing 13	Samd13	-0.859994	1.10233	0.0064894	0.0474016	False
687797	transmembrane protein 233	Tmem233	-0.893414	1.83944	0.00650562	0.0474902	False
293165	SRY box 6	Sox6	-0.854293	2.74259	0.00651541	0.0475319	False
293960	zinc finger AN1-type containing 5	Zfand5	-0.849919	9.90442	0.00652625	0.0475627	False
310663	TNF alpha induced protein 8 like 2	Tnfaip8l2	1.12181	3.18672	0.00652863	0.0475627	False
307428	TNF alpha induced protein 8	Tnfaip8	0.925669	3.16756	0.00653263	0.0475627	False
316241	NFKB inhibitor epsilon	Nfkbie	0.885515	2.81865	0.00653599	0.0475627	False
498229	transmembrane protein 81	Tmem81	1.07583	0.19436	0.00655304	0.0476402	False
309586	tripartite motif-containing 26	Trim26	0.522818	4.33096	0.00655483	0.0476402	False
361527	phospholipase D family, member 3	Pld3	0.498266	5.55817	0.00657073	0.0477056	False
362399	ZXD family zinc finger C	Zxdc	-0.616339	5.8468	0.00657202	0.0477056	False
79128	DAB2, clathrin adaptor protein	Dab2	0.582444	5.64581	0.0066024	0.0478816	False
691411	SH3 domain binding kinase family, member 2	Sbk2	-0.938063	0.653114	0.0066045	0.0478816	False
294667	POC5 centriolar protein	Poc5	-0.509533	5.18928	0.00661254	0.04791	False
353305	T-box 3	Tbx3	-0.624688	3.89369	0.00664053	0.0480829	False
83626	UDP-glucose ceramide glucosyltransferase	Ugcg	0.729683	5.8371	0.00669283	0.0484099	False
361315	Yip1 domain family, member 5	Yipf5	0.489919	5.09145	0.00669401	0.0484099	False
64047	lecithin retinol acyltransferase	Lrat	1.02602	2.67536	0.00671909	0.0485514	False
364405	scavenger receptor class A, member 3	Scara3	0.947176	4.12242	0.00672192	0.0485514	False
291885	minichromosome maintenance complex component 5	Mcm5	1.9273	1.53662	0.00672783	0.0485639	False
314374	forkhead box N3	Foxn3	-0.590172	3.94669	0.00673459	0.0485825	False
299626	growth arrest and DNA-damage-inducible, beta	Gadd45b	-0.594968	4.94578	0.00675442	0.0486954	False
293154	folate receptor beta	Folr2	0.754219	3.78961	0.00676624	0.0487505	False
304091	interleukin 10 receptor subunit beta	Il10rb	0.62758	4.27381	0.00677837	0.0488077	False
25671	SMAD family member 1	Smad1	0.555966	5.00079	0.00679342	0.0488105	False
362622	centrosomal protein 85	Cep85	-0.490213	6.2296	0.00679347	0.0488105	False
83508	timeless circadian regulator	Timeless	0.871688	1.1511	0.00679529	0.0488105	False
311545	histocompatibility minor 13	Hm13	0.463799	6.31979	0.00679555	0.0488105	False
114004	protein phosphatase 1, regulatory (inhibitor) subunit 14A	Ppp1r14a	0.793495	1.68014	0.00681832	0.048903	False
292687	glutaminyl-peptide cyclotransferase-like	Qpctl	0.803391	2.97372	0.00681871	0.048903	False
361668	early B-cell factor 3	Ebf3	0.630603	4.87788	0.00682279	0.048903	False
315870	T-box18	Tbx18	1.13968	2.05573	0.00682524	0.048903	False
361413	nudix hydrolase 7	Nudt7	-0.598173	4.02376	0.00683514	0.0489438	False
362029	amylo-alpha-1, 6-glucosidase, 4-alpha-glucanotransferase	Agl	-0.829719	9.38246	0.00685277	0.0490346	False
65171	secretory carrier membrane protein 5	Scamp5	0.8865	1.42824	0.00685624	0.0490346	False
29579	extended synaptotagmin 1	Esyt1	0.741648	5.96262	0.00688454	0.0491994	False
84018	synaptojanin 2	Synj2	-0.991422	6.37755	0.00688775	0.0491994	False
259242	WAS/WASL interacting protein family, member 3	Wipf3	-0.553432	5.05446	0.00691964	0.0493969	False
288091	protein O-glucosyltransferase 1	Poglut1	0.525543	4.26918	0.0069349	0.0494754	False
307485	TATA-box binding protein associated factor 7	Taf7	-0.498013	5.36414	0.00696004	0.0496244	False
299739	NADH:ubiquinone oxidoreductase subunit A12	Ndufa12	-0.695954	2.6971	0.00701429	0.0499805	False
