# Supplementary material for: Molecular and Cellular Response to Experimental Anisakis pegreffii (Nematoda, Anisakidae) Third-Stage Larval Infection in Rats
Source: Front Immunol. 2018 Sep 7;9:2055. doi: 10.3389/fimmu.2018.02055 (PMC6137129; doi:10.3389/fimmu.2018.02055)
Supplement: Supplementary file 3 [file Table_3.XLSX]

## Sheet: Stomach
Anisakis-infected stomach tissues of Sprague-Dawley rats
	Gene ontology (GO) term	Sub-ontology	N of genes included in GO term	N of up regulated genes in our dataset	p value	FDR
1	response to stress	BP	2568	33	4.68479e-16	8.8529e-12
2	defense response	BP	826	22	8.49281e-16	8.8529e-12
3	inflammatory response	BP	417	17	5.3038e-15	3.68579e-11
4	response to cytokine	BP	670	19	5.89239e-14	3.07111e-10
5	neutrophil chemotaxis	BP	61	9	3.01505e-13	1.10629e-09
6	hemoglobin complex	CC	5	5	3.18388e-13	1.10629e-09
7	chemokine activity	MF	24	7	8.80088e-13	2.35724e-09
8	cellular response to cytokine stimulus	BP	571	17	9.04543e-13	2.35724e-09
9	neutrophil migration	BP	73	9	1.64093e-12	3.80112e-09
10	cytokine activity	MF	75	9	2.11292e-12	4.40501e-09
11	granulocyte chemotaxis	BP	76	9	2.39111e-12	4.53181e-09
12	chemokine receptor binding	MF	32	7	8.39456e-12	1.43807e-08
13	immune response	BP	772	18	9.53677e-12	1.43807e-08
14	receptor ligand activity	MF	179	11	9.76869e-12	1.43807e-08
15	granulocyte migration	BP	89	9	1.03468e-11	1.43807e-08
16	oxygen carrier activity	MF	8	5	1.76996e-11	2.1706e-08
17	oxygen transport	BP	8	5	1.76996e-11	2.1706e-08
18	response to bacterium	BP	402	14	1.97758e-11	2.2624e-08
19	chemokine-mediated signaling pathway	BP	36	7	2.06186e-11	2.2624e-08
20	response to external stimulus	BP	1537	23	3.01596e-11	3.14384e-08
21	receptor regulator activity	MF	206	11	4.49385e-11	4.46132e-08
22	extracellular region	CC	2769	29	6.21991e-11	5.74005e-08
23	response to oxygen-containing compound	BP	1430	22	6.33256e-11	5.74005e-08
24	immune system process	BP	1462	22	9.80765e-11	8.51958e-08
25	multi-organism process	BP	1352	21	1.89869e-10	1.58336e-07
26	myeloid leukocyte migration	BP	126	9	2.45671e-10	1.91409e-07
27	gas transport	BP	12	5	2.47891e-10	1.91409e-07
28	response to other organism	BP	597	15	3.18374e-10	2.34282e-07
29	response to external biotic stimulus	BP	598	15	3.25891e-10	2.34282e-07
30	regulation of receptor activity	BP	258	11	5.02102e-10	3.48927e-07
31	response to biotic stimulus	BP	621	15	5.50989e-10	3.62104e-07
32	leukocyte chemotaxis	BP	138	9	5.558e-10	3.62104e-07
33	wound healing	BP	338	12	5.83902e-10	3.68885e-07
34	cellular response to interleukin-1	BP	93	8	6.08563e-10	3.71429e-07
35	oxygen binding	MF	14	5	6.23562e-10	3.71429e-07
36	molecular carrier activity	MF	15	5	9.33062e-10	5.40347e-07
37	positive regulation of leukocyte chemotaxis	BP	68	7	2.21574e-09	1.24848e-06
38	innate immune response	BP	382	12	2.35251e-09	1.27612e-06
39	response to lipopolysaccharide	BP	299	11	2.38722e-09	1.27612e-06
40	response to molecule of bacterial origin	BP	314	11	3.98845e-09	2.07878e-06
41	response to interleukin-1	BP	118	8	4.11701e-09	2.09345e-06
42	response to organic substance	BP	2366	25	4.56358e-09	2.26527e-06
43	extracellular region part	CC	2636	26	7.4177e-09	3.59638e-06
44	cell chemotaxis	BP	187	9	8.18674e-09	3.87903e-06
45	regulation of leukocyte chemotaxis	BP	83	7	9.15036e-09	4.23926e-06
46	positive regulation of response to external stimulus	BP	195	9	1.18077e-08	5.35147e-06
47	response to chemical	BP	2945	27	1.43845e-08	6.3806e-06
48	response to wounding	BP	453	12	1.59598e-08	6.93185e-06
49	extracellular space	CC	2514	25	1.67001e-08	7.10538e-06
50	cytokine receptor binding	MF	147	8	2.33873e-08	9.75158e-06
51	regulation of response to stimulus	BP	2558	25	2.41224e-08	9.86085e-06
52	leukocyte migration	BP	217	9	2.99046e-08	1.19895e-05
53	positive regulation of leukocyte migration	BP	100	7	3.38525e-08	1.30247e-05
54	haptoglobin binding	MF	3	3	3.42957e-08	1.30247e-05
55	CXCR chemokine receptor binding	MF	11	4	3.43609e-08	1.30247e-05
56	transition metal ion binding	MF	721	14	3.95767e-08	1.47338e-05
57	positive regulation of chemotaxis	BP	104	7	4.44907e-08	1.62727e-05
58	hydrogen peroxide metabolic process	BP	32	5	6.00262e-08	2.15763e-05
59	response to lipid	BP	882	15	6.48752e-08	2.2924e-05
60	iron ion binding	MF	115	7	8.93415e-08	3.10432e-05
61	haptoglobin-hemoglobin complex	CC	4	3	1.36865e-07	4.49135e-05
62	natural killer cell chemotaxis	BP	4	3	1.36865e-07	4.49135e-05
63	regulation of natural killer cell chemotaxis	BP	4	3	1.36865e-07	4.49135e-05
64	response to inorganic substance	BP	551	12	1.37877e-07	4.49135e-05
65	positive regulation of response to stimulus	BP	1425	18	1.84302e-07	5.91126e-05
66	regulation of granulocyte chemotaxis	BP	40	5	1.92346e-07	6.07581e-05
67	response to stimulus	BP	5342	34	2.22109e-07	6.91123e-05
68	heme binding	MF	80	6	2.33621e-07	7.16254e-05
69	regulation of leukocyte migration	BP	134	7	2.55566e-07	7.72179e-05
70	modification of morphology or physiology of other organism	BP	82	6	2.70902e-07	8.06823e-05
71	regulation of chemotaxis	BP	140	7	3.44622e-07	0.000100173
72	receptor binding	MF	1002	15	3.45953e-07	0.000100173
73	tetrapyrrole binding	MF	86	6	3.60195e-07	0.000102868
74	regulation of response to external stimulus	BP	492	11	3.95519e-07	0.00011143
75	positive regulation of cellular process	BP	3673	28	4.05317e-07	0.000112667
76	metal ion homeostasis	BP	402	10	5.58731e-07	0.000153269
77	regulation of response to stress	BP	910	14	7.02597e-07	0.00019023
78	positive regulation of biological process	BP	4041	29	7.37119e-07	0.000197019
79	response to hydrogen peroxide	BP	160	7	8.52213e-07	0.000224898
80	positive regulation of granulocyte chemotaxis	BP	23	4	8.95765e-07	0.000230555
81	positive regulation of neutrophil chemotaxis	BP	23	4	8.95765e-07	0.000230555
82	carbohydrate binding	MF	165	7	1.04855e-06	0.000266586
83	regulation of immune system process	BP	821	13	1.43834e-06	0.000357665
84	G-protein coupled receptor binding	MF	173	7	1.44109e-06	0.000357665
85	chemotaxis	BP	351	9	1.7588e-06	0.000431381
86	taxis	BP	353	9	1.84336e-06	0.000441939
87	positive regulation of immune system process	BP	575	11	1.84424e-06	0.000441939
88	cation homeostasis	BP	459	10	1.86686e-06	0.000442276
89	antioxidant activity	MF	63	5	1.94248e-06	0.00045502
90	response to tumor necrosis factor	BP	182	7	2.02314e-06	0.000463746
91	positive regulation of neutrophil migration	BP	28	4	2.04646e-06	0.000463746
92	regulation of neutrophil chemotaxis	BP	28	4	2.04646e-06	0.000463746
93	response to gamma radiation	BP	64	5	2.10196e-06	0.0004712
94	cytokine-mediated signaling pathway	BP	265	8	2.14237e-06	0.000475151
95	inorganic ion homeostasis	BP	470	10	2.3107e-06	0.00050709
96	multi-multicellular organism process	BP	192	7	2.8889e-06	0.000627373
97	cellular response to chemical stimulus	BP	2116	20	3.11554e-06	0.000669615
98	regulation of cell proliferation	BP	1197	15	3.33933e-06	0.000710392
99	positive regulation of cell migration	BP	386	9	3.84225e-06	0.000809124
100	regulation of cell migration	BP	626	11	4.20636e-06	0.000876941
101	reactive oxygen species metabolic process	BP	204	7	4.31716e-06	0.000891131
102	localization	BP	4096	28	4.68906e-06	0.000958408
103	positive regulation of cell motility	BP	397	9	4.83223e-06	0.000978081
104	ion homeostasis	BP	512	10	4.96576e-06	0.000995445
105	regulation of defense response	BP	399	9	5.03402e-06	0.000999517
106	regulation of neutrophil migration	BP	35	4	5.14595e-06	0.00100264
107	response to interleukin-6	BP	35	4	5.14595e-06	0.00100264
108	homeostatic process	BP	1250	15	5.72583e-06	0.0011053
109	positive regulation of cellular component movement	BP	408	9	6.03448e-06	0.00115419
110	growth factor activity	MF	80	5	6.37363e-06	0.00120798
111	regulation of cell motility	BP	657	11	6.68912e-06	0.00125635
112	positive regulation of cell proliferation	BP	661	11	7.08845e-06	0.00131946
113	leukocyte migration involved in inflammatory response	BP	12	3	7.38931e-06	0.0013633
114	positive regulation of locomotion	BP	419	9	7.48561e-06	0.00136895
115	acute inflammatory response	BP	83	5	7.64161e-06	0.00138532
116	positive regulation of wound healing	BP	39	4	8.00623e-06	0.00143891
117	protein oligomerization	BP	426	9	8.55736e-06	0.00152482
118	cellular response to lipopolysaccharide	BP	148	6	8.67154e-06	0.00153207
119	cell migration	BP	973	13	9.45e-06	0.00165558
120	response to reactive oxygen species	BP	234	7	1.06266e-05	0.00184619
121	neutrophil aggregation	BP	2	2	1.08234e-05	0.00186484
122	cellular response to molecule of bacterial origin	BP	156	6	1.17242e-05	0.00200349
123	collagen catabolic process	BP	14	3	1.21694e-05	0.00204604
124	regulation of lymphocyte chemotaxis	BP	14	3	1.21694e-05	0.00204604
125	cell death	BP	1513	16	1.26386e-05	0.00210791
126	regulation of locomotion	BP	708	11	1.36025e-05	0.00225067
127	cellular response to tumor necrosis factor	BP	161	6	1.40379e-05	0.00230443
128	regulation of cellular component movement	BP	716	11	1.51209e-05	0.00245273
129	hydrogen peroxide catabolic process	BP	15	3	1.51766e-05	0.00245273
130	positive regulation of response to wounding	BP	46	4	1.56191e-05	0.00250482
131	cellular metal ion homeostasis	BP	348	8	1.59068e-05	0.00253148
132	cellular response to organic substance	BP	1744	17	1.77006e-05	0.00279562
133	multicellular organismal catabolic process	BP	16	3	1.86357e-05	0.0029058
134	cell motility	BP	1037	13	1.88163e-05	0.0029058
135	localization of cell	BP	1037	13	1.88163e-05	0.0029058
136	cellular response to biotic stimulus	BP	173	6	2.11221e-05	0.00323789
137	female pregnancy	BP	175	6	2.25425e-05	0.00341072
138	antimicrobial humoral immune response mediated by antimicrobial peptide	BP	17	3	2.25767e-05	0.00341072
139	modification by host of symbiont morphology or physiology	BP	51	4	2.36331e-05	0.00354462
140	molecular function regulator	MF	1063	13	2.45242e-05	0.00365201
141	CCR chemokine receptor binding	MF	18	3	2.70294e-05	0.00399652
142	erythrocyte homeostasis	BP	108	5	2.76013e-05	0.00405234
143	regulation of molecular function	BP	2217	19	2.7991e-05	0.00408081
144	G-protein coupled receptor signaling pathway	BP	378	8	2.88497e-05	0.0041768
145	regulation of localization	BP	2016	18	2.97616e-05	0.0042791
146	CCR2 chemokine receptor binding	MF	3	2	3.24016e-05	0.00456424
147	positive regulation of natural killer cell chemotaxis	BP	3	2	3.24016e-05	0.00456424
148	Toll-like receptor 4 binding	MF	3	2	3.24016e-05	0.00456424
149	cell proliferation	BP	1445	15	3.33244e-05	0.00466273
150	response to estradiol	BP	188	6	3.37694e-05	0.0046935
151	interaction with symbiont	BP	56	4	3.43196e-05	0.00473838
152	regulation of biological quality	BP	2474	20	3.57892e-05	0.00490877
153	chronic inflammatory response	BP	20	3	3.75872e-05	0.0050556
154	disruption of cells of other organism	BP	20	3	3.75872e-05	0.0050556
155	killing of cells of other organism	BP	20	3	3.75872e-05	0.0050556
156	cellular response to interferon-gamma	BP	59	4	4.22214e-05	0.00564251
157	cellular cation homeostasis	BP	403	8	4.55353e-05	0.00604663
158	response to oxidative stress	BP	406	8	4.79934e-05	0.0063327
159	response to organic cyclic compound	BP	969	12	4.89791e-05	0.00642212
160	system development	BP	3237	23	4.95481e-05	0.00645612
161	positive regulation of cell death	BP	532	9	4.98783e-05	0.00645878
162	erythrocyte development	BP	22	3	5.05412e-05	0.00650422
163	animal organ regeneration	BP	123	5	5.15793e-05	0.00659709
164	cellular ion homeostasis	BP	411	8	5.23371e-05	0.00665319
165	divalent inorganic cation homeostasis	BP	304	7	5.71382e-05	0.0072195
166	glycosaminoglycan binding	MF	127	5	6.00993e-05	0.00754789
167	collagen metabolic process	BP	65	4	6.19089e-05	0.0076826
168	myeloid leukocyte mediated immunity	BP	65	4	6.19089e-05	0.0076826
169	response to abiotic stimulus	BP	995	12	6.34851e-05	0.00783159
170	CCR1 chemokine receptor binding	MF	4	2	6.46662e-05	0.00783353
171	regulation of neutrophil mediated cytotoxicity	BP	4	2	6.46662e-05	0.00783353
172	regulation of neutrophil mediated killing of symbiont cell	BP	4	2	6.46662e-05	0.00783353
173	locomotion	BP	1166	13	6.50038e-05	0.00783353
174	multicellular organismal macromolecule metabolic process	BP	66	4	6.57448e-05	0.00787729
175	positive regulation of intracellular signal transduction	BP	697	10	7.172e-05	0.0085441
176	myeloid cell homeostasis	BP	133	5	7.48739e-05	0.00886915
177	positive regulation of defense response	BP	220	6	8.11346e-05	0.00955647
178	positive regulation of ERK1 and ERK2 cascade	BP	136	5	8.32385e-05	0.0097492
179	antimicrobial humoral response	BP	26	3	8.45431e-05	0.00979197
180	astrocyte development	BP	26	3	8.45431e-05	0.00979197
181	immune effector process	BP	442	8	8.72714e-05	0.0100521
182	modification of morphology or physiology of other organism involved in symbiotic interaction	BP	72	4	9.2504e-05	0.0105384
183	response to interferon-gamma	BP	72	4	9.2504e-05	0.0105384
184	cellular response to stimulus	BP	4447	27	0.000102228	0.0115829
185	response to drug	BP	453	8	0.000103598	0.0116746
186	organic acid binding	MF	143	5	0.000105558	0.0118316
187	homeostasis of number of cells	BP	231	6	0.000106187	0.0118384
188	humoral immune response	BP	75	4	0.000108503	0.011989
189	animal organ development	BP	2437	19	0.000108687	0.011989
190	cell killing	BP	77	4	0.000120227	0.0131921
191	lymphocyte chemotaxis	BP	30	3	0.000130801	0.014202
192	cellular response to oxygen-containing compound	BP	906	11	0.000131102	0.014202
193	regulation of signal transduction	BP	2033	17	0.000131475	0.014202
194	acute-phase response	BP	31	3	0.000144481	0.0154469
195	defense response to Gram-negative bacterium	BP	31	3	0.000144481	0.0154469
196	multicellular organism metabolic process	BP	81	4	0.000146396	0.0155718
197	regulation of cell death	BP	1270	13	0.000156461	0.0165578
198	cellular response to interleukin-6	BP	32	3	0.000159059	0.0166975
199	eosinophil chemotaxis	BP	6	2	0.000160984	0.0166975
200	negative regulation of keratinocyte differentiation	BP	6	2	0.000160984	0.0166975
201	RAGE receptor binding	MF	6	2	0.000160984	0.0166975
202	multicellular organism development	BP	3479	23	0.000166512	0.0171853
203	cellular homeostasis	BP	628	9	0.000178033	0.0182839
204	movement of cell or subcellular component	BP	1287	13	0.000179013	0.0182944
205	multi-organism reproductive process	BP	629	9	0.000180182	0.018324
206	response to extracellular stimulus	BP	492	8	0.000183339	0.0185546
207	chemical homeostasis	BP	781	10	0.000184466	0.0185785
208	response to ionizing radiation	BP	162	5	0.000189622	0.018963
209	monocyte chemotaxis	BP	34	3	0.000191012	0.018963
210	peroxidase activity	MF	34	3	0.000191012	0.018963
211	response to hormone	BP	788	10	0.000198441	0.0196071
212	anatomical structure development	BP	3790	24	0.000210907	0.0207406
213	arachidonic acid binding	MF	7	2	0.000224901	0.0217954
214	neutrophil mediated cytotoxicity	BP	7	2	0.000224901	0.0217954
215	neutrophil mediated killing of symbiont cell	BP	7	2	0.000224901	0.0217954
216	oxidoreductase activity, acting on peroxide as acceptor	MF	36	3	0.000226861	0.0217954
217	regulation of lymphocyte migration	BP	36	3	0.000226861	0.0217954
218	keratinocyte proliferation	BP	37	3	0.000246308	0.0235552
219	regulation of cellular process	BP	6536	33	0.000248326	0.0236397
220	multicellular organismal process	BP	4379	26	0.000256613	0.0242467
221	regulation of biological process	BP	6896	34	0.000257028	0.0242467
222	regulation of myeloid leukocyte mediated immunity	BP	38	3	0.000266803	0.0250554
223	transition metal ion homeostasis	BP	96	4	0.000281967	0.0263608
224	calcium ion homeostasis	BP	278	6	0.000290724	0.0270581
225	icosanoid binding	MF	8	2	0.000299236	0.0274822
226	icosatetraenoic acid binding	MF	8	2	0.000299236	0.0274822
227	regulation of apoptotic cell clearance	BP	8	2	0.000299236	0.0274822
228	erythrocyte differentiation	BP	98	4	0.000305142	0.0279017
229	protein complex assembly	BP	1002	11	0.000318284	0.0289764
230	protein complex biogenesis	BP	1003	11	0.000321052	0.0291013
231	biological regulation	BP	7330	35	0.000331877	0.0299523
232	regulation of wound healing	BP	101	4	0.000342424	0.0306389
233	response to heat	BP	101	4	0.000342424	0.0306389
234	cellular divalent inorganic cation homeostasis	BP	287	6	0.000344878	0.0307265
235	cellular chemical homeostasis	BP	543	8	0.000358377	0.0317934
236	interspecies interaction between organisms	BP	290	6	0.000364591	0.0322076
237	astrocyte cell migration	BP	9	2	0.00038392	0.0330742
238	disruption by host of symbiont cells	BP	9	2	0.00038392	0.0330742
239	eosinophil migration	BP	9	2	0.00038392	0.0330742
240	killing by host of symbiont cells	BP	9	2	0.00038392	0.0330742
241	positive regulation of keratinocyte proliferation	BP	9	2	0.00038392	0.0330742
242	regulation of killing of cells of other organism	BP	9	2	0.00038392	0.0330742
243	regulation of leukocyte mediated cytotoxicity	BP	44	3	0.000413097	0.0354414
244	response to glucocorticoid	BP	196	5	0.000457415	0.0390827
245	response to toxic substance	BP	197	5	0.000468184	0.0397771
246	regulation of cell communication	BP	2252	17	0.000469358	0.0397771
247	defense response to bacterium	BP	110	4	0.000473839	0.0399354
248	negative regulation of epidermal cell differentiation	BP	10	2	0.000478888	0.0399354
249	peptidyl-cysteine S-nitrosylation	BP	10	2	0.000478888	0.0399354
250	protein nitrosylation	BP	10	2	0.000478888	0.0399354
251	positive regulation of signal transduction	BP	1053	11	0.000488232	0.0405524
252	cation binding	MF	2266	17	0.000506022	0.0418633
253	regulation of signaling	BP	2274	17	0.000528082	0.0435156
254	response to zinc ion	BP	48	3	0.000534524	0.0438731
255	cytosolic part	CC	205	5	0.000561378	0.0458965
256	regulation of ERK1 and ERK2 cascade	BP	206	5	0.000573942	0.0467404
257	response to organonitrogen compound	BP	904	10	0.000597816	0.0484597
258	leukocyte mediated immunity	BP	208	5	0.000599703	0.0484597
259	mononuclear cell migration	BP	50	3	0.000602938	0.048533

## Sheet: Muscle
Anisakis-infected muscle tissues of Sprague-Dawley rats
	Gene ontology (GO) term	Sub-ontology	N of genes included in GO term	N of up regulated genes in our dataset	p value	FDR
1	defense response	BP	798	46	4.02406e-25	8.25456e-21
2	inflammatory response	BP	404	34	2.0065e-23	2.05796e-19
3	response to external stimulus	BP	1494	57	8.99152e-23	6.1481e-19
4	neutrophil migration	BP	72	18	2.88613e-21	1.22434e-17
5	granulocyte migration	BP	86	19	2.9843e-21	1.22434e-17
6	granulocyte chemotaxis	BP	75	17	2.53386e-19	8.59426e-16
7	neutrophil chemotaxis	BP	62	16	2.93276e-19	8.59426e-16
8	response to bacterium	BP	402	30	3.90832e-19	1.00214e-15
9	immune system process	BP	1426	51	9.49529e-19	2.16419e-15
10	myeloid leukocyte migration	BP	123	19	3.88043e-18	7.65495e-15
11	response to external biotic stimulus	BP	596	34	4.47811e-18	7.65495e-15
12	response to other organism	BP	596	34	4.47811e-18	7.65495e-15
13	response to biotic stimulus	BP	618	34	1.34777e-17	2.12668e-14
14	immune response	BP	757	36	1.28456e-16	1.88216e-13
15	positive regulation of immune system process	BP	568	31	6.3654e-16	8.33941e-13
16	response to lipopolysaccharide	BP	303	24	6.54395e-16	8.33941e-13
17	leukocyte chemotaxis	BP	138	18	7.29389e-16	8.33941e-13
18	leukocyte migration	BP	213	21	7.31777e-16	8.33941e-13
19	positive regulation of response to external stimulus	BP	191	20	1.15324e-15	1.24508e-12
20	response to molecule of bacterial origin	BP	316	24	1.63654e-15	1.67852e-12
21	response to stress	BP	2460	61	3.91082e-15	3.82013e-12
22	regulation of response to external stimulus	BP	479	27	3.44522e-14	3.21236e-11
23	cell chemotaxis	BP	185	18	1.19989e-13	1.07015e-10
24	response to stimulus	BP	5072	86	2.26367e-13	1.93478e-10
25	regulation of immune system process	BP	813	33	2.99519e-13	2.45762e-10
26	positive regulation of leukocyte migration	BP	97	14	3.65484e-13	2.88353e-10
27	response to lipid	BP	851	33	1.15347e-12	8.7634e-10
28	regulation of leukocyte migration	BP	131	15	1.5708e-12	1.15078e-09
29	cell migration	BP	919	34	1.70649e-12	1.20708e-09
30	cytokine activity	MF	72	12	3.13538e-12	2.14387e-09
31	regulation of neutrophil migration	BP	33	9	3.56636e-12	2.35989e-09
32	positive regulation of cell migration	BP	368	22	3.99577e-12	2.56142e-09
33	positive regulation of response to stimulus	BP	1377	41	4.43001e-12	2.75372e-09
34	chemotaxis	BP	334	21	4.98285e-12	3.00627e-09
35	taxis	BP	336	21	5.54433e-12	3.24945e-09
36	positive regulation of cell motility	BP	376	22	6.07039e-12	3.45894e-09
37	regulation of inflammatory response	BP	204	17	6.75137e-12	3.74299e-09
38	regulation of defense response	BP	385	22	7.92474e-12	4.2779e-09
39	cell motility	BP	974	34	8.6792e-12	4.45091e-09
40	localization of cell	BP	974	34	8.6792e-12	4.45091e-09
41	locomotion	BP	1094	36	9.7897e-12	4.89796e-09
42	positive regulation of cellular component movement	BP	387	22	1.08786e-11	5.31317e-09
43	response to oxygen-containing compound	BP	1363	40	1.57313e-11	7.38721e-09
44	multi-organism process	BP	1298	39	1.58454e-11	7.38721e-09
45	positive regulation of locomotion	BP	397	22	1.76034e-11	8.02441e-09
46	acute inflammatory response	BP	84	12	1.83725e-11	8.19296e-09
47	regulation of secretion	BP	497	24	3.07615e-11	1.34257e-08
48	regulation of granulocyte chemotaxis	BP	37	9	3.72024e-11	1.58986e-08
49	regulation of localization	BP	1889	47	4.10076e-11	1.71671e-08
50	positive regulation of neutrophil migration	BP	27	8	1.02334e-10	4.19836e-08
51	cellular response to interleukin-1	BP	98	12	1.07903e-10	4.34002e-08
52	receptor regulator activity	MF	178	15	1.24949e-10	4.92901e-08
53	movement of cell or subcellular component	BP	1208	36	2.00496e-10	7.75994e-08
54	regulation of leukocyte chemotaxis	BP	79	11	2.14054e-10	8.13129e-08
55	regulation of cell migration	BP	593	25	2.273e-10	8.47747e-08
56	positive regulation of secretion	BP	290	18	2.38619e-10	8.52706e-08
57	response to cytokine	BP	650	26	2.39563e-10	8.52706e-08
58	receptor ligand activity	MF	156	14	2.41101e-10	8.52706e-08
59	cellular response to cytokine stimulus	BP	555	24	2.77506e-10	9.64829e-08
60	positive regulation of peptide secretion	BP	192	15	3.37036e-10	1.15227e-07
61	response to chemical	BP	2796	57	3.6662e-10	1.23286e-07
62	positive regulation of leukocyte chemotaxis	BP	64	10	4.64496e-10	1.53681e-07
63	peptide secretion	BP	385	20	5.26963e-10	1.71581e-07
64	regulation of cell motility	BP	621	25	5.886e-10	1.88656e-07
65	secretion	BP	734	27	7.88491e-10	2.48836e-07
66	cellular response to stimulus	BP	4223	72	8.15998e-10	2.53615e-07
67	regulation of response to stimulus	BP	2442	52	8.39629e-10	2.57064e-07
68	regulation of peptide secretion	BP	316	18	9.9347e-10	2.99692e-07
69	cell surface receptor signaling pathway	BP	1558	40	1.06191e-09	3.15694e-07
70	positive regulation of transport	BP	745	27	1.11979e-09	3.28147e-07
71	chemokine activity	MF	23	7	1.26275e-09	3.64829e-07
72	chemokine-mediated signaling pathway	BP	37	8	1.58441e-09	4.51403e-07
73	regulation of response to stress	BP	876	29	1.6681e-09	4.68737e-07
74	response to interleukin-1	BP	123	12	1.75001e-09	4.85107e-07
75	cytokine-mediated signaling pathway	BP	254	16	1.83735e-09	5.02529e-07
76	regulation of secretion by cell	BP	462	21	2.14111e-09	5.77903e-07
77	positive regulation of inflammatory response	BP	76	10	2.37285e-09	6.32134e-07
78	cellular response to chemical stimulus	BP	2037	46	2.56195e-09	6.7376e-07
79	regulation of locomotion	BP	668	25	2.76741e-09	7.18582e-07
80	positive regulation of chemotaxis	BP	100	11	2.89198e-09	7.4154e-07
81	extracellular space	CC	2365	50	2.98449e-09	7.55812e-07
82	regulation of neutrophil chemotaxis	BP	26	7	3.62135e-09	9.05912e-07
83	cellular response to molecule of bacterial origin	BP	161	13	3.78178e-09	9.34647e-07
84	regulation of cellular component movement	BP	680	25	3.98508e-09	9.73165e-07
85	positive regulation of intracellular signal transduction	BP	683	25	4.26856e-09	1.03013e-06
86	regulation of chemotaxis	BP	135	12	6.38357e-09	1.52263e-06
87	immune effector process	BP	446	20	6.47025e-09	1.52557e-06
88	response to organic substance	BP	2262	48	7.68105e-09	1.79047e-06
89	cellular response to oxygen-containing compound	BP	878	28	8.70557e-09	2.00649e-06
90	integral component of membrane	CC	2680	53	9.01235e-09	2.05412e-06
91	multicellular organismal process	BP	4141	69	9.81508e-09	2.21249e-06
92	external side of plasma membrane	CC	175	13	1.0835e-08	2.39419e-06
93	protein secretion	BP	368	18	1.08546e-08	2.39419e-06
94	receptor binding	MF	951	29	1.21084e-08	2.62851e-06
95	innate immune response	BP	371	18	1.21732e-08	2.62851e-06
96	positive regulation of cellular process	BP	3495	62	1.30014e-08	2.7781e-06
97	cellular response to biotic stimulus	BP	179	13	1.37064e-08	2.89854e-06
98	cytokine secretion	BP	146	12	1.42113e-08	2.95862e-06
99	signal transduction	BP	3152	58	1.42789e-08	2.95862e-06
100	cytokine receptor binding	MF	148	12	1.62307e-08	3.32941e-06
101	chemokine receptor binding	MF	32	7	1.64473e-08	3.33126e-06
102	extracellular region part	CC	2482	50	1.65645e-08	3.33126e-06
103	positive regulation of protein secretion	BP	183	13	1.71682e-08	3.41913e-06
104	intrinsic component of membrane	CC	2739	53	1.98222e-08	3.90974e-06
105	positive regulation of defense response	BP	220	14	2.04004e-08	3.98547e-06
106	cellular response to lipopolysaccharide	BP	154	12	2.33904e-08	4.52649e-06
107	regulation of protein secretion	BP	301	16	2.41008e-08	4.62038e-06
108	secretion by cell	BP	637	23	2.54967e-08	4.82669e-06
109	extracellular region	CC	2596	51	2.56476e-08	4.82669e-06
110	regulation of transport	BP	1307	34	2.7112e-08	5.0559e-06
111	response to glucocorticoid	BP	189	13	2.98177e-08	5.51036e-06
112	plasma membrane part	CC	1318	34	3.10949e-08	5.65515e-06
113	defense response to other organism	BP	266	15	3.11525e-08	5.65515e-06
114	regulation of cytokine secretion	BP	127	11	3.32913e-08	5.99039e-06
115	regulation of receptor activity	BP	232	14	4.17889e-08	7.45405e-06
116	positive regulation of secretion by cell	BP	272	15	4.23209e-08	7.48388e-06
117	positive regulation of granulocyte chemotaxis	BP	22	6	4.71847e-08	8.20255e-06
118	positive regulation of neutrophil chemotaxis	BP	22	6	4.71847e-08	8.20255e-06
119	cell surface	CC	502	20	5.28601e-08	9.11192e-06
120	wound healing	BP	325	16	7.42427e-08	1.26912e-05
121	positive regulation of biological process	BP	3835	64	7.54054e-08	1.27834e-05
122	response to corticosteroid	BP	206	13	8.48059e-08	1.41529e-05
123	response to extracellular stimulus	BP	469	19	8.48636e-08	1.41529e-05
124	response to steroid hormone	BP	371	17	8.57257e-08	1.41814e-05
125	response to organic cyclic compound	BP	921	27	1.03974e-07	1.70625e-05
126	response to wounding	BP	429	18	1.12372e-07	1.82051e-05
127	regulation of intracellular signal transduction	BP	1187	31	1.12711e-07	1.82051e-05
128	positive regulation of protein transport	BP	383	17	1.19391e-07	1.91334e-05
129	response to organonitrogen compound	BP	873	26	1.30104e-07	2.06885e-05
130	regulation of signal transduction	BP	1932	41	1.68431e-07	2.65772e-05
131	positive regulation of establishment of protein localization	BP	394	17	1.79065e-07	2.80393e-05
132	cell communication	BP	3461	59	1.87773e-07	2.91802e-05
133	carbohydrate binding	MF	152	11	2.00033e-07	3.08517e-05
134	cell activation	BP	613	21	2.59634e-07	3.97453e-05
135	signaling	BP	3406	58	2.80479e-07	4.26183e-05
136	positive regulation of cell communication	BP	1104	29	2.96389e-07	4.47047e-05
137	membrane part	CC	3593	60	3.0144e-07	4.51346e-05
138	leukocyte activation	BP	513	19	3.22976e-07	4.80087e-05
139	positive regulation of signaling	BP	1110	29	3.32371e-07	4.90498e-05
140	response to fungus	BP	30	6	3.41844e-07	5.00874e-05
141	glycosaminoglycan binding	MF	127	10	3.49114e-07	5.07899e-05
142	regulation of peptide transport	BP	623	21	3.645e-07	5.24969e-05
143	regulation of programmed cell death	BP	1113	29	3.65966e-07	5.24969e-05
144	regulation of ERK1 and ERK2 cascade	BP	200	12	4.45336e-07	6.34387e-05
145	acute-phase response	BP	32	6	4.87913e-07	6.8552e-05
146	response to heat	BP	100	9	4.87915e-07	6.8552e-05
147	response to progesterone	BP	51	7	5.226e-07	7.29257e-05
148	cytokine production	BP	476	18	5.29939e-07	7.34503e-05
149	regulation of cytokine production	BP	428	17	5.65305e-07	7.78262e-05
150	positive regulation of signal transduction	BP	1009	27	5.84638e-07	7.99512e-05
151	G-protein coupled receptor signaling pathway	BP	334	15	6.03944e-07	8.20444e-05
152	response to hormone	BP	758	23	6.41435e-07	8.65641e-05
153	response to nitrogen compound	BP	950	26	6.82398e-07	9.14444e-05
154	regulation of cell communication	BP	2111	42	6.86513e-07	9.14444e-05
155	positive regulation of acute inflammatory response	BP	19	5	7.50384e-07	9.93072e-05
156	regulation of cell death	BP	1224	30	7.95118e-07	0.000104553
157	ERK1 and ERK2 cascade	BP	213	12	8.52076e-07	0.000111329
158	defense response to bacterium	BP	109	9	8.64048e-07	0.000112179
159	response to nutrient	BP	214	12	8.70139e-07	0.000112259
160	regulation of signaling	BP	2131	42	8.87323e-07	0.00011376
161	regulation of apoptotic process	BP	1099	28	9.63269e-07	0.00012273
162	positive regulation of MAPK cascade	BP	347	15	9.93816e-07	0.00012584
163	response to estradiol	BP	178	11	1.03469e-06	0.000130005
164	response to nutrient levels	BP	446	17	1.03938e-06	0.000130005
165	cell adhesion	BP	791	23	1.20778e-06	0.000150152
166	biological adhesion	BP	795	23	1.31721e-06	0.00016277
167	response to ketone	BP	221	12	1.3363e-06	0.000164141
168	positive regulation of multicellular organismal process	BP	1125	28	1.4387e-06	0.000175667
169	receptor activity	MF	512	18	1.53641e-06	0.000186487
170	neutrophil apoptotic process	BP	10	4	1.58253e-06	0.000190273
171	chronic inflammatory response	BP	22	5	1.58615e-06	0.000190273
172	localization	BP	3851	61	1.63154e-06	0.00019458
173	hyaluronic acid binding	MF	10	4	1.68876e-06	0.00020024
174	positive regulation of cytokine secretion	BP	88	8	1.74487e-06	0.000205704
175	positive regulation of phosphorylation	BP	687	21	1.76303e-06	0.000206657
176	regulation of acute inflammatory response	BP	40	6	1.8622e-06	0.000217042
177	response to gamma radiation	BP	62	7	1.93746e-06	0.000224537
178	positive regulation of cell death	BP	523	18	2.13662e-06	0.000246227
179	side of membrane	CC	323	14	2.25626e-06	0.000258562
180	positive regulation of leukocyte cell-cell adhesion	BP	123	9	2.28815e-06	0.000260761
181	positive regulation of phosphate metabolic process	BP	763	22	2.49321e-06	0.000281006
182	positive regulation of phosphorus metabolic process	BP	763	22	2.49321e-06	0.000281006
183	positive regulation of leukocyte activation	BP	197	11	2.54561e-06	0.000285345
184	positive regulation of apoptotic process	BP	475	17	2.57103e-06	0.000286628
185	positive regulation of programmed cell death	BP	477	17	2.72169e-06	0.000301784
186	positive regulation of protein phosphorylation	BP	653	20	3.10308e-06	0.000342223
187	myeloid cell apoptotic process	BP	25	5	3.18744e-06	0.000348029
188	cell death	BP	1452	32	3.18966e-06	0.000348029
189	molecular transducer activity	MF	542	18	3.43211e-06	0.000372502
190	regulation of protein phosphorylation	BP	975	25	3.78036e-06	0.000408139
191	leukocyte migration involved in inflammatory response	BP	12	4	3.88404e-06	0.000417138
192	regulation of protein transport	BP	606	19	4.08319e-06	0.000436242
193	leukocyte aggregation	BP	12	4	4.16393e-06	0.000442563
194	plasma membrane	CC	2422	44	4.41389e-06	0.000466712
195	phagocytosis	BP	132	9	4.46658e-06	0.000469861
196	positive regulation of cell activation	BP	210	11	4.57131e-06	0.000478425
197	cell periphery	CC	2512	45	4.71724e-06	0.000491191
198	programmed cell death	BP	1334	30	4.85486e-06	0.000502155
199	response to purine-containing compound	BP	169	10	4.87148e-06	0.000502155
200	regulation of MAPK cascade	BP	503	17	5.21903e-06	0.00053529
201	positive regulation of ERK1 and ERK2 cascade	BP	134	9	5.25989e-06	0.000536796
202	myeloid leukocyte mediated immunity	BP	72	7	5.5097e-06	0.000559507
203	response to interferon-gamma	BP	74	7	5.6651e-06	0.000572454
204	leukocyte mediated immunity	BP	213	11	5.83309e-06	0.00058654
205	signaling receptor activity	MF	404	15	6.2069e-06	0.000621083
206	regulation of establishment of protein localization	BP	624	19	6.25191e-06	0.000622551
207	positive regulation of immune effector process	BP	140	9	6.91861e-06	0.000685611
208	regulation of cell activation	BP	358	14	6.95282e-06	0.000685688
209	natural killer cell chemotaxis	BP	5	3	8.02157e-06	0.000783555
210	regulation of natural killer cell chemotaxis	BP	5	3	8.02157e-06	0.000783555
211	leukocyte cell-cell adhesion	BP	224	11	8.63778e-06	0.000839748
212	intracellular signal transduction	BP	1756	35	8.95866e-06	0.000866834
213	apoptotic process	BP	1307	29	9.46982e-06	0.000911993
214	lymphocyte chemotaxis	BP	31	5	9.7054e-06	0.000930313
215	homeostatic process	BP	1170	27	1.02478e-05	0.000977732
216	cellular response to organic substance	BP	1687	34	1.05237e-05	0.000999408
217	positive regulation of T cell activation	BP	115	8	1.22235e-05	0.00115549
218	regulation of leukocyte activation	BP	326	13	1.27188e-05	0.00119679
219	regulation of reactive oxygen species metabolic process	BP	151	9	1.29946e-05	0.00121716
220	positive regulation of cytokine production	BP	280	12	1.36854e-05	0.00126845
221	positive regulation of cell-cell adhesion	BP	152	9	1.37231e-05	0.00126845
222	signal transducer activity	MF	602	18	1.37276e-05	0.00126845
223	cellular homeostasis	BP	599	18	1.38142e-05	0.00127072
224	inflammatory cell apoptotic process	BP	16	4	1.40566e-05	0.00128724
225	chemical homeostasis	BP	726	20	1.47532e-05	0.00134504
226	RAGE receptor binding	MF	6	3	1.54554e-05	0.00140281
227	neutrophil homeostasis	BP	17	4	1.59724e-05	0.00144335
228	interaction with symbiont	BP	56	6	1.66415e-05	0.00149723
229	regulation of immune effector process	BP	239	11	1.679e-05	0.00150399
230	response to endogenous stimulus	BP	1198	27	1.69708e-05	0.00151358
231	MAPK cascade	BP	551	17	1.71426e-05	0.00152228
232	G-protein coupled receptor binding	MF	155	9	1.73434e-05	0.00153347
233	regulation of phosphorylation	BP	1064	25	1.76722e-05	0.00155584
234	cellular response to lipid	BP	494	16	1.7889e-05	0.00156819
235	cellular response to interferon-gamma	BP	59	6	1.84152e-05	0.00160145
236	modification of morphology or physiology of other organism	BP	86	7	1.84245e-05	0.00160145
237	heterotypic cell-cell adhesion	BP	35	5	2.05997e-05	0.00178296
238	response to temperature stimulus	BP	160	9	2.29094e-05	0.00197454
239	regulation of phagocytosis	BP	61	6	2.33609e-05	0.00200503
240	positive regulation of lymphocyte proliferation	BP	92	7	2.51123e-05	0.00214449
241	regulation of lymphocyte migration	BP	37	5	2.51948e-05	0.00214449
242	cellular chemical homeostasis	BP	513	16	2.76495e-05	0.0023437
243	positive regulation of lymphocyte activation	BP	167	9	2.88619e-05	0.00243639
244	positive regulation of mononuclear cell proliferation	BP	94	7	2.92796e-05	0.00246152
245	signal transduction by protein phosphorylation	BP	575	17	2.96759e-05	0.00248466
246	positive regulation of T cell proliferation	BP	65	6	3.02788e-05	0.00252483
247	response to yeast	BP	7	3	3.08349e-05	0.0025608
248	regulation of lipid catabolic process	BP	39	5	3.17695e-05	0.00262777
249	reactive oxygen species metabolic process	BP	211	10	3.24072e-05	0.00266976
250	positive regulation of leukocyte proliferation	BP	96	7	3.35696e-05	0.00275446
251	CCR chemokine receptor binding	MF	21	4	3.82405e-05	0.00312521
252	cell-cell adhesion	BP	471	15	3.86324e-05	0.00314471
253	glycosaminoglycan metabolic process	BP	66	6	4.02814e-05	0.00326598
254	myeloid leukocyte activation	BP	136	8	4.60441e-05	0.00371851
255	aminoglycan metabolic process	BP	68	6	4.75661e-05	0.00382637
256	negative regulation of secretion by cell	BP	135	8	4.83191e-05	0.00387176
257	regulation of phosphate metabolic process	BP	1203	26	4.96618e-05	0.00396386
258	regulation of cell-cell adhesion	BP	270	11	5.07581e-05	0.00403567
259	response to tumor necrosis factor	BP	181	9	5.28803e-05	0.00418816
260	regulation of phosphorus metabolic process	BP	1208	26	5.32761e-05	0.00420328
261	regulation of multicellular organismal process	BP	1906	35	5.35573e-05	0.00420927
262	regulation of myeloid leukocyte mediated immunity	BP	43	5	5.5388e-05	0.00433654
263	transport	BP	2934	47	5.72152e-05	0.00446257
264	response to peptide	BP	429	14	5.82635e-05	0.00452593
265	regulation of immune response	BP	432	14	5.84688e-05	0.00452593
266	regulation of cell proliferation	BP	1141	25	5.94698e-05	0.00458331
267	regulation of myeloid cell apoptotic process	BP	23	4	5.9657e-05	0.00458331
268	response to peptide hormone	BP	375	13	6.03518e-05	0.00461939
269	response to drug	BP	433	14	6.11828e-05	0.00466559
270	positive regulation of cell adhesion	BP	276	11	6.26297e-05	0.00474578
271	eosinophil migration	BP	9	3	6.26972e-05	0.00474578
272	fever generation	BP	9	3	6.6282e-05	0.00499869
273	cytokine metabolic process	BP	74	6	6.72344e-05	0.00505194
274	regulation of neutrophil apoptotic process	BP	9	3	6.82697e-05	0.00511101
275	response to organophosphorus	BP	144	8	7.08948e-05	0.00528823
276	neutrophil extravasation	BP	9	3	7.27951e-05	0.00541031
277	positive regulation of lymphocyte migration	BP	24	4	7.49356e-05	0.00554929
278	cellular response to ketone	BP	107	7	7.69438e-05	0.00567041
279	regulation of T cell activation	BP	190	9	7.73476e-05	0.00567041
280	chemokine metabolic process	BP	9	3	7.74004e-05	0.00567041
281	neutrophil mediated cytotoxicity	BP	9	3	7.88329e-05	0.00572369
282	neutrophil mediated killing of symbiont cell	BP	9	3	7.88329e-05	0.00572369
283	positive regulation of cellular protein metabolic process	BP	1091	24	7.89647e-05	0.00572369
284	cellular divalent inorganic cation homeostasis	BP	284	11	8.26809e-05	0.00596372
285	CXCR chemokine receptor binding	MF	9	3	8.28577e-05	0.00596372
286	modification of morphology or physiology of other organism involved in symbiotic interaction	BP	75	6	8.46986e-05	0.0060749
287	positive regulation of protein modification process	BP	820	20	8.53656e-05	0.00610141
288	transmembrane signaling receptor activity	MF	339	12	8.67235e-05	0.00617694
289	regulation of hormone levels	BP	285	11	8.8027e-05	0.00623593
290	thymocyte migration	BP	2	2	8.81597e-05	0.00623593
291	humoral immune response	BP	77	6	8.94447e-05	0.00629368
292	interspecies interaction between organisms	BP	285	11	8.95898e-05	0.00629368
293	regulation of T cell proliferation	BP	112	7	9.01251e-05	0.00630968
294	mononuclear cell migration	BP	49	5	9.26539e-05	0.00646466
295	regulation of lymphocyte proliferation	BP	151	8	9.34967e-05	0.00650135
296	negative regulation of secretion	BP	149	8	9.65578e-05	0.00669152
297	response to ionizing radiation	BP	151	8	9.78512e-05	0.00675832
298	cellular metal ion homeostasis	BP	343	12	0.000102651	0.00706606
299	regulation of mononuclear cell proliferation	BP	153	8	0.000103364	0.00709131
300	neutrophil aggregation	BP	2	2	0.000106087	0.00723909
301	hyaluronan metabolic process	BP	26	4	0.000106224	0.00723909
302	antimicrobial humoral response	BP	27	4	0.000108098	0.0073424
303	establishment of localization	BP	3013	47	0.000115061	0.00778959
304	regulation of leukocyte cell-cell adhesion	BP	200	9	0.000116098	0.00783392
305	T cell activation	BP	297	11	0.00011829	0.00795566
306	transmembrane receptor activity	MF	351	12	0.000122111	0.00818585
307	divalent inorganic cation homeostasis	BP	297	11	0.000122521	0.00818658
308	regulation of leukocyte proliferation	BP	157	8	0.000123647	0.00823497
309	cellular response to organonitrogen compound	BP	465	14	0.000133105	0.00883617
310	developmental process	BP	3883	56	0.000141063	0.00930589
311	regulation of nitric oxide biosynthetic process	BP	53	5	0.000141088	0.00930589
312	response to vitamin	BP	120	7	0.000143772	0.00945256
313	immune response-regulating signaling pathway	BP	206	9	0.000145324	0.00947735
314	modification by host of symbiont morphology or physiology	BP	52	5	0.000146268	0.00947735
315	negative regulation of multi-organism process	BP	120	7	0.000146886	0.00947735
316	regulation of developmental process	BP	1675	31	0.000147079	0.00947735
317	pattern recognition receptor activity	MF	11	3	0.000147257	0.00947735
318	signaling pattern recognition receptor activity	MF	11	3	0.000147257	0.00947735
319	regulation of cell adhesion	BP	471	14	0.000147741	0.00947735
320	disruption by host of symbiont cells	BP	11	3	0.000148307	0.00947735
321	killing by host of symbiont cells	BP	11	3	0.000148307	0.00947735
322	positive regulation of reactive oxygen species metabolic process	BP	86	6	0.000160002	0.0101929
323	reactive oxygen species biosynthetic process	BP	86	6	0.000164356	0.0104379
324	regulation of chemokine production	BP	55	5	0.000176514	0.0111555
325	endocytosis	BP	419	13	0.000176744	0.0111555
326	Toll-like receptor binding	MF	12	3	0.000178045	0.0112032
327	protein kinase B signaling	BP	125	7	0.000180831	0.0113437
328	lymphocyte migration	BP	56	5	0.000187509	0.0117268
329	positive regulation of interleukin-8 secretion	BP	12	3	0.000189485	0.0118143
330	positive regulation of developmental process	BP	943	21	0.000197618	0.0122841
331	system development	BP	3079	47	0.000198418	0.0122965
332	chemokine production	BP	57	5	0.000209262	0.0129295
333	positive regulation of protein metabolic process	BP	1165	24	0.000216942	0.0133638
334	regeneration	BP	218	9	0.000221554	0.013607
335	regulation of protein localization	BP	811	19	0.000222332	0.013614
336	cellular calcium ion homeostasis	BP	265	10	0.000223274	0.013631
337	response to alcohol	BP	216	9	0.000224689	0.0136767
338	phagocytosis, recognition	BP	13	3	0.000232035	0.0140793
339	positive regulation of lipid localization	BP	59	5	0.000232677	0.0140793
340	regulation of lymphocyte activation	BP	269	10	0.000234222	0.0141132
341	monocyte chemotaxis	BP	33	4	0.000234613	0.0141132
342	regulation of protein modification process	BP	1246	25	0.000238568	0.0143092
343	interleukin-1 production	BP	60	5	0.000252402	0.0150848
344	regulation of leukocyte mediated immunity	BP	131	7	0.00025297	0.0150848
345	regulation of biological quality	BP	2309	38	0.000254222	0.0151155
346	response to abiotic stimulus	BP	958	21	0.000256936	0.015201
347	negative regulation of amine transport	BP	14	3	0.000257141	0.015201
348	positive regulation of natural killer cell chemotaxis	BP	3	2	0.000259424	0.0152918
349	carboxylic acid binding	MF	132	7	0.000265607	0.0156114
350	calcium ion homeostasis	BP	271	10	0.000267191	0.0156597
351	negative regulation of interleukin-1-mediated signaling pathway	BP	3	2	0.00026813	0.0156699
352	regulation of multi-organism process	BP	271	10	0.000269869	0.0157128
353	response to toxic substance	BP	176	8	0.000270395	0.0157128
354	heat generation	BP	14	3	0.000272571	0.0157945
355	leukocyte mediated cytotoxicity	BP	61	5	0.000275903	0.0159078
356	nitric oxide biosynthetic process	BP	61	5	0.000276077	0.0159078
357	regulation of lymphocyte chemotaxis	BP	14	3	0.000277476	0.0159436
358	multicellular organism development	BP	3306	49	0.000279905	0.0160382
359	regulation of peptidyl-tyrosine phosphorylation	BP	177	8	0.000288209	0.0164174
360	Toll-like receptor 4 binding	MF	3	2	0.000288495	0.0164174
361	organic acid binding	MF	134	7	0.000288924	0.0164174
362	symbiosis, encompassing mutualism through parasitism	BP	273	10	0.000292768	0.0165899
363	T cell migration	BP	34	4	0.000295137	0.0166781
364	cell surface pattern recognition receptor signaling pathway	BP	3	2	0.000304806	0.0171772
365	regulation of cytokine biosynthetic process	BP	63	5	0.000306848	0.0172448
366	inflammatory response to antigenic stimulus	BP	35	4	0.000310114	0.0173808
367	anatomical structure development	BP	3603	52	0.000310999	0.0173829
368	positive regulation of nitric-oxide synthase biosynthetic process	BP	15	3	0.000318914	0.0177768
369	positive regulation of cytosolic calcium ion concentration	BP	179	8	0.00032672	0.0181626
370	cellular cation homeostasis	BP	389	12	0.000328373	0.018181
371	metal ion homeostasis	BP	390	12	0.000328824	0.018181
372	protein phosphorylation	BP	1276	25	0.00033271	0.0183465
373	regulation of lipid localization	BP	97	6	0.000338426	0.0186116
374	T cell proliferation	BP	139	7	0.000350309	0.0192136
375	nitric oxide metabolic process	BP	64	5	0.000352951	0.0193047
376	defense response to fungus	BP	15	3	0.00035427	0.0193047
377	response to reactive oxygen species	BP	233	9	0.000354793	0.0193047
378	positive regulation of interleukin-8 production	BP	36	4	0.000360696	0.019574
379	regulation of heterotypic cell-cell adhesion	BP	15	3	0.000362327	0.0195934
380	peptide binding	MF	184	8	0.000363759	0.0195934
381	gliogenesis	BP	232	9	0.000363919	0.0195934
382	positive regulation of cellular extravasation	BP	15	3	0.000371133	0.0199295
383	response to insulin	BP	231	9	0.000373668	0.0200132
384	organic substance transport	BP	1760	31	0.000375029	0.0200338
385	disruption of cells of other organism involved in symbiotic interaction	BP	15	3	0.000383495	0.0203799
386	killing of cells in other organism involved in symbiotic interaction	BP	15	3	0.000383495	0.0203799
387	cellular ion homeostasis	BP	396	12	0.000385322	0.0204165
388	glial cell migration	BP	37	4	0.000386175	0.0204165
389	import into cell	BP	455	13	0.000391953	0.0206422
390	cellular response to estradiol stimulus	BP	37	4	0.000392455	0.0206422
391	positive regulation of metabolic process	BP	2356	38	0.000396527	0.020803
392	lymphocyte proliferation	BP	187	8	0.000406556	0.0212747
393	G-protein coupled receptor activity	MF	143	7	0.000416494	0.0217393
394	cellular oxidant detoxification	BP	68	5	0.000420424	0.0218887
395	glycosaminoglycan biosynthetic process	BP	37	4	0.000422064	0.0219185
396	negative regulation of response to external stimulus	BP	187	8	0.000423773	0.0219516
397	positive regulation of NF-kappaB import into nucleus	BP	16	3	0.000429387	0.0221864
398	mononuclear cell proliferation	BP	189	8	0.00043928	0.0226406
399	regulation of molecular function	BP	2109	35	0.000445316	0.0228942
400	cell proliferation	BP	1375	26	0.000451226	0.0230922
401	positive regulation of nitric oxide biosynthetic process	BP	38	4	0.000452741	0.0230922
402	positive regulation of nitric oxide metabolic process	BP	38	4	0.000452741	0.0230922
403	negative regulation of glutamate secretion	BP	4	2	0.000453671	0.0230922
404	regulation of cellular process	BP	6229	77	0.000457996	0.0232547
405	reactive nitrogen species metabolic process	BP	68	5	0.000467443	0.0236026
406	carbohydrate homeostasis	BP	191	8	0.000468301	0.0236026
407	glucose homeostasis	BP	191	8	0.000468301	0.0236026
408	aminoglycan biosynthetic process	BP	38	4	0.000470713	0.023666
409	CCR2 chemokine receptor binding	MF	4	2	0.000481998	0.0241742
410	cellular detoxification	BP	70	5	0.000483667	0.0241987
411	chronic inflammatory response to antigenic stimulus	BP	4	2	0.000487064	0.0242666
412	adiponectin secretion	BP	4	2	0.000488573	0.0242666
413	regulation of adiponectin secretion	BP	4	2	0.000488573	0.0242666
414	female gamete generation	BP	69	5	0.000493115	0.024433
415	reproductive process	BP	864	19	0.000498114	0.0246212
416	CCR1 chemokine receptor binding	MF	4	2	0.000501832	0.0247454
417	reproduction	BP	865	19	0.00050459	0.0248217
418	cellular extravasation	BP	39	4	0.000507183	0.0248529
419	positive regulation of chemokine production	BP	39	4	0.000507646	0.0248529
420	regulation of tyrosine phosphorylation of STAT protein	BP	39	4	0.000511462	0.02498
421	cellular response to peptide	BP	295	10	0.000516713	0.0251766
422	cellular response to nitrogen compound	BP	532	14	0.00053598	0.0260535
423	hormone secretion	BP	194	8	0.000543383	0.0263509
424	cytokine biosynthetic process	BP	72	5	0.000567515	0.0274562
425	regulation of reactive oxygen species biosynthetic process	BP	71	5	0.000569118	0.027469
426	leukocyte proliferation	BP	197	8	0.000579199	0.0278899
427	detoxification	BP	73	5	0.000583626	0.0280373
428	positive regulation of phagocytosis	BP	41	4	0.000593994	0.0284687
429	innate immune response activating cell surface receptor signaling pathway	BP	4	2	0.000611161	0.0292232
430	membrane	CC	5304	68	0.00061717	0.0294375
431	regulation of neutrophil mediated cytotoxicity	BP	4	2	0.000621217	0.0294375
432	regulation of neutrophil mediated killing of symbiont cell	BP	4	2	0.000621217	0.0294375
433	hormone transport	BP	198	8	0.000621384	0.0294375
434	biological regulation	BP	6953	83	0.000627736	0.0296699
435	peptidyl-tyrosine phosphorylation	BP	251	9	0.000632704	0.029836
436	regulation of lipid transport	BP	72	5	0.000637732	0.0300041
437	response to dexamethasone	BP	72	5	0.000640636	0.0300718
438	animal organ development	BP	2330	37	0.00066306	0.0310533
439	regulation of cytosolic calcium ion concentration	BP	200	8	0.000667638	0.0311965
440	peptidyl-tyrosine modification	BP	254	9	0.000688558	0.0320993
441	tyrosine phosphorylation of STAT protein	BP	42	4	0.000690089	0.0320993
442	positive regulation of lipid transport	BP	43	4	0.000696953	0.0323452
443	cellular response to peptide hormone stimulus	BP	253	9	0.000705269	0.0326573
444	cellular response to toxic substance	BP	76	5	0.000716393	0.0330977
445	lymphocyte activation	BP	426	12	0.00071999	0.0331891
446	immune response-regulating cell surface receptor signaling pathway	BP	114	6	0.000726359	0.0334076
447	lipopolysaccharide-mediated signaling pathway	BP	43	4	0.000731138	0.0335196
448	regulation of cell shape	BP	114	6	0.000732062	0.0335196
449	negative regulation of cell proliferation	BP	487	13	0.000748479	0.034195
450	positive regulation of JAK-STAT cascade	BP	43	4	0.000758062	0.0344792
451	positive regulation of STAT cascade	BP	43	4	0.000758062	0.0344792
452	negative regulation of transport	BP	366	11	0.000769357	0.0349155
453	animal organ regeneration	BP	115	6	0.000780326	0.0353352
454	cellular response to tumor necrosis factor	BP	160	7	0.000790602	0.0357216
455	cell killing	BP	77	5	0.000799847	0.0360599
456	regulation of hormone secretion	BP	159	7	0.000818461	0.0368182
457	amide binding	MF	208	8	0.000820501	0.0368292
458	nitric-oxide synthase biosynthetic process	BP	20	3	0.000827335	0.0369741
459	regulation of nitric-oxide synthase biosynthetic process	BP	20	3	0.000827335	0.0369741
460	T cell differentiation	BP	160	7	0.000833036	0.037148
461	regulation of symbiosis, encompassing mutualism through parasitism	BP	159	7	0.000853784	0.0379906
462	regulation of JAK-STAT cascade	BP	78	5	0.000873629	0.0387057
463	regulation of STAT cascade	BP	78	5	0.000873629	0.0387057
464	regulation of cellular protein metabolic process	BP	1762	30	0.000884631	0.0391087
465	monocyte aggregation	BP	5	2	0.000890937	0.0393028
466	regulation of interleukin-1-mediated signaling pathway	BP	5	2	0.00089965	0.039602
467	cytokine binding	MF	79	5	0.00093	0.0408503
468	cation homeostasis	BP	439	12	0.00093707	0.0410729
469	positive regulation of intracellular protein transport	BP	211	8	0.000946999	0.0413602
470	positive regulation of intracellular transport	BP	263	9	0.000947658	0.0413602
471	positive regulation of neutrophil apoptotic process	BP	5	2	0.000954653	0.0415771
472	regulation of peptidase activity	BP	266	9	0.000994144	0.0432053
473	molecular function regulator	MF	985	20	0.00099907	0.0433109
474	positive regulation of fat cell differentiation	BP	46	4	0.0010008	0.0433109
475	positive regulation of reactive oxygen species biosynthetic process	BP	47	4	0.00100302	0.0433159
476	regulation of biological process	BP	6575	79	0.00101196	0.04361
477	negative regulation of inflammatory response	BP	81	5	0.00102123	0.043917
478	response to mechanical stimulus	BP	215	8	0.00104901	0.0449606
479	regulation of interleukin-8 secretion	BP	21	3	0.00104988	0.0449606
480	leukocyte homeostasis	BP	81	5	0.00106182	0.0453774
481	positive regulation of cellular metabolic process	BP	2210	35	0.00106478	0.0454093
482	positive regulation of protein import into nucleus	BP	82	5	0.00108176	0.0460375
483	regulation of alpha-beta T cell proliferation	BP	22	3	0.00109083	0.0463061
484	apical part of cell	CC	270	9	0.00109258	0.0463061
485	leukocyte apoptotic process	BP	81	5	0.00109657	0.0463792
486	ovulation	BP	22	3	0.00110406	0.0466001
487	regulation of T cell differentiation	BP	83	5	0.00111948	0.0471538
488	inorganic ion homeostasis	BP	449	12	0.0011384	0.0478523
489	cellular response to organic cyclic compound	BP	508	13	0.00115769	0.0485637
490	positive regulation of peptidyl-tyrosine phosphorylation	BP	123	6	0.00117403	0.0491486
491	eosinophil chemotaxis	BP	6	2	0.00117956	0.0492004
492	vasculature development	BP	511	13	0.0011819	0.0492004
493	regulation of interleukin-1 production	BP	49	4	0.00118246	0.0492004
494	positive regulation of protein import	BP	84	5	0.00120232	0.0499255
